# Supplementary material
Source: MDPI journal article supplement (https://www.mdpi.com/2624-8549/2/2/20)
Supplement: s1 [file s1]

## Towards a real knotaxane

*Torben Duden and Ulrich Lüning\**

### Supporting information

The following compounds have been purchased:

ammonium hexafluorophosphate (97 %, abcr), 4-benzyloxyphenol (97 %, Alfa Aesar), 1,10-diaminodecane (97 %, Sigma Aldrich), 1,8-diaminooctane (98 %, abcr), 2,6-dimethylpyridine (99%, Sigma Aldrich), phosphorus tribromide (98 %, Merck), sodium azide (99 %, Merck), sodium borohydrid (97 %, abcr), DB24C8 (98 %, TCI), tetrakis(acetonitrile)copper(I) hexafluorophosphate (97 %, TCI), methyl iodide (99 %, Sigma Aldrich)

The synthetic procedures for compounds which are not described in the literature are listed below. In the assignments of NMR signals, the following abbreviations have been used: Ar = aryl ring, further identification by prefix or indices, see drawings; Ar<sub>crown</sub> = benzene ring of DB24C8; Tri = triazol/ium ring.

***N,N'*-Bis[4-(prop-2-inyloxy)phenylmethyl]octane-1,8-diylidamine (2a)**

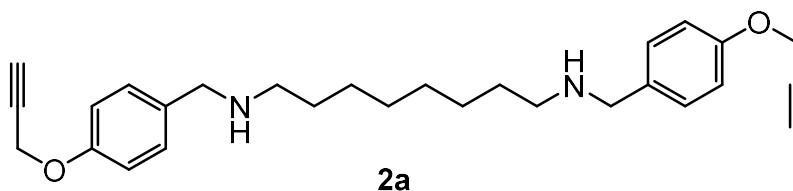

Under nitrogen atmosphere, 1,8-diaminooctane (900 mg, 6.25 mmol) and 4-(prop-2-inyloxy)benzaldehyde [1] **1** (2.00 g, 12.5 mmol) were dissolved in dry methanol (80 mL). The solution was stirred at room temp. for 2 h resulting in a precipitation of a colorless solid. Next, sodium borohydride (3.91 g, 103 mmol) was added in portions at 0 °C. The mixture was stirred for 4 h at 0 °C and then for another 16 h at room temp. The clear solution was carefully mixed with water (30 mL) and the solvent was removed in vacuo. The aqueous layer was extracted with dichloromethane (3 x50 mL). The organic layer was dried with magnesium sulfate and the solvent was removed in vacuo. A pale yellow solid was obtained.

**Yield:** 2.58 g (5.91 mmol, 95 %).

**Meltingpoint:** 63 °C.

**<sup>1</sup>H-NMR** (500 MHz, CDCl<sub>3</sub>):  $\delta$  = 7.27-7.23 (m, 4 H, Ar-*H*-2,6), 6.95-6.91 (m, 4 H, Ar-*H*-3,5), 4.68 (d, <sup>4</sup>*J* = 2.4 Hz, 4 H, Ar-OCH<sub>2</sub>), 3.73 (s, 4 H, Ar-CH<sub>2</sub>), 2.60 (t, <sup>3</sup>*J* = 7.1 Hz, 4 H, Ar-CH<sub>2</sub>NHCH<sub>2</sub>), 2.51 (t, <sup>4</sup>*J* = 2.4 Hz, 2 H, CH), 1.53-1.45 (m, 4 H, NHCH<sub>2</sub>CH<sub>2</sub>), 1.35-1.22 (m, 8 H, NHCH<sub>2</sub>CH<sub>2</sub>CH<sub>2</sub>CH<sub>2</sub>) ppm.

**<sup>13</sup>C-NMR** (125 MHz, CDCl<sub>3</sub>):  $\delta$  = 156.7 (s, Ar-C-4), 133.5 (s, Ar-C-1), 129.5 (d, Ar-C-2,6), 115.0 (d, Ar-C-3,5), 78.8 (s, CCH), 75.6 (d, CH), 56.0 (t, OCH<sub>2</sub>), 53.6 (t, Ar-CH<sub>2</sub>), 49.5 (t, Ar-CH<sub>2</sub>NHCH<sub>2</sub>), 30.1 (t, NHCH<sub>2</sub>CH<sub>2</sub>), 29.6 (t, NHCH<sub>2</sub>CH<sub>2</sub>CH<sub>2</sub>CH<sub>2</sub>), 27.4 (t, NHCH<sub>2</sub>CH<sub>2</sub>CH<sub>2</sub>) ppm.

**IR** (ATR):  $\tilde{\nu}$  = 3288 (w, C≡CH), 3260 (m, NH), 2921 (m, aliph. CH), 2162 (w, C≡C), 1507, 1451 (s, arom.), 1232, 1022 (s, CO), 809 (s, 1,4-disubst.) cm<sup>-1</sup>.

**MS** (HR-ESI): C<sub>28</sub>H<sub>37</sub>N<sub>2</sub>O<sub>2</sub> calcd. *m/z* = 433.2850, found *m/z* = 433.2847 ( $\Delta$  = -0.56 ppm).

**Elemental analysis:** C<sub>28</sub>H<sub>36</sub>N<sub>2</sub>O<sub>2</sub>•0.2 H<sub>2</sub>O: calc.C 76.94, H 8.42, N 6.41, found C 76.66, H 8.42, N 6.43.

20180518-15-L505Duden\_7438  
 Position 15, Mitarbeiter Duden , Sample TD-P-230F2, Menge 5 mg / CDCl<sub>3</sub>, Re kein

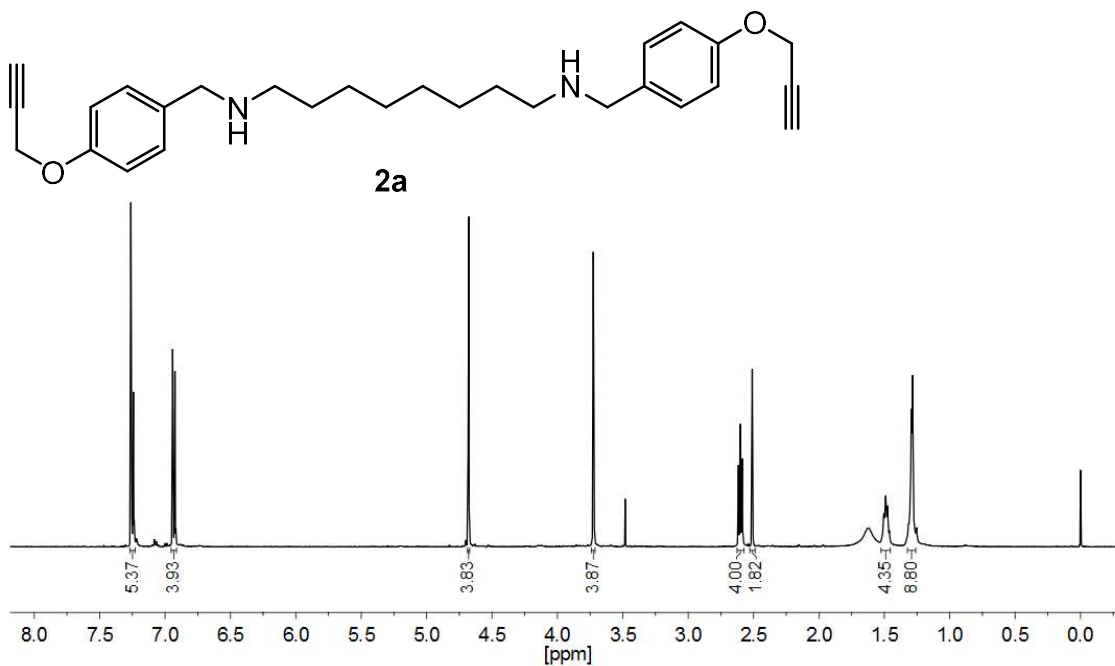

20180518-15-L505Duden\_7438  
 Position 15, Mitarbeiter Duden , Sample TD-P-230F2, Menge 5 mg / CDCl<sub>3</sub>, Re kein

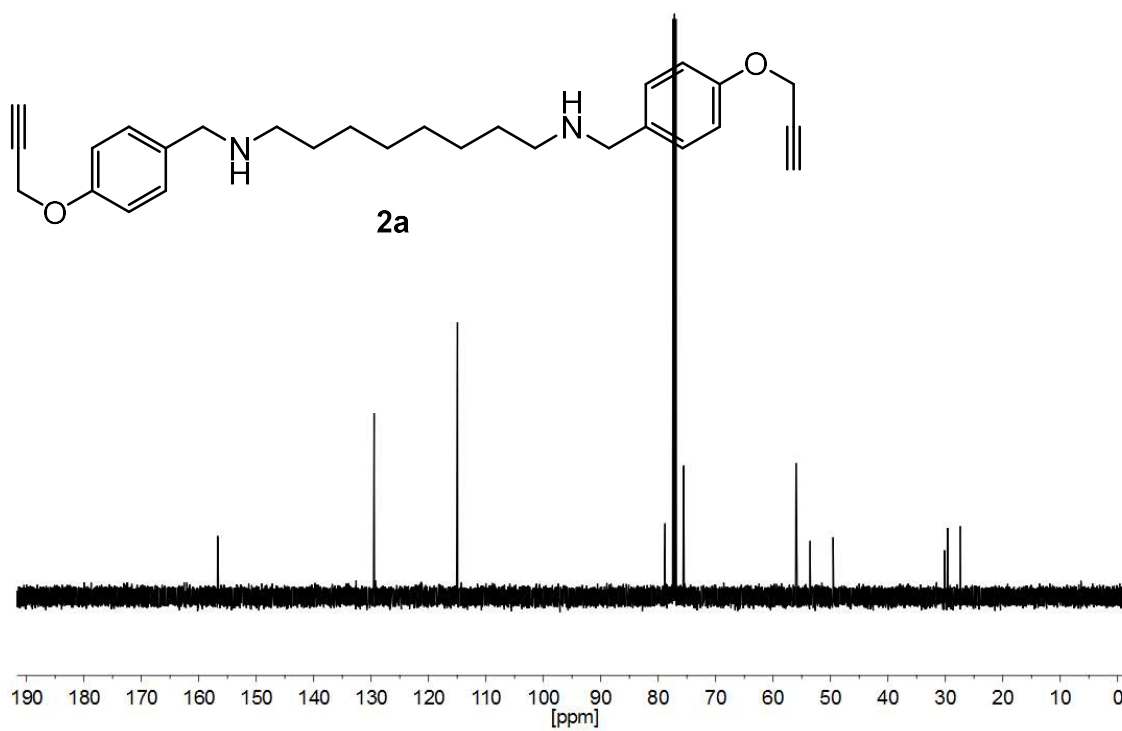

***N,N'*-Bis[4-(prop-2-inyloxy)phenylmethyl]decane-1,10-diyl diamine (2b)**

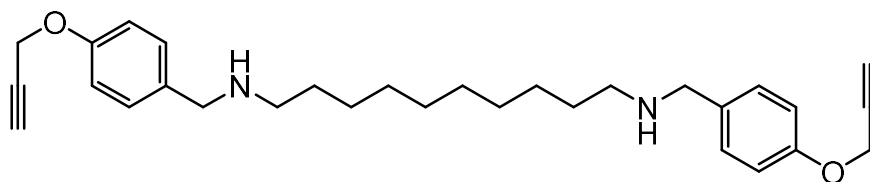

**2b**

Under nitrogen atmosphere, 1,10-diaminodecane (1.08 g, 6.25 mmol) and 4-(prop-2-inyloxy)benzaldehyde [1] **1** (2.00 g, 12.5 mmol) were dissolved in dry methanol (80 mL). The solution was stirred at room temp. for 2 h resulting in a precipitation of a colorless solid. Next sodium borohydride (3.91 g, 103 mmol) was added in portions at 0 °C. The mixture was stirred for 4 h at 0 °C and then for another 16 h at room temp. The clear solution was carefully mixed with water (30 mL) and the solvent was removed in vacuo. The aqueous layer was extracted with dichloromethane (3 x 50 mL). The organic layer was dried over magnesium sulfate and the solvent was removed in vacuo. A pale yellow solid was obtained.

**Yield:** 2.60 g (5.64 mmol, 90 %).

**Melting point:** 71 °C.

**<sup>1</sup>H-NMR** (500 MHz, CDCl<sub>3</sub>):  $\delta$  = 7.29-7.20 (m, 4 H, Ar-*H*-2,6), 6.98-6.89 (m, 4 H, Ar-*H*-3,5), 4.68 (d, <sup>4</sup>*J* = 2.4 Hz, 4 H, Ar-OCH<sub>2</sub>), 3.72 (s, 4 H, Ar-CH<sub>2</sub>), 2.60 (t, <sup>3</sup>*J* = 7.1 Hz, 4 H, Ar-CH<sub>2</sub>NHCH<sub>2</sub>), 2.51 (t, <sup>4</sup>*J* = 2.4 Hz, 2 H, CH), 1.57-1.39 (m, 4 H, NHCH<sub>2</sub>CH<sub>2</sub>), 1.25-1.26 (m, 12 H, NHCH<sub>2</sub>CH<sub>2</sub>CH<sub>2</sub>CH<sub>2</sub>CH<sub>2</sub>) ppm.

**<sup>13</sup>C-NMR** (125 MHz, CDCl<sub>3</sub>):  $\delta$  = 156.7 (s, Ar-C-4), 133.5 (s, Ar-C-1), 129.4 (d, Ar-C-2,6), 114.9 (d, Ar-C-3,5), 78.8 (s, CCH), 75.6 (d, CH), 56.0 (t, OCH<sub>2</sub>), 53.6 (t, Ar-CH<sub>2</sub>), 49.6 (t, Ar-CH<sub>2</sub>NHCH<sub>2</sub>), 30.2 (t, NHCH<sub>2</sub>CH<sub>2</sub>), 29.67 (t, NHCH<sub>2</sub>CH<sub>2</sub>CH<sub>2</sub>CH<sub>2</sub>), 29.65 (t, NHCH<sub>2</sub>CH<sub>2</sub>CH<sub>2</sub>CH<sub>2</sub>CH<sub>2</sub>), 27.5 (t, NHCH<sub>2</sub>CH<sub>2</sub>CH<sub>2</sub>) ppm.

**IR** (ATR):  $\tilde{\nu}$  = 3288 (w, C≡CH), 3260 (w, NH), 2919 (m, aliph. CH), 1509, 1454 (s, arom.), 1235, 1029 (s, CO), 812 (s, 1,4-disubst.) cm<sup>-1</sup>.

**MS** (HR-ESI): C<sub>30</sub>H<sub>41</sub>N<sub>2</sub>O<sub>2</sub> calcd. *m/z* = 461.3163, found *m/z* = 461.3158 ( $\Delta$  = -1.06 ppm).

**Elemental analysis:** C<sub>30</sub>H<sub>40</sub>N<sub>2</sub>O<sub>2</sub>•0.2 H<sub>2</sub>O: calcd. C 77.46, H 8.77, N 6.02, found C 77.66, H 8.78, N 6.02.

20180522-33-L505Duden\_7457  
 Position 33, Mitarbeiter Duden, Sample TD - P - 231, Menge ~ 9.0 mg/CDCl<sub>3</sub>, Re kein

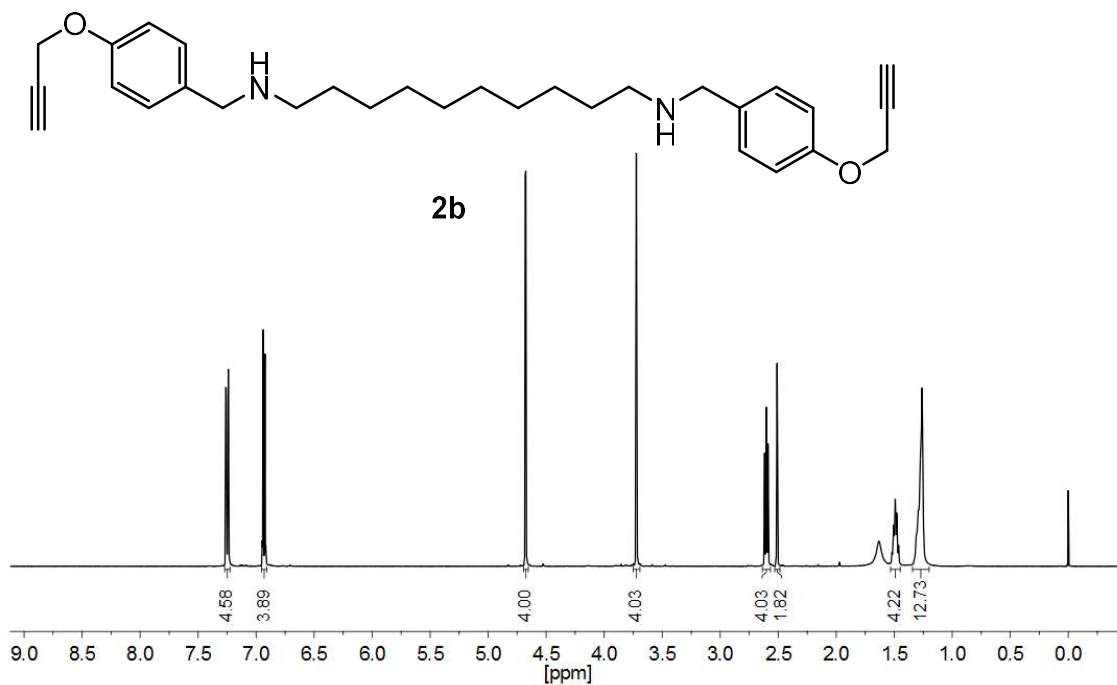

20180522-33-L505Duden\_7457  
 Position 33, Mitarbeiter Duden, Sample TD - P - 231, Menge ~ 9.0 mg/CDCl<sub>3</sub>, Re kein

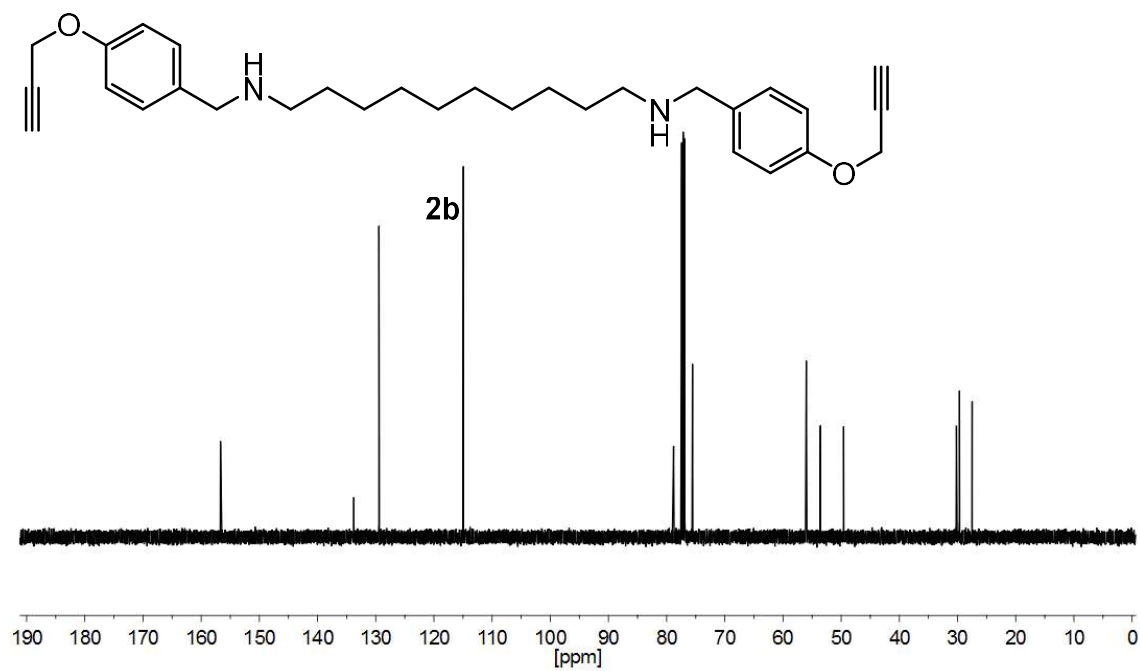

***N,N'*-Bis[4-(prop-2-ynyloxy)phenylmethyl]octane-1,8-diylidinium  
bis(hexafluorophosphate) (3a)**

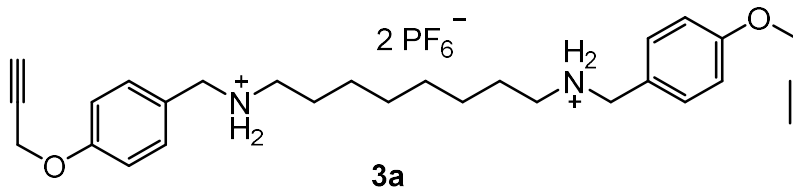

The secondary amine **2a** (2.47 g, 5.72 mmol) was dissolved in ethanol (50 mL) and then mixed with concentrated hydrochloric acid (5 mL). The suspension was stirred for 2 h at room temp. and then filtered. The colorless solid was dried in vacuo. The hydrochloride was suspended in acetone (75 mL) and mixed with an aqueous saturated  $\text{NH}_4\text{PF}_6$  solution until a clear solution was obtained. The solvent was then removed in vacuo and the residue stirred in water (200 mL) for 2 h. The colorless solid was filtered and dried in vacuo.

**Yield:** 3.07 g (4.24 mmol, 74 %).

**Melting point:** 185 °C.

**$^1\text{H-NMR}$**  (500 MHz,  $\text{MeOD-}d_4$ ):  $\delta$  = 7.42 (d,  $^3J$  = 8.7 Hz, 4 H, Ar-*H*-2,6), 7.07 (d,  $^3J$  = 8.7 Hz, 4 H, Ar-*H*-3,5), 4.77 (d,  $^4J$  = 2.4 Hz, 4 H, Ar- $\text{OCH}_2$ ), 4.13 (s, 4 H, Ar- $\text{CH}_2$ ), 3.05-2.98 (m, 4 H, Ar- $\text{CH}_2\text{NHCH}_2$ ), 2.95 (t,  $^4J$  = 2.4 Hz, 2 H, CH), 1.70 (s, 4 H,  $\text{NHCH}_2\text{CH}_2$ ), 1.39 (s, 8 H,  $\text{NHCH}_2\text{CH}_2\text{CH}_2\text{CH}_2$ ) ppm.

**$^{13}\text{C-NMR}$**  (125 MHz,  $\text{MeOD-}d_4$ ):  $\delta$  = 160.1 (s, Ar-C-4), 132.5 (d, Ar-C-2,6), 125.2 (s, Ar-C-1), 116.6 (d, Ar-C-3,5), 79.4 (s, CCH), 77.0 (d, CH), 56.7 (t,  $\text{OCH}_2$ ), 51.8 (t, Ar- $\text{CH}_2$ ), 48.4 (t, Ar- $\text{CH}_2\text{NHCH}_2$ ), 29.8 (t,  $\text{NHCH}_2\text{CH}_2\text{CH}_2\text{CH}_2$ ), 27.4 (t,  $\text{NHCH}_2\text{CH}_2\text{CH}_2$ ), 27.1 (t,  $\text{NHCH}_2\text{CH}_2$ ) ppm.

**IR** (ATR):  $\tilde{\nu}$  = 3287 (w,  $\text{C}\equiv\text{CH}$ ), 2936 (w, aliph. CH), 2864 (w,  $\text{NH}_2^+$ ), 1517 (m, arom.), 1245, 1025 (m, CO), 829 (s, 1,4-disubst.), 556 (s,  $\text{PF}_6$ )  $\text{cm}^{-1}$ .

**MS** (HR-ESI):  $\text{C}_{28}\text{H}_{37}\text{N}_2\text{O}_2$  calcd.  $m/z$  = 433.2850, found  $m/z$  = 433.2843 ( $\Delta$  = -1.43 ppm).

**Elemental analysis:**  $\text{C}_{28}\text{H}_{38}\text{N}_2\text{O}_2\text{P}_2$ : calcd. C 46.42, H 5.29, N 3.87, found C 46.35, H 5.27, N 3.98.

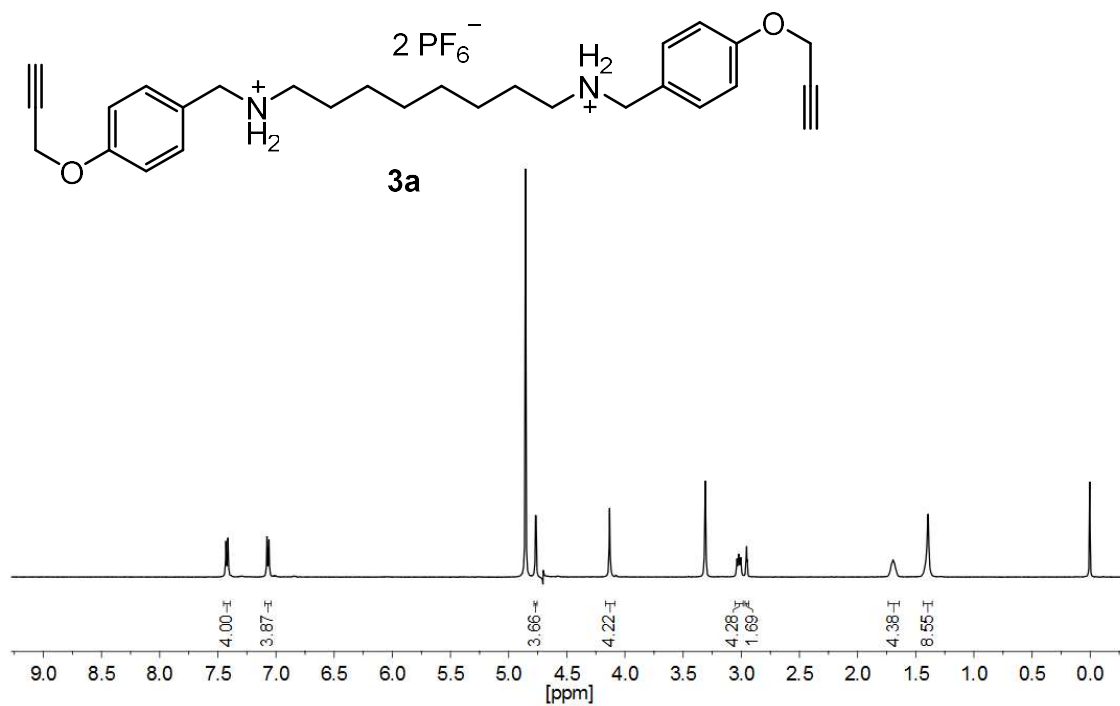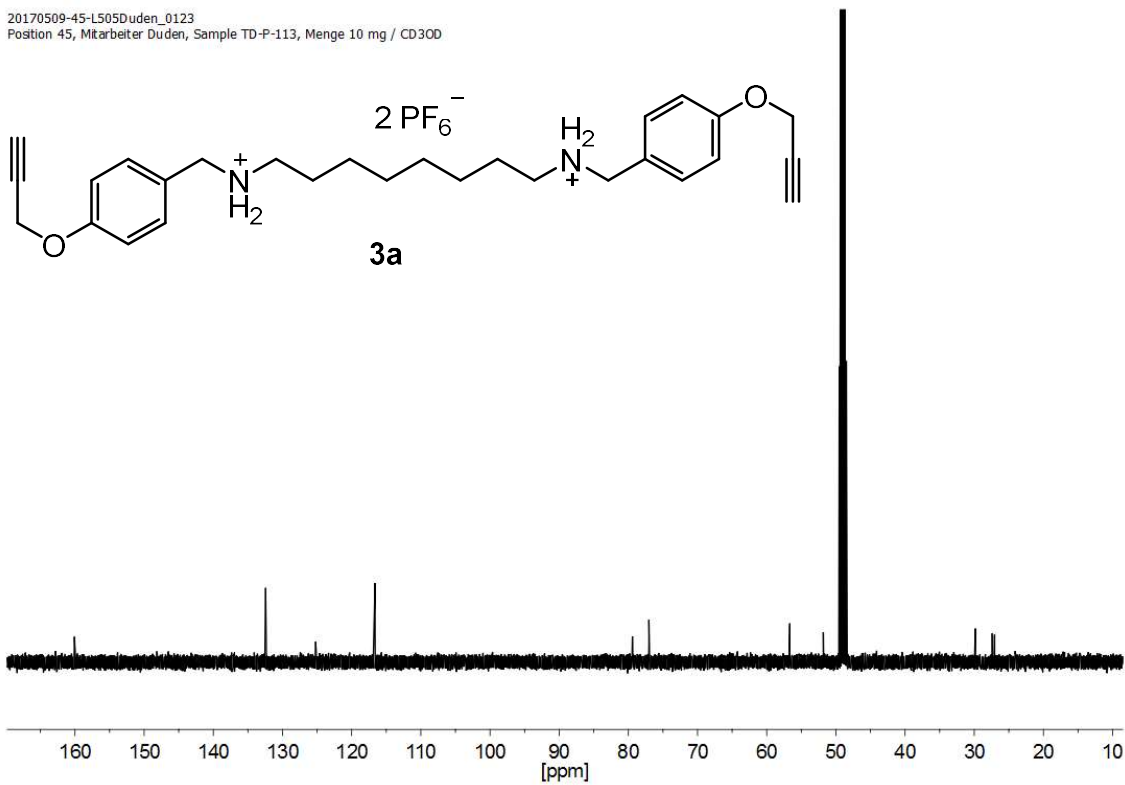

***N,N'*-Bis[4-(prop-2-ynyloxy)phenylmethyl]decane-1,10-diylidinium  
bis(hexafluorophosphate) (**3b**)**

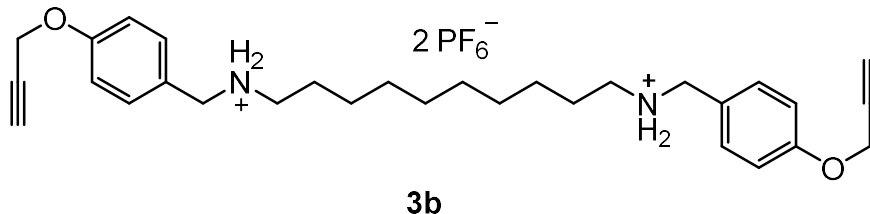

The secondary amine **2b** (2.59 g, 5.62 mmol) was dissolved in ethanol (50 mL) and then mixed with concentrated hydrochloric acid (5 mL). The suspension was stirred for 2 h at room temp. and then filtered. The colorless solid was dried in vacuo. The hydrochloride was suspended in acetone (75 mL) and mixed with an aqueous saturated  $\text{NH}_4\text{PF}_6$  solution until a clear solution was obtained. The solvent was removed in vacuo and the residue stirred in water (200 mL) for 2 h. The colorless solid was filtered and dried in vacuo.

**Yield:** 3.64 g (4.84 mmol, 86 %).

**Melting point:** 202 °C.

**$^1\text{H-NMR}$**  (500 MHz,  $\text{MeOD-}d_4$ ):  $\delta$  = 7.45-7.40 (m, 4 H, Ar-*H*-2,6), 7.10-7.05 (m, 4 H, Ar-*H*-3,5), 4.77 (d,  $^4J$  = 2.4 Hz, 4 H, Ar- $\text{OCH}_2$ ), 4.13 (s, 4 H, Ar- $\text{CH}_2$ ), 3.05-2.99 (m, 4 H, Ar- $\text{CH}_2\text{NHCH}_2$ ), 2.95 (t,  $^4J$  = 2.4 Hz, 2 H, CH), 1.73-1.65 (m, 4 H,  $\text{NHCH}_2\text{CH}_2$ ), 1.42-1.33 (m, 12 H,  $\text{NHCH}_2\text{CH}_2\text{CH}_2\text{CH}_2\text{CH}_2$ ) ppm.

**$^{13}\text{C-NMR}$**  (125 MHz,  $\text{MeOD-}d_4$ ):  $\delta$  = 160.1 (s, Ar-C-4), 132.4 (d, Ar-C-2,6), 125.2 (s, Ar-C-1), 116.6 (d, Ar-C-3,5), 79.4 (s, CCH), 77.0 (d, CH), 56.7 (t,  $\text{OCH}_2$ ), 51.8 (t, Ar- $\text{CH}_2$ ), 48.5 (t, Ar- $\text{CH}_2\text{NHCH}_2$ ), 30.3 (t,  $\text{NHCH}_2\text{CH}_2\text{CH}_2$ ), 30.1 (t,  $\text{NHCH}_2\text{CH}_2\text{CH}_2\text{CH}_2$ ), 27.6 (t,  $\text{NHCH}_2\text{CH}_2\text{CH}_2\text{CH}_2\text{CH}_2$ ), 27.1 (t,  $\text{NHCH}_2\text{CH}_2$ ) ppm.

**IR** (ATR):  $\tilde{\nu}$  = 3288 (w,  $\text{C}\equiv\text{CH}$ ), 2925 (w, aliph. CH), 2856 (w,  $\text{NH}_2^+$ ), 1519 (m, arom.), 1226, 1029 (m, CO), 815 (s, 1,4-disubst.), 556 (s,  $\text{PF}_6$ )  $\text{cm}^{-1}$ .

**MS** (HR-ESI):  $\text{C}_{30}\text{H}_{41}\text{N}_2\text{O}_2$  calcd.  $m/z$  = 461.3163, found  $m/z$  = 461.3156 ( $\Delta$  = -1.42 ppm).

**Elemental analysis:**  $\text{C}_{30}\text{H}_{42}\text{N}_2\text{O}_2\text{P}_2$ : calcd. C 47.88, H 5.63, N 3.72, found C 48.16, H 5.73, N 3.81.



20170505-9-L505Duden\_0080  
 Position 9, Mitarbeiter Duden, Sample TD-P-111, Menge 10 mg / CD300

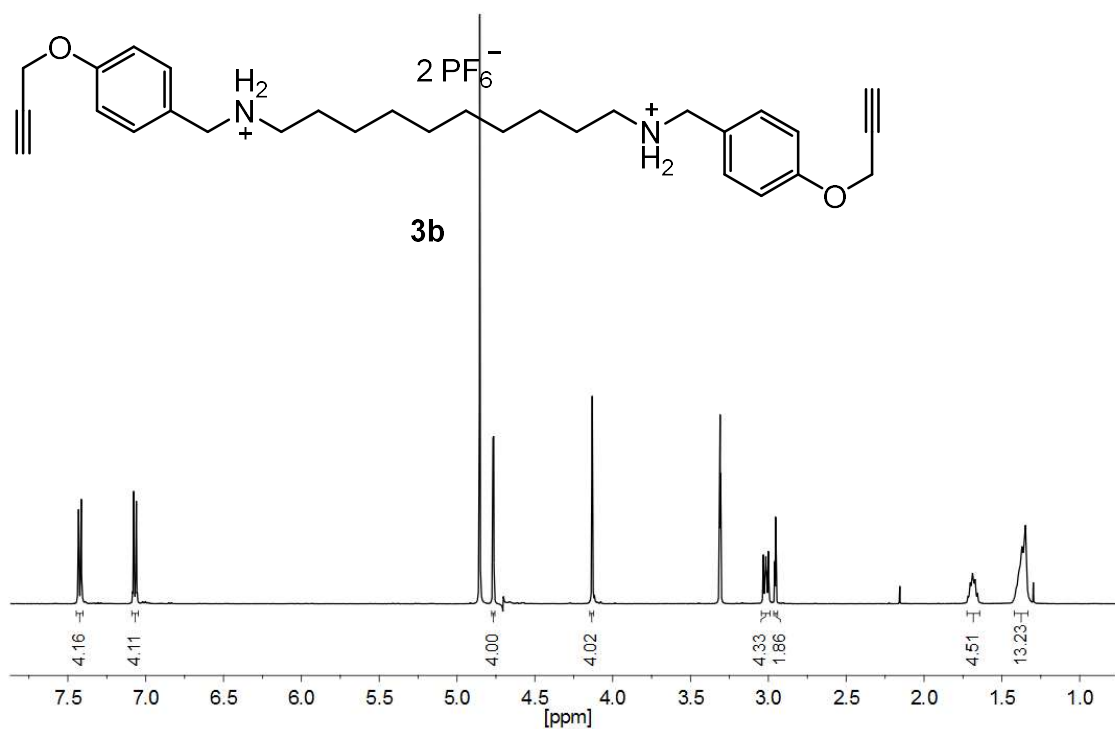

20170505-9-L505Duden\_0080  
 Position 9, Mitarbeiter Duden, Sample TD-P-111, Menge 10 mg / CD300

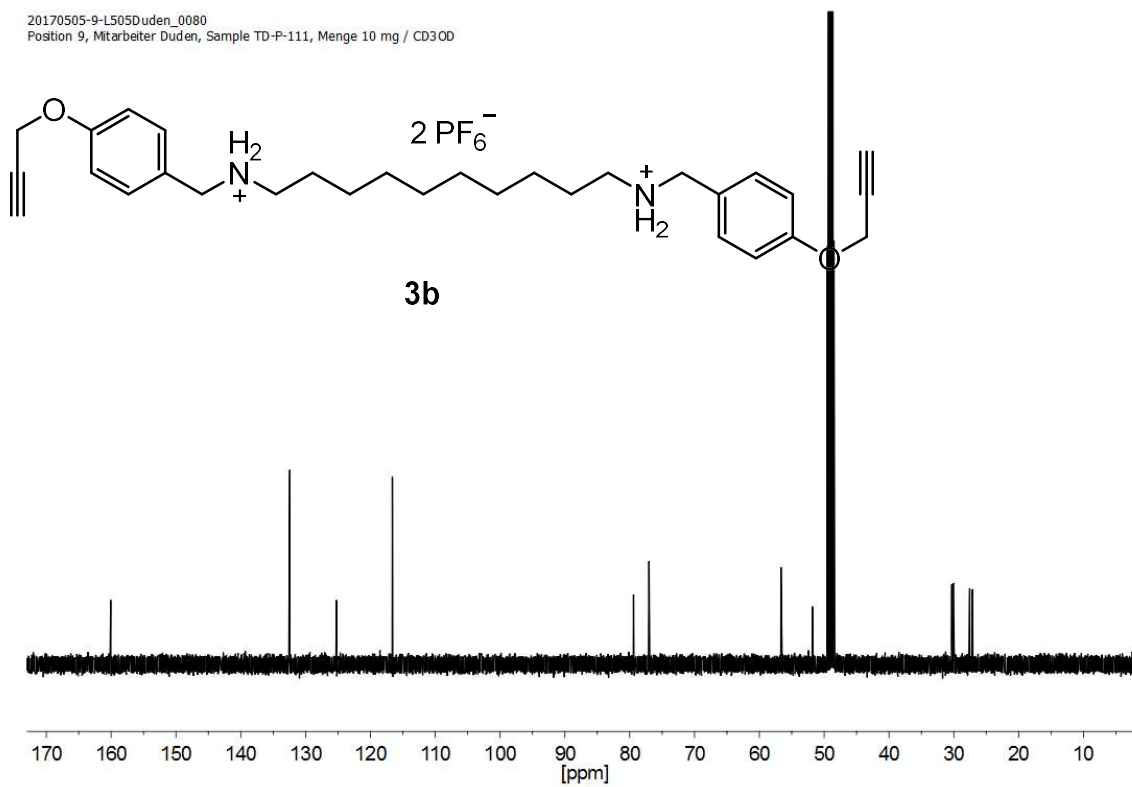

***N,N'*-{4,4'-[Butane-1,4-diylbis(oxy)]bis(4,1-phenylmethyl)}bis[4-(prop-2-inyloxy)phenylmethanamine] (6)**

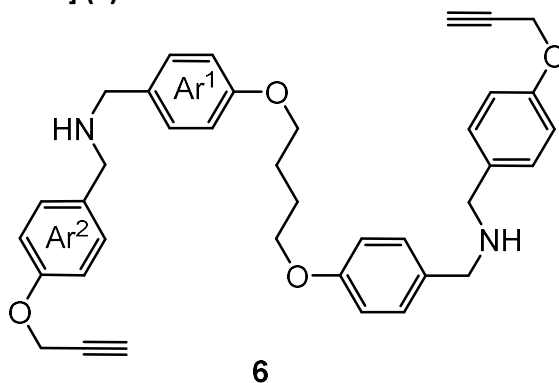

Under nitrogen atmosphere, 4-(prop-2-inyloxy)benzylamine [2] (**5**, 1.30 g, 8.06 mmol) and 1,4-bis(4-formylphenoxy)butane [3] (**4**, 1.20 g, 4.03 mmol) were dissolved in dry methanol (75 mL) and stirred under reflux for 3 h. The suspension was then cooled down to 0 °C and mixed with portions of sodium borohydride (total: 2.40 g, 63.0 mmol). The suspension was stirred for 1 h at 0 °C and then for 16 h at room temp. Water (25 mL) was added and methanol was removed in vacuo. The aqueous layer was extracted with dichloromethane (4 x 75 mL). The organic layer was dried with sodium sulfate, filtered and the solvent was removed in vacuo. A colorless oil was obtained.

**Yield:** 2.10 g (3.57 mmol, 89 %).

**<sup>1</sup>H-NMR** (500 MHz, CDCl<sub>3</sub>): δ = 7.32-7.17 (m, 8 H, Ar<sup>1</sup>-H-2,6, Ar<sup>2</sup>-H-2,6), 6.96-6.91 (m, 4 H, Ar<sup>1</sup>-H-3,5), 6.89-6.83 (m, 4 H, Ar<sup>2</sup>-H-3,5), 4.68 (d, <sup>4</sup>J = 2.4 Hz, 4 H, OCH<sub>2</sub>CCH), 4.06-3.99 (m, 4 H, OCH<sub>2</sub>CH<sub>2</sub>), 3.74-3.71 (m, 8 H, CH<sub>2</sub>NHCH<sub>2</sub>), 2.51 (t, <sup>4</sup>J = 2.4 Hz, 2 H, CCH), 1.99-1.95 (m, 4 H, OCH<sub>2</sub>CH<sub>2</sub>) ppm.

**<sup>13</sup>C-NMR** (125 MHz, CDCl<sub>3</sub>): δ = 158.2 (s, Ar<sup>1</sup>-C-4), 156.7 (s, Ar<sup>2</sup>-C-4), 133.6 (s, Ar<sup>2</sup>-C-1), 132.5 (s, Ar<sup>1</sup>-C-1), 129.5 (d, Ar<sup>1</sup>-C-2,6, Ar<sup>2</sup>-C-2,6), 114.9 (d, Ar<sup>2</sup>-C-3,5), 114.5 (d, Ar<sup>1</sup>-C-3,5), 78.8 (s, CCH), 75.6 (d, CCH), 67.6 (t, OCH<sub>2</sub>CH<sub>2</sub>), 56.0 (t, OCH<sub>2</sub>CCH), 52.6 (t, CH<sub>2</sub>NHCH<sub>2</sub>), 52.5 (t, CH<sub>2</sub>NHCH<sub>2</sub>), 26.2 (CH<sub>2</sub>CH<sub>2</sub>) ppm.

**IR** (ATR):  $\tilde{\nu}$  = 3292 (s, C≡CH), 2929, 2874, 2823 (m, aliph. CH), 2134 (w, C≡C), 1609, 1508 (s, arom.), 1234, 1214, 1166, 1026 (s, CO), 820 (s, 1,4-disubst.) cm<sup>-1</sup>.

**MS** (HR-ESI): C<sub>38</sub>H<sub>43</sub>N<sub>2</sub>O<sub>4</sub> calcd. *m/z* = 589.3061, found *m/z* = 589.3061 (Δ = -0.03 ppm).

**Elemental analysis:** C<sub>38</sub>H<sub>42</sub>N<sub>2</sub>O<sub>4</sub>•0.2 H<sub>2</sub>O: calcd. C 76.93, H 6.88, N 4.72, found C 76.80, H 6.94, N 4.42.

170302-19-L503Dude\_1842  
 Position 19, Mitarbeiter Duden, Probe TD - P - 76, Menge 10.0 mg/CDCl<sub>3</sub>

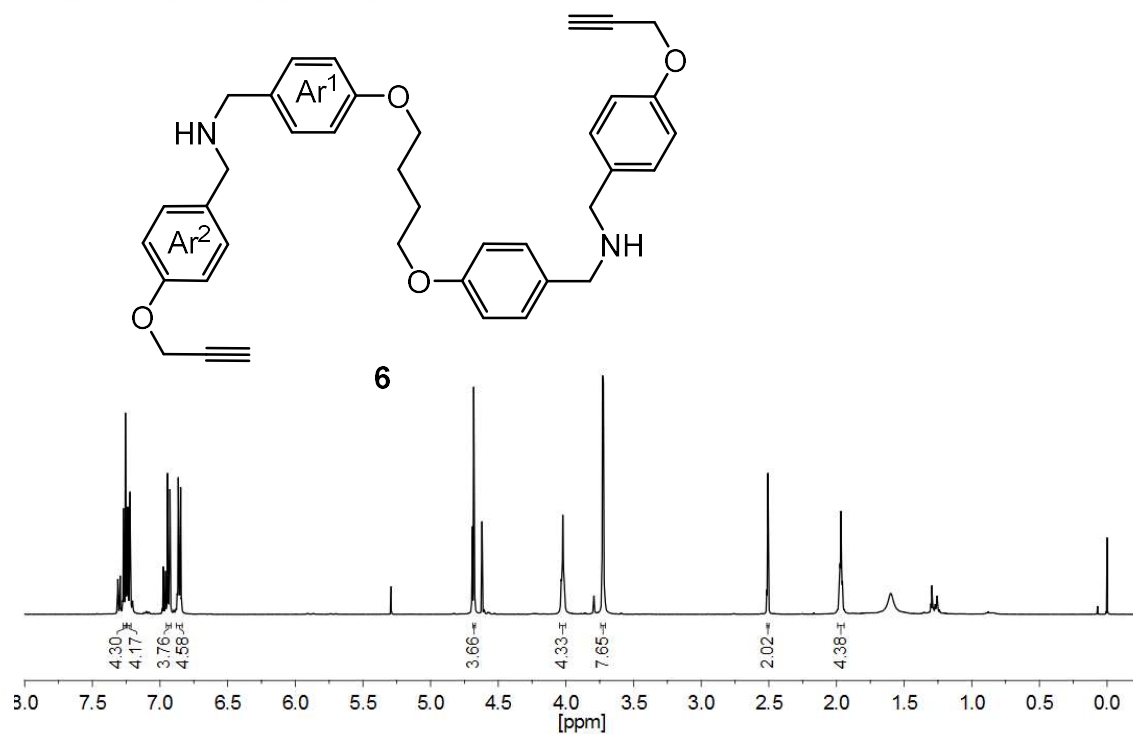

170302-19-L503Dude\_1842  
 Position 19, Mitarbeiter Duden, Probe TD - P - 76, Menge 10.0 mg/CDCl<sub>3</sub>

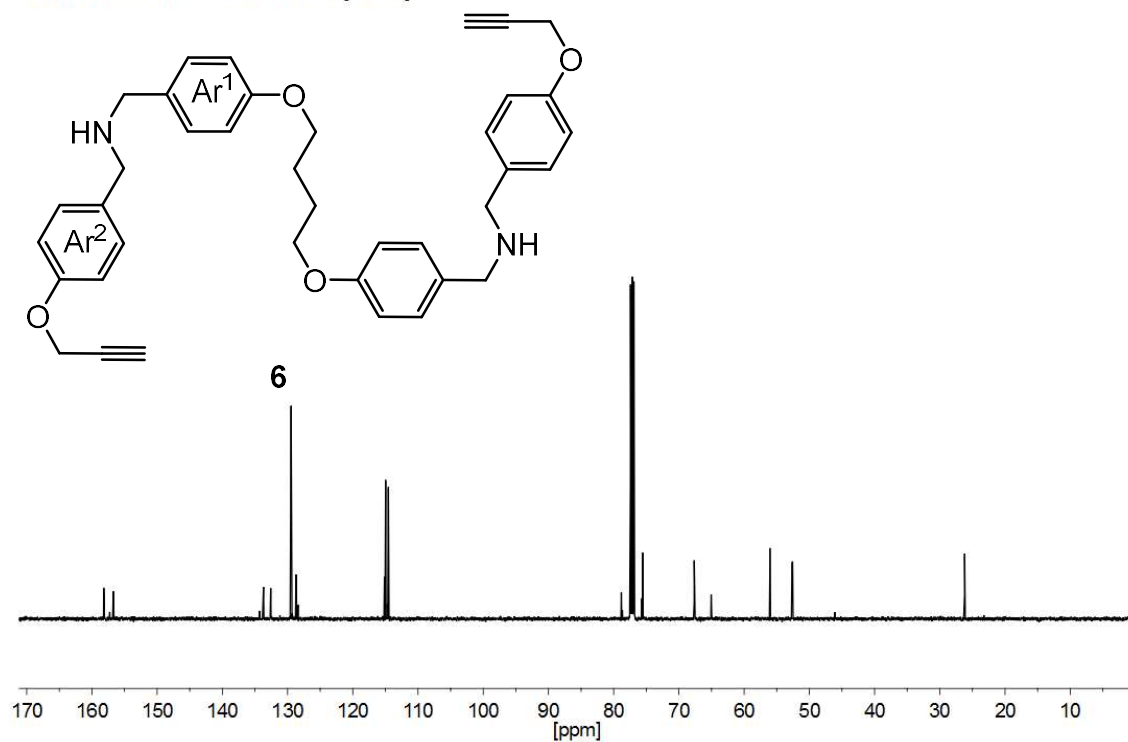

***N,N'*-{4,4'-[Butane-1,4-diylbis(oxy)]bis(4,1-phenylmethyl)}bis[4-(prop-2-inyloxy)phenylmethylinium] bis(hexafluorophosphate) (7)**

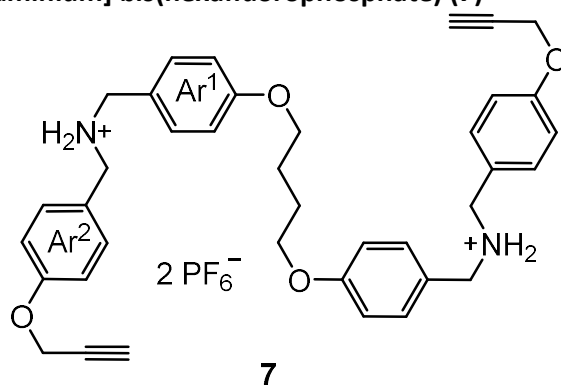

Amine **6** (1.54 g, 2.62 mmol) was dissolved in ethanol (100 mL) and mixed with concentrated hydrochloric acid (4 mL). The resulting suspension was stirred for 2 h at room temp. and was then filtered. The colorless solid was dried in vacuo, then suspended in acetone (100 mL) and treated with aqueous saturated  $\text{NH}_4\text{PF}_6$  solution until a clear solution was obtained. The solvent was then removed in vacuo. The residue was suspended in water (100 mL) and stirred at room temp. for 1 h. Filtration gave a colorless solid which was dried in vacuo.

**Yield:** 2.30 mg (2.60 mmol, 99 %).

**Melting point:** 200 °C.

**$^1\text{H-NMR}$**  (500 MHz,  $\text{DMSO-}d_6$ ):  $\delta$  = 8.97 (s, 4 H,  $\text{NH}_2$ ), 7.41 (d,  $^3J$  = 8.8 Hz, 4 H,  $\text{Ar}^2\text{-H-2,6}$ ), 7.39 (d,  $^3J$  = 8.8 Hz, 4 H,  $\text{Ar}^1\text{-H-2,6}$ ), 7.05 (d,  $^3J$  = 8.8 Hz, 4 H,  $\text{Ar}^2\text{-H-3,5}$ ), 7.00 (d,  $^3J$  = 8.8 Hz, 4 H,  $\text{Ar}^1\text{-H-3,5}$ ), 4.83 (d,  $^4J$  = 2.3 Hz, 4 H,  $\text{OCH}_2\text{CCH}$ ), 4.11-4.03 (m, 12 H,  $\text{H}_2\text{CNH}_2\text{CH}_2$ ,  $\text{OCH}_2\text{CH}_2$ ), 3.57 (t,  $^4J$  = 2.3 Hz, 2 H,  $\text{CCH}$ ), 1.87 (s, 4 H,  $\text{OCH}_2\text{CH}_2$ ) ppm.

**$^{13}\text{C-NMR}$**  (125 MHz,  $\text{DMSO-}d_6$ ):  $\delta$  = 159.1 (s,  $\text{Ar}^1\text{-C-4}$ ), 157.6 (s,  $\text{Ar}^2\text{-C-4}$ ), 131.54 (d,  $\text{Ar}^1\text{-C-2,6}$ ), 131.47 (d,  $\text{Ar}^2\text{-C-2,6}$ ), 124.4 (s,  $\text{Ar}^2\text{-C-1}$ ), 123.5 (s,  $\text{Ar}^1\text{-C-1}$ ), 115.0 (d,  $\text{Ar}^2\text{-C-3,5}$ ), 114.5 (d,  $\text{Ar}^1\text{-C-3,5}$ ), 79.0 (s,  $\text{CCH}$ ), 78.3 (d,  $\text{CCH}$ ), 67.3 (t,  $\text{OCH}_2\text{CH}_2$ ), 55.4 (t,  $\text{OCH}_2\text{CCH}$ ), 49.5 (t,  $\text{Ar}^2\text{-CH}_2\text{NH}_2$ ), 48.3 (t,  $\text{Ar}^1\text{-CH}_2\text{NH}_2$ ), 25.4 (t,  $\text{OCH}_2\text{CH}_2$ ) ppm.

**IR** (ATR):  $\tilde{\nu}$  = 3259 (w,  $\text{C}\equiv\text{CH}$ ), 1613, 1516 (m, arom.), 1249, 1183, 1024 (s, CO), 826 (s, 1,4-disubst.), 557 (s,  $\text{PF}_6$ )  $\text{cm}^{-1}$ .

**MS** (MALDI):  $m/z(\%)$  = 735.8 (5)  $[\text{M} - \text{PF}_6]^+$ , 613 (100), 589.8 (21)  $[\text{M} - 2\text{PF}_6 - \text{H}^+]^+$ .

170117-15-L501Dude\_1352  
 Position 15, Mitarbeiter Duden, Probe TD - P - 48, Menge 9.0 mg/DMSO-d6

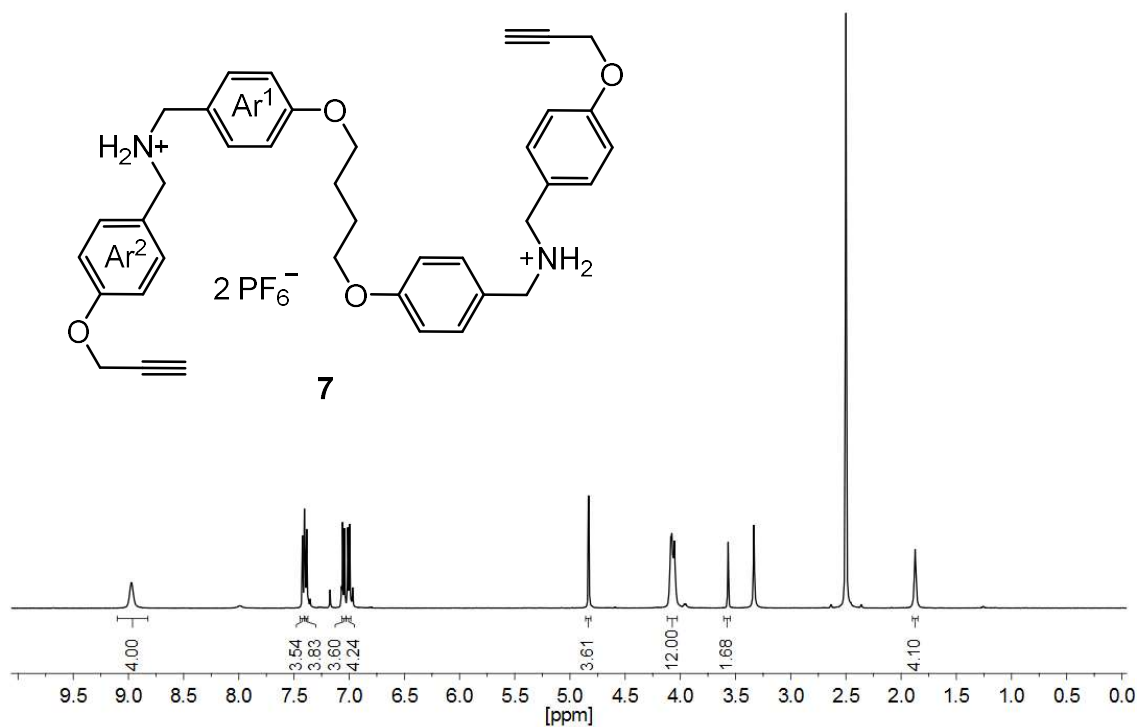

170117-15-L501Dude\_1352  
 Position 15, Mitarbeiter Duden, Probe TD - P - 48, Menge 9.0 mg/DMSO-d6

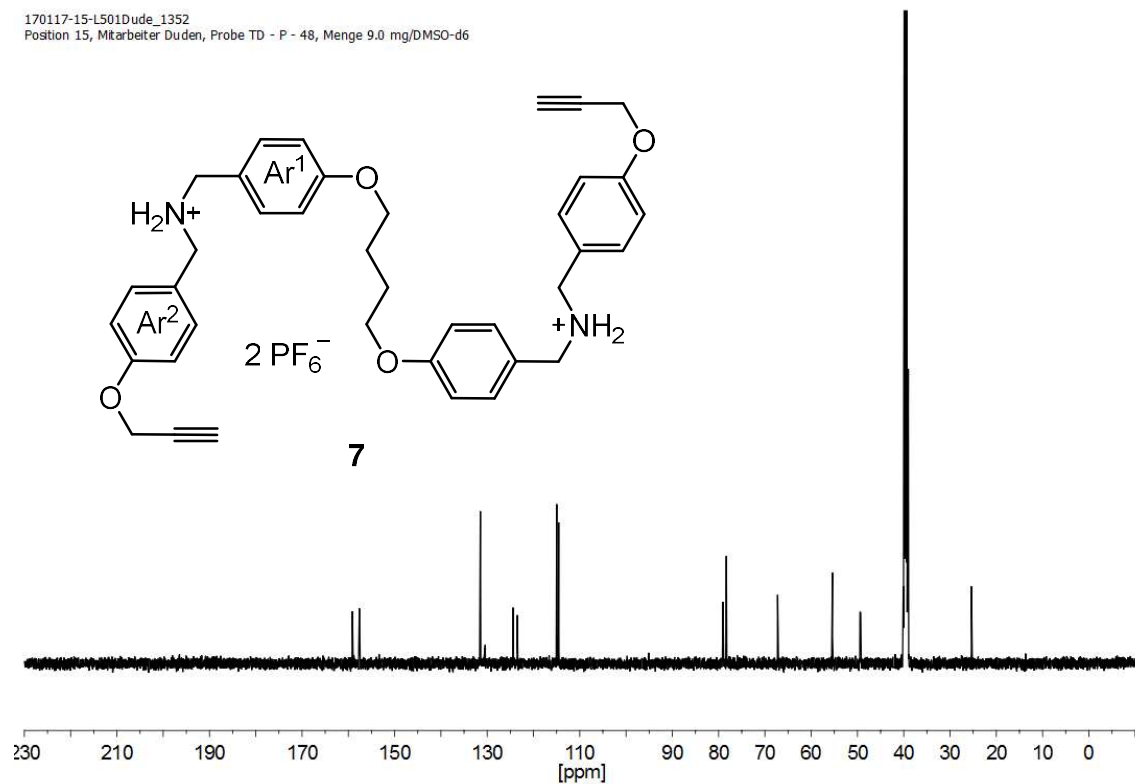

**[3]-*N,N'*-(Octane-1,8-diyl)-*N,N'*-bis{[4-({1-[3-(4-{tris[4-(dimethylethyl)phenyl]methyl}phenoxy)propyl]-1*H*-1,2,3-triazol-4-yl]methoxy}phenyl]methanaminium}-rotaxa-bis(1,12-[1,2]dibenzena-2,5,8,11,13,16,19,22-octaoadococaphan) bis(hexafluorophosphate) (14a)**

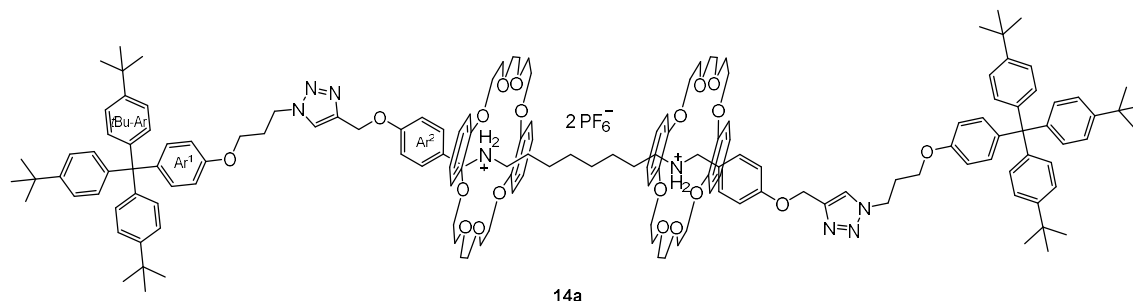

Under nitrogen atmosphere, axis **3a** (92.4 mg, 128  $\mu\text{mol}$ ) and DB24C8 (**13**, 144 mg, 321  $\mu\text{mol}$ ) were suspended in dry dichloromethane (50 mL). The suspension was stirred at room temp. until a clear solution was obtained. Then, stopper **11** [4] (150 mg, 255  $\mu\text{mol}$ ), tetrakis(acetonitrile)copper(I) hexafluorophosphate (95.1 mg, 255  $\mu\text{mol}$ ) and 2,6-dimethylpyridine (ca. 60  $\mu\text{L}$ ) were added. The yellow solution was stirred for 1 d at room temp. and then water (20 mL) was added. The aqueous layer was extracted with dichloromethane (3 x 30 mL) and the solvent was removed in vacuo. The residue was filtered through silica gel [dichloromethane/methanol (80 : 20)]. The solvent of the filtrate was removed in vacuo and the residue was purified by chromatography using silica gel [dichloromethane/methanol (1 : 0)  $\rightarrow$  (24 : 1),  $R_f$  = 0.05]. The yellow solid was dissolved in very little ethyl acetate and DB24C8 (**13**) precipitated. The solid was filtered off and the process repeated. Finally, the residue was cleaned again by chromatography on silica gel [dichloromethane/methanol (1 : 0)  $\rightarrow$  (24 : 1),  $R_f$  = 0.05]. A pale yellow solid was obtained.

**Yield:** 123 mg (43.9  $\mu\text{mol}$ , 34 %).

**Melting point:** 199  $^{\circ}\text{C}$ .

**$^1\text{H-NMR}$**  (600 MHz,  $\text{CDCl}_3$ ):  $\delta$  = 7.99 (br. s, 2 H,  $H_{\text{Tri}}$ ), 7.36 (d,  $^3J$  = 7.8 Hz, 4 H,  $\text{Ar}^2\text{-H-2,6}$ ), 7.22 (d,  $^3J$  = 8.6 Hz, 12 H,  $t\text{BuAr-H-3,5}$ ), 7.12-7.04 (m, 18 H,  $t\text{BuAr-H-2,6}$ ,  $\text{Ar}^1\text{-H-2,6}$ ), 6.92-6.81 (m, 20 H,  $\text{Ar}^2\text{-H-3,5}$ ,  $\text{Ar}_{\text{crown}}\text{-H-3,4,5,6}$ ), 6.75 (d,  $^3J$  = 8.8 Hz, 4 H,  $\text{Ar}^1\text{-H-3,5}$ ), 5.12 (br. s, 4 H,  $\text{Ar}^2\text{-O-CH}_2$ ), 4.63 (br. s, 4 H,  $\text{Tri-CH}_2\text{CH}_2$ ), 4.55-4.53 (m, 4 H,  $\text{Ar}^2\text{-CH}_2$ ), 4.25-4.18 (m, 8 H,  $\text{CH}_2\text{-crown}$ ), 4.10-4.05 (m, 8 H,  $\text{CH}_2\text{-crown}$ ), 3.99 (t,  $^3J$  = 5.2 Hz, 4 H,  $\text{Ar}^1\text{-OCH}_2$ ), 3.82-3.77 (m, 16 H,  $\text{CH}_2\text{-crown}$ ), 3.65-3.58 (m, 8 H,  $\text{CH}_2\text{-crown}$ ), 3.43-3.38 (m, 8 H,  $\text{CH}_2\text{-crown}$ ), 3.02-2.95 (m, 4 H,  $\text{NH}_2\text{CH}_2\text{CH}_2$ ), 2.44-2.38 (m, 4 H,  $\text{Tri-CH}_2\text{CH}_2$ ), 1.34-1.26 (m, 58 H,  $\text{CH}_3$ ,  $\text{NH}_2\text{CH}_2\text{CH}_2$ ), 0.87-0.81 (m, 4 H,  $\text{NH}_2\text{CH}_2\text{CH}_2\text{CH}_2$ ), 0.78-0.75 (m, 4 H,  $\text{NH}_2\text{CH}_2\text{CH}_2\text{CH}_2\text{CH}_2$ ) ppm.

**$^{13}\text{C-NMR}$**  (150 MHz,  $\text{CDCl}_3$ ):  $\delta$  = 158.9 (s,  $\text{Ar}^2\text{-C-1}$ ), 156.4 (s,  $\text{Ar}^1\text{-C-1}$ ), 148.5 (s,  $t\text{BuAr-C-4}$ ), 147.6 (s,  $\text{Ar}_{\text{crown}}\text{-C-1,2}$ ), 144.2 (s,  $t\text{BuAr-C-1}$ ), 140.2 (s,  $\text{Ar}^1\text{-C-4}$ ), 132.5 (d,  $t\text{BuAr-C-2,6}$ ), 131.5 (d,  $\text{Ar}^2\text{-C-3,5}$ ), 130.8 (d,  $\text{Ar}^1\text{-C-3,5}$ ), 125.3 (s,  $\text{Ar}^2\text{-C-4}$ ), 124.2 (d,  $t\text{BuAr-C-3,5}$ ), 121.9 (d,  $\text{Ar}_{\text{crown}}\text{-C-4,5}$ ), 114.9 (d,  $\text{Ar}^2\text{-C-2,6}$ ), 113.1 (d,  $\text{Ar}^1\text{-C-2,6}$ ), 112.9 (d,  $\text{Ar}_{\text{crown}}\text{-C-3,6}$ ), 70.9 (t,  $\text{CH}_2\text{-crown}$ ), 70.3 (t,  $\text{CH}_2\text{-crown}$ ), 68.4 (t,  $\text{CH}_2\text{-crown}$ ), 64.2 (s,  $\text{C}(t\text{BuAr})_3\text{Ar}^1$ ), 63.2 (t,  $\text{Ar}^1\text{-OCH}_2$ ), 61.7 (t,  $\text{Ar}^2\text{-OCH}_2$ ), 51.8 (t,  $\text{Ar}^2\text{-CH}_2$ ), 49.0 (t,  $\text{NH}_2\text{CH}_2\text{CH}_2$ ), 47.4 (t,  $\text{Tri-CH}_2\text{CH}_2$ ), 34.4 (s,  $\text{CCH}_3$ ), 31.5 (q,  $\text{CH}_3$ ), 30.1 (t,  $\text{Ar}^1\text{-OCH}_2\text{CH}_2$ ), 28.7 (t,  $\text{NH}_2\text{CH}_2\text{CH}_2\text{CH}_2\text{CH}_2$ ), 26.7 (t,  $\text{NH}_2\text{CH}_2\text{CH}_2\text{CH}_2$ ), 26.4 (t,  $\text{NH}_2\text{CH}_2\text{CH}_2$ ) ppm.

The signals Tri-C-4, 5 could not be found.

**IR** (ATR):  $\tilde{\nu}$  = 2955 (w, aliph. CH), 2870 (w,  $\text{NH}_2^+$ ), 1504, 1454 (m, arom.), 1249, 1107, 1054 (m, CO), 837 (s, 1,4-disubst.), 745 (m, 1,2-disubst.), 557 (s,  $\text{PF}_6^-$ )  $\text{cm}^{-1}$ .

**MS** (HR-ESI):  $\text{C}_{156}\text{H}_{200}\text{N}_8\text{O}_{20}$  calcd.  $m/z$  = 1252.7434, found  $m/z$  = 1252.7434 ( $\Delta$  = 0.02 ppm).

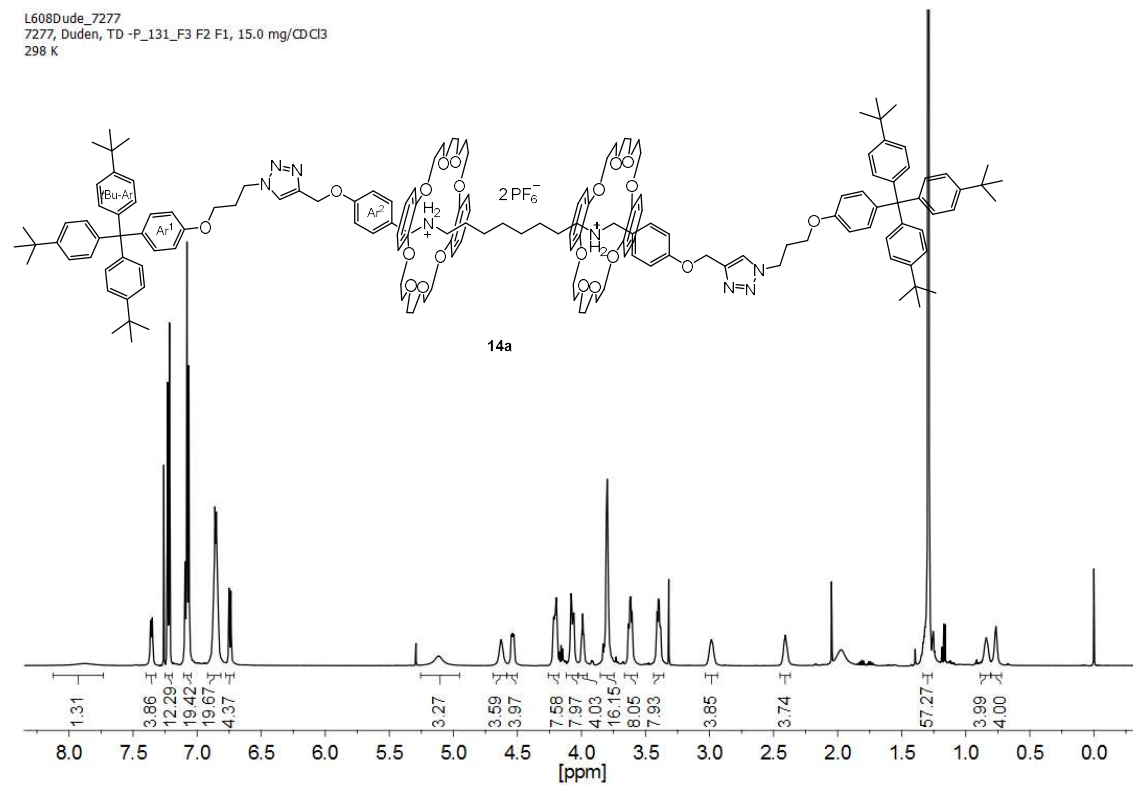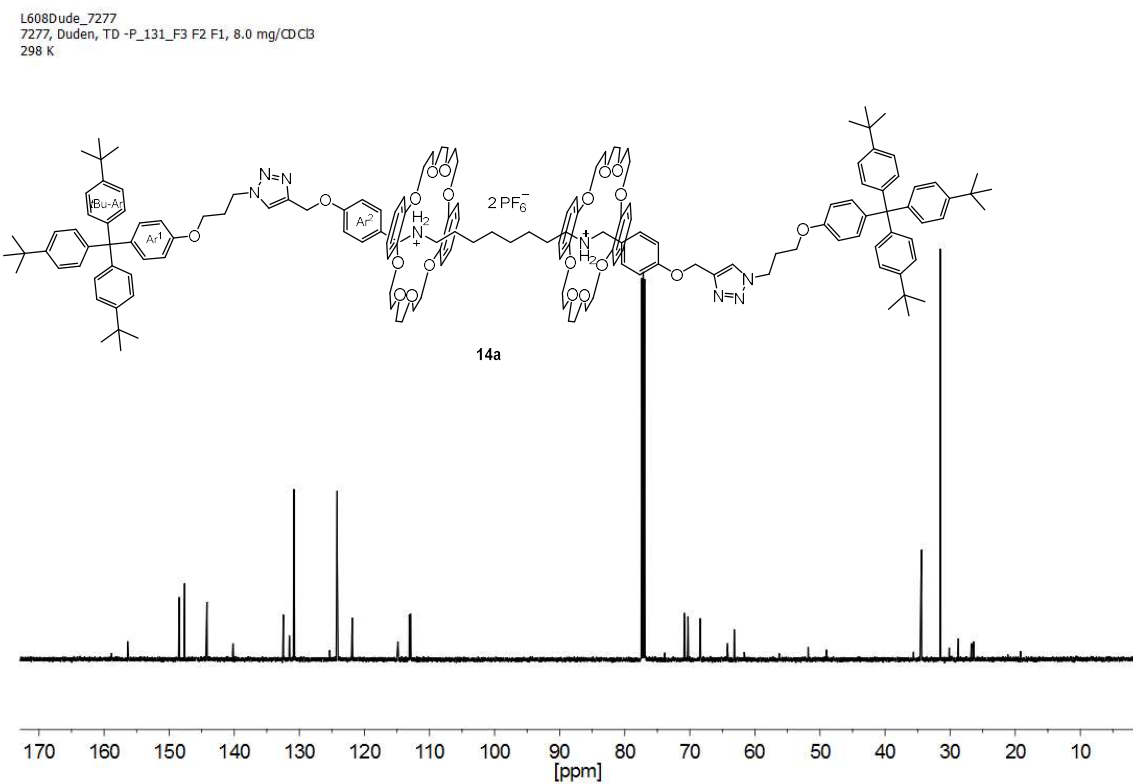

**[3]-4,4'-[Octane-1,8-diylbis(azaniumdiylmethylene-4,1-phenylenoxymethylene)]-bis{3-methyl-1-[3-(4-{tris[4-(dimethylethyl)phenyl]methyl}phenoxy)propyl]-1*H*-1,2,3-triazol-3-ium}-rotaxa-bis(1,12-[1,2]dibenzena-2,5,8,11,13,16,19,22-octaoxadocosaphan) tetrakis(hexafluorophosphate) (**15a**)**

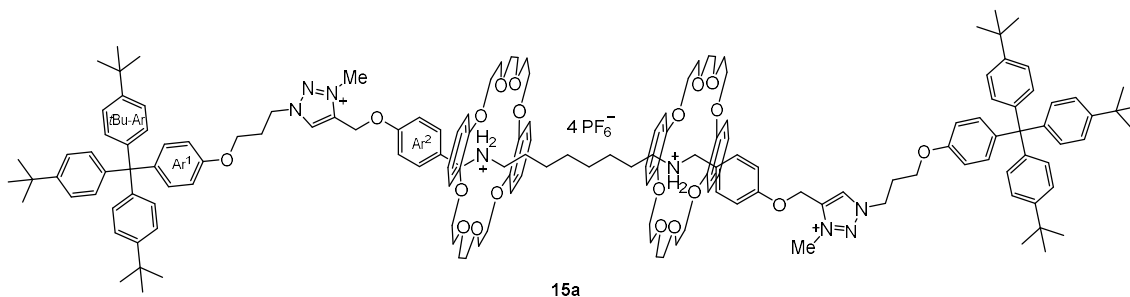

Rotaxane **14a** (30.0 mg, 10.7  $\mu\text{mol}$ ) was dissolved in methyl iodide (2 mL) and stirred for 4 d at room temp. The solvent was removed in vacuo and the residue was dissolved in dichloromethane (3 mL). An identical volume of saturated aqueous ammonium hexafluorophosphate solution was added and the mixture was stirred vigorously for 3 h at room temp. The aqueous layer was extracted with dichloromethane (2 x 10 mL). The organic layer was dried with sodium sulfate, filtered and the solvent was removed in vacuo. A pale yellow solid was obtained.

**Yield:** 33.6 mg (10.7  $\mu\text{mol}$ , quant.).

**Melting point:** 235  $^{\circ}\text{C}$ .

**$^1\text{H-NMR}$**  (600 MHz,  $\text{CDCl}_3$ ):  $\delta$  = 8.51 (s, 2 H,  $H_{\text{Tri}}$ ), 7.37 (d,  $^3J$  = 8.2 Hz, 4 H,  $\text{Ar}^2\text{-H-2,6}$ ), 7.21 (d,  $^3J$  = 8.7 Hz, 12 H,  $t\text{BuAr-H-3,5}$ ), 7.10-7.04 (m, 18 H,  $t\text{BuAr-H-2,6}$ ,  $\text{Ar}^1\text{-H-2,6}$ ), 6.86-6.78 (m, 20 H,  $\text{Ar}^2\text{-H-3,5}$ ,  $\text{Ar}_{\text{crown}}\text{-H-3,4,5,6}$ ), 6.70 (d,  $^3J$  = 8.8 Hz, 4 H,  $\text{Ar}^1\text{-H-3,5}$ ), 5.22 (s, 4 H,  $\text{Ar}^2\text{-O-CH}_2$ ), 4.76 (t,  $^3J$  = 7.0 Hz, 4 H,  $\text{Tri-CH}_2\text{CH}_2$ ), 4.52 (br. s, 4 H,  $\text{Ar}^2\text{-CH}_2$ ), 4.24 (s, 6 H,  $\text{CH}_3\text{Tri}$ ), 4.14-4.08 (m, 8 H,  $\text{CH}_2\text{-crown}$ ), 4.07-4.01 (m, 12 H,  $\text{CH}_2\text{-crown}$ ,  $\text{Ar}^1\text{-OCH}_2$ ), 3.82-3.72 (m, 16 H,  $\text{CH}_2\text{-crown}$ ), 3.60-3.53 (m, 8 H,  $\text{CH}_2\text{-crown}$ ), 3.44-3.37 (m, 8 H,  $\text{CH}_2\text{-crown}$ ), 2.99-2.92 (m, 4 H,  $\text{NH}_2\text{CH}_2\text{CH}_2$ ), 2.49-2.43 (m, 4 H,  $\text{Tri-CH}_2\text{CH}_2$ ), 1.32-1.25 (m, 58 H,  $\text{C}(\text{CH}_3)_3$ ,  $\text{NH}_2\text{CH}_2\text{CH}_2$ ), 0.85-0.79 (m, 4 H,  $\text{NH}_2\text{CH}_2\text{CH}_2\text{CH}_2\text{CH}_2$ ), 0.77-0.73 (m, 4 H,  $\text{NH}_2\text{CH}_2\text{CH}_2\text{CH}_2\text{CH}_2\text{CH}_2$ ) ppm.

**$^{13}\text{C-NMR}$**  (150 MHz,  $\text{CDCl}_3$ ):  $\delta$  = 157.6 (s,  $\text{Ar}^2\text{-C-1}$ ), 156.1 (s,  $\text{Ar}^1\text{-C-1}$ ), 148.5 (s,  $t\text{BuAr-C-4}$ ), 147.6 (s,  $\text{Ar}_{\text{crown}}\text{-C-1,2}$ ), 144.2 (s,  $t\text{BuAr-C-1}$ ), 140.32 (s,  $\text{Ar}^1\text{-C-4}$ ), 140.30 (s,  $\text{Tri-C-4}$ ), 132.5 (d,  $t\text{BuAr-C-2,6}$ ), 131.8 (d,  $\text{Ar}^2\text{-C-3,5}$ ), 130.8 (d,  $\text{Ar}^1\text{-C-3,5}$ ), 129.7 (d,  $\text{Tri-C-5}$ ), 126.5 (s,  $\text{Ar}^2\text{-C-4}$ ), 124.2 (d,  $t\text{BuAr-C-3,5}$ ), 121.8 (d,  $\text{Ar}_{\text{crown}}\text{-C-4,5}$ ), 115.0 (d,  $\text{Ar}^2\text{-C-2,6}$ ), 113.1 (d,  $\text{Ar}^1\text{-C-2,6}$ ), 112.9 (d,  $\text{Ar}_{\text{crown}}\text{-C-3,6}$ ), 70.8 (t,  $\text{CH}_2\text{-crown}$ ), 70.3 (t,  $\text{CH}_2\text{-crown}$ ), 68.4 (t,  $\text{CH}_2\text{-crown}$ ), 63.7 (s,  $\text{C}(t\text{BuAr})_3\text{Ar}^1$ ), 63.2 (t,  $\text{Ar}^1\text{-OCH}_2$ ), 58.3 (t,  $\text{Ar}^2\text{-OCH}_2$ ), 51.8 (t,  $\text{Ar}^2\text{-CH}_2$ , t,  $\text{Tri-CH}_2\text{CH}_2$ ), 48.9 (t,  $\text{NH}_2\text{CH}_2\text{CH}_2$ ), 38.7 (q,  $\text{CH}_3\text{Tri}$ ), 34.4 (s,  $\text{C}(\text{CH}_3)_3$ ), 31.5 (q,  $\text{C}(\text{CH}_3)_3$ ), 29.2 (t,  $\text{Ar}^1\text{-OCH}_2\text{CH}_2$ ), 28.7 (t,  $\text{NH}_2\text{CH}_2\text{CH}_2\text{CH}_2\text{CH}_2$ ), 26.7 (t,  $\text{NH}_2\text{CH}_2\text{CH}_2\text{CH}_2$ ) 26.4 (t,  $\text{NH}_2\text{CH}_2\text{CH}_2$ ) ppm.

**IR** (ATR):  $\tilde{\nu}$  = 2961 (w, aliph. CH), 1504, 1456 (m, arom.), 1246, 1228, 1105, 1055 (m, CO), 835 (s, 1,4-disubst.), 742 (m, 1,2-disubst.), 557 (s,  $\text{PF}_6$ )  $\text{cm}^{-1}$ .

**MS** (HR-ESI):  $\text{C}_{158}\text{H}_{206}\text{N}_8\text{O}_{20}$  calcd.  $m/z$  = 633.8832, found  $m/z$  = 633.8838 ( $\Delta$  = +1.00 ppm),  $\text{C}_{158}\text{H}_{206}\text{F}_6\text{N}_8\text{O}_{20}\text{P}$  calcd.  $m/z$  = 893.4991, found  $m/z$  = 893.4977 ( $\Delta$  = -0.61 ppm).



L608Dude\_7309  
7309, Duden, TD - P - 157, 15.0 mg/CDCl<sub>3</sub>  
298 K

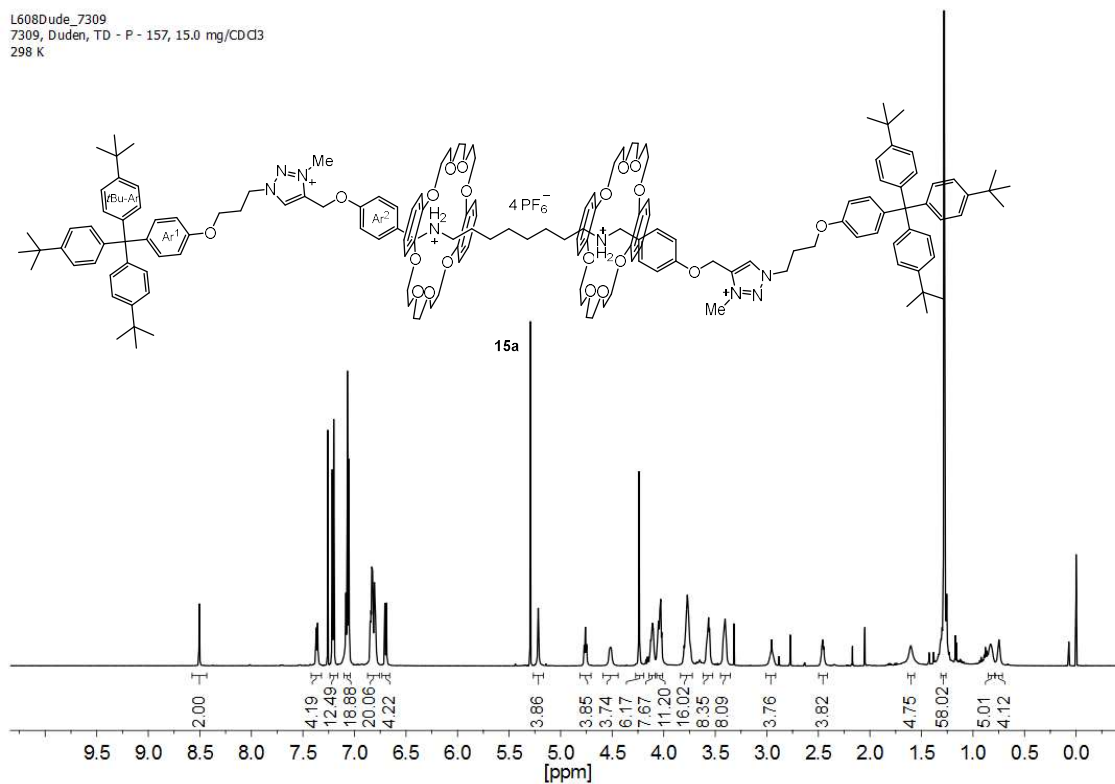

L608Dude\_7309  
7309, Duden, TD - P - 157, 15.0 mg/CDCl<sub>3</sub>  
298 K

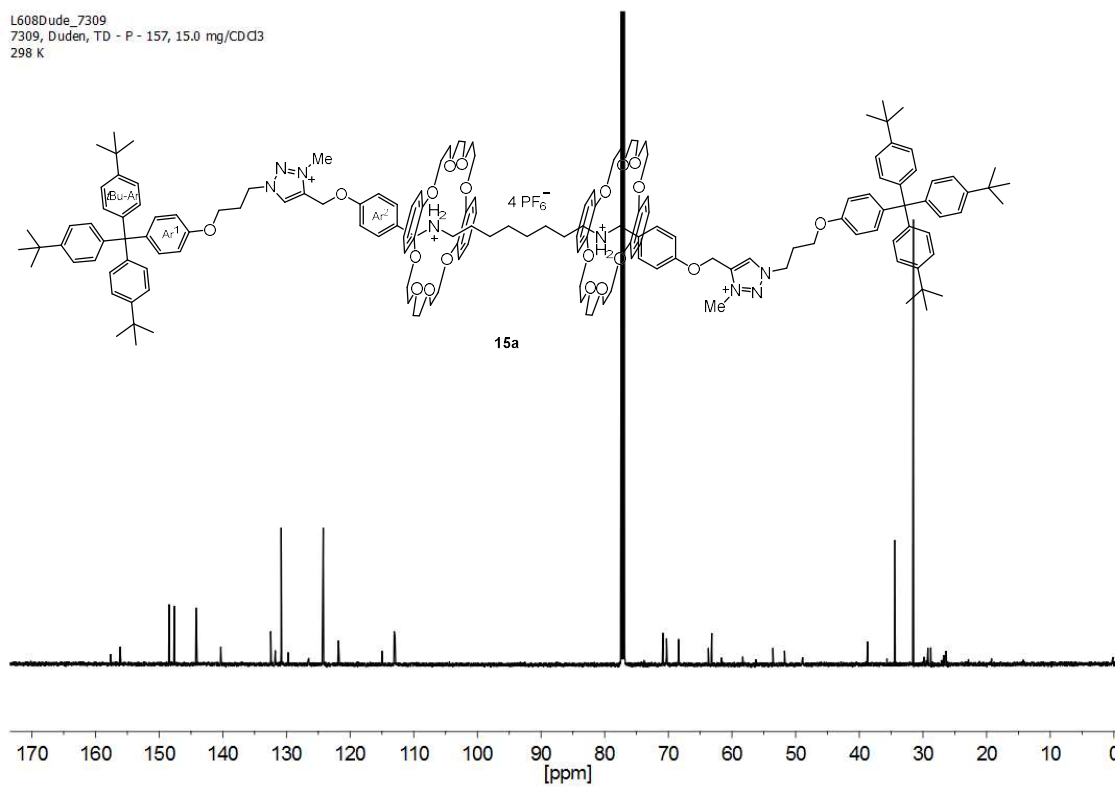

**[3]-*N,N'*-(Decane-1,10-diyl)-*N,N'*-bis{[4-({1-[3-(4-{tris[4-(dimethylethyl)phenyl]methyl}phenoxy)propyl]-1*H*-1,2,3-triazol-4-yl]methoxy}phenyl]methanaminium}-rotaxa-bis(1,12-[1,2]dibenzena-2,5,8,11,13,16,19,22-octaoadoccosaphan) bis(hexafluorophosphate) • dibenzo-24-crown-8 (**14b**•**13**)**

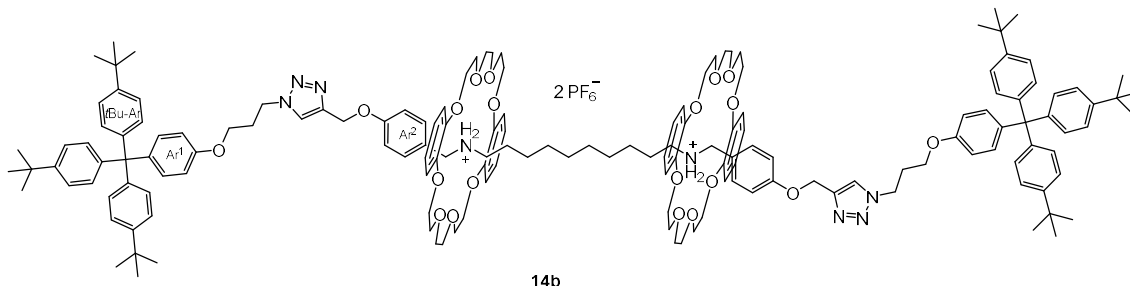

Under nitrogen atmosphere, axis **3b** (96.2 mg, 128  $\mu$ mol) and DB24C8 (**13**, 144 mg, 321  $\mu$ mol) were suspended in dry dichloromethane (50 mL). The suspension was stirred at room temp. until a clear solution was obtained. Then stopper **11** [4] (150 mg, 255  $\mu$ mol), tetrakis(acetonitrile)copper(I) hexafluorophosphate (95.1 mg, 255  $\mu$ mol) and 2,6-dimethylpyridine (ca. 60  $\mu$ L) were added. The yellow solution was stirred for 1 d at room temp. and then water (20 mL) was added. The aqueous layer was extracted with dichloromethane (3 x 30 mL) and the solvent was removed in vacuo. The residue was filtered through silica gel [dichloromethane/methanol (80 : 20)]. The solvent of the filtrate was removed in vacuo and the residue was purified by chromatography using silica gel [dichloromethane/methanol (1 : 0)  $\rightarrow$  (24 : 1),  $R_f$  = 0.05]. The yellow solid was dissolved in very little ethyl acetate and DB24C8 (**13**) precipitated. The solid was filtered off and the process was repeated. Finally, the residue was cleaned again by chromatography on silica gel [dichloromethane/methanol (1 : 0)  $\rightarrow$  (24 : 1),  $R_f$  = 0.05]. A pale yellow solid was obtained which consisted of rotaxane **14b** and one additional equivalent of macrocycle **13**. The analytical data below have been obtained from this adduct **14b**•**13**.

**Yield:** 160 mg (48,9  $\mu$ mol, 38 %).

**Melting point:** 175  $^{\circ}$ C.

**$^1\text{H-NMR}$**  (500 MHz,  $\text{CDCl}_3$ ):  $\delta$  = 7.86 (br. s, 2 H,  $H_{\text{Tri}}$ ), 7.37 (d,  $^3J$  = 8.4 Hz, 4 H,  $\text{Ar}^2\text{-H-2,6}$ ), 7.24-7.20 (m, 12 H,  $t\text{BuAr-H-3,5}$ ), 7.12-7.04 (m, 24 H,  $t\text{BuAr-H-2,6}$ ,  $\text{Ar}^1\text{-H-2,6}$ ,  $\text{Ar}_{\text{crown-H-3,4,5,6}}$ ), 6.90-6.83 (m, 20 H,  $\text{Ar}^2\text{-H-3,5}$ ,  $\text{Ar}_{\text{crown-H-3,4,5,6}}$ ), 6.74 (d,  $^3J$  = 8.9 Hz, 4 H,  $\text{Ar}^1\text{-H-3,5}$ ), 5.12 (br. s, 4 H,  $\text{Ar}^2\text{O-CH}_2$ ), 4.60 (t,  $^3J$  = 6.8 Hz, 4 H,  $\text{Tri-CH}_2\text{CH}_2$ ), 4.56-4.52 (m, 4 H,  $\text{Ar}^2\text{-CH}_2$ ), 4.33-4.25 (m, 8 H,  $\text{CH}_2\text{-crown}$ ), 4.25-4.17 (m, 8 H,  $\text{CH}_2\text{-crown}$ ), 4.12-4.05 (m, 8 H,  $\text{CH}_2\text{-crown}$ ), 3.99 (t,  $^3J$  = 5.2 Hz, 4 H,  $\text{Ar}^1\text{-OCH}_2$ ), 3.84-3.75 (m, 24 H,  $\text{CH}_2\text{-crown}$ ), 3.65-3.56 (m, 16 H,  $\text{CH}_2\text{-crown}$ ), 3.43-3.35 (m, 8 H,  $\text{CH}_2\text{-crown}$ ), 3.01-2.94 (m, 4 H,  $\text{NH}_2\text{CH}_2\text{CH}_2$ ), 2.42-2.36 (m, 4 H,  $\text{Tri-CH}_2\text{CH}_2$ ), 1.39-1.32 (m, 4 H,  $\text{NH}_2\text{CH}_2\text{CH}_2$ ), 1.29 (s, 54 H,  $\text{CH}_3$ ), 0.96-0.86 (m, 12 H,  $\text{NH}_2\text{CH}_2\text{CH}_2\text{CH}_2\text{CH}_2\text{CH}_2$ ) ppm.

**$^{13}\text{C-NMR}$**  (125 MHz,  $\text{CDCl}_3$ ):  $\delta$  = 158.5 (s,  $\text{Ar}^2\text{-C-1}$ ), 156.4 (s,  $\text{Ar}^1\text{-C-1}$ ), 148.4 (s,  $t\text{BuAr-C-4}$ ), 147.6 (s,  $\text{Ar}_{\text{crown-C-1,2}}$ ), 144.2 (s,  $t\text{BuAr-C-1}$ ), 140.1 (s,  $\text{Ar}^1\text{-C-4}$ ), 132.4 (d,  $t\text{BuAr-C-2,6}$ ), 131.6 (d,  $\text{Ar}^2\text{-C-3,5}$ ), 130.8 (d,  $\text{Ar}^1\text{-C-3,5}$ ), 125.3 (s,  $\text{Ar}^2\text{-C-4}$ ), 124.2 (d,  $t\text{BuAr-C-3,5}$ ), 121.9 (d,  $\text{Ar}_{\text{crown-C-4,5}}$ ), 114.7 (d,  $\text{Ar}^2\text{-C-2,6}$ ), 113.1 (d,  $\text{Ar}^1\text{-C-2,6}$ ), 113.0 (d,  $\text{Ar}_{\text{crown-C-3,6}}$ ), 70.8 (t,  $\text{CH}_2\text{-crown}$ ), 70.3 (t,  $\text{CH}_2\text{-crown}$ ), 68.4 (t,  $\text{CH}_2\text{-crown}$ ), 64.1 (t,  $\text{Ar}^1\text{-OCH}_2$ ), 63.2 (s,  $\text{C}(t\text{BuAr})_3\text{Ar}^1$ ), 61.7 (t,  $\text{Ar}^2\text{-OCH}_2$ ),

51.6 (t, Ar<sup>2</sup>-CH<sub>2</sub>), 48.8 (t, NH<sub>2</sub>CH<sub>2</sub>CH<sub>2</sub>), 47.4 (t, Tri-CH<sub>2</sub>CH<sub>2</sub>), 34.4 (s, CCH<sub>3</sub>), 31.5 (q, CH<sub>3</sub>), 29.9 (t, Ar<sup>1</sup>-OCH<sub>2</sub>CH<sub>2</sub>), 28.8 (t, NH<sub>2</sub>CH<sub>2</sub>CH<sub>2</sub>CH<sub>2</sub>CH<sub>2</sub>CH<sub>2</sub>), 26.4 (t, NH<sub>2</sub>CH<sub>2</sub>CH<sub>2</sub>CH<sub>2</sub>), 26.3 (t, NH<sub>2</sub>CH<sub>2</sub>CH<sub>2</sub>) ppm.

The signals Tri-C-4, 5 could not be found.

In addition, signals of an additional ring were observed. Intergration estimated approx. one equivalent.

**IR** (ATR):  $\tilde{\nu}$  = 2960 (w, aliph. CH), 2873 (w, NH<sub>2</sub><sup>+</sup>), 1501, 1451 (m, arom.), 1249, 1121, 1053 (m, CO), 834 (s, 1,4-disubst.), 743 (m, 1,2-disubst.), 556 (s, PF<sub>6</sub>) cm<sup>-1</sup>.

**MS** (HR-ESI): C<sub>158</sub>H<sub>204</sub>N<sub>8</sub>O<sub>20</sub> calcd.  $m/z$  = 1266.7591, found  $m/z$  = 1266.7589 ( $\Delta$  = -0.08 ppm).

20180213-10-L502Duden\_6283

Position 10, Mitarbeiter Duden, Sample TD - P - 202 F 2 Fil F 2, Menge 18.0 mg/CDCl<sub>3</sub>, Re kein

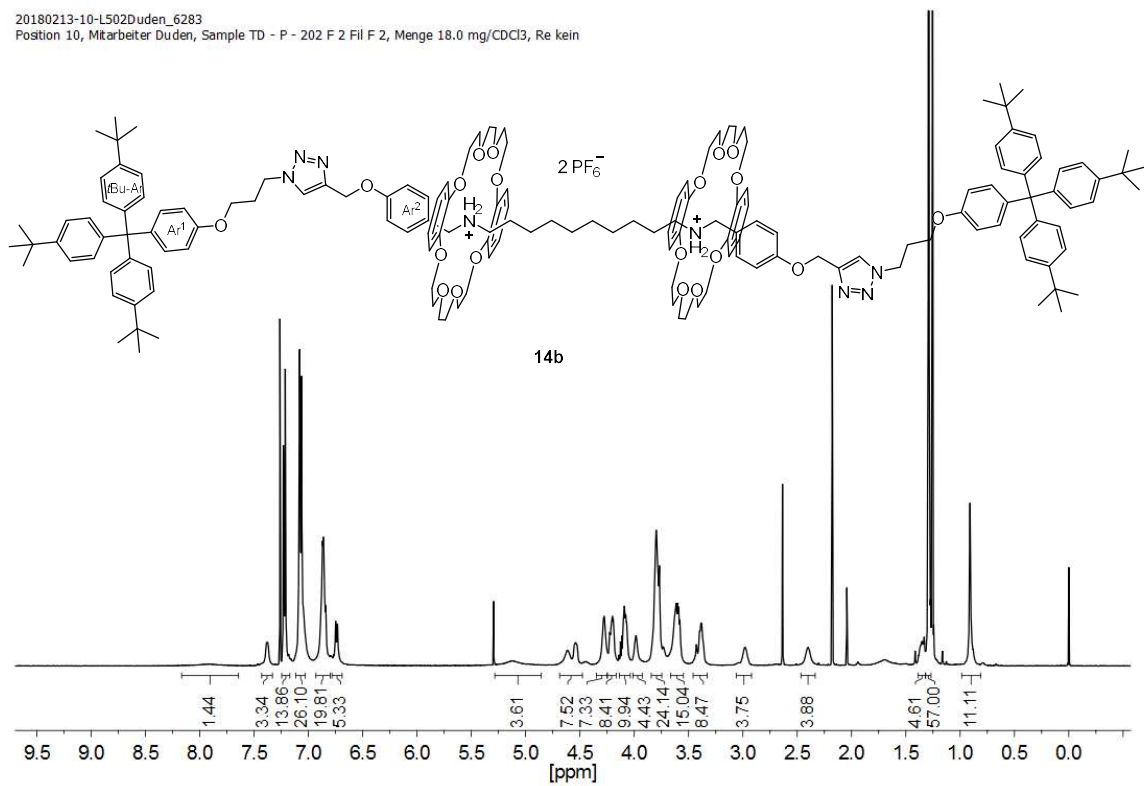

20180213-10-L502Duden\_6283

Position 10, Mitarbeiter Duden, Sample TD - P - 202 F 2 Fil F 2, Menge 18.0 mg/CDCl<sub>3</sub>, Re kein

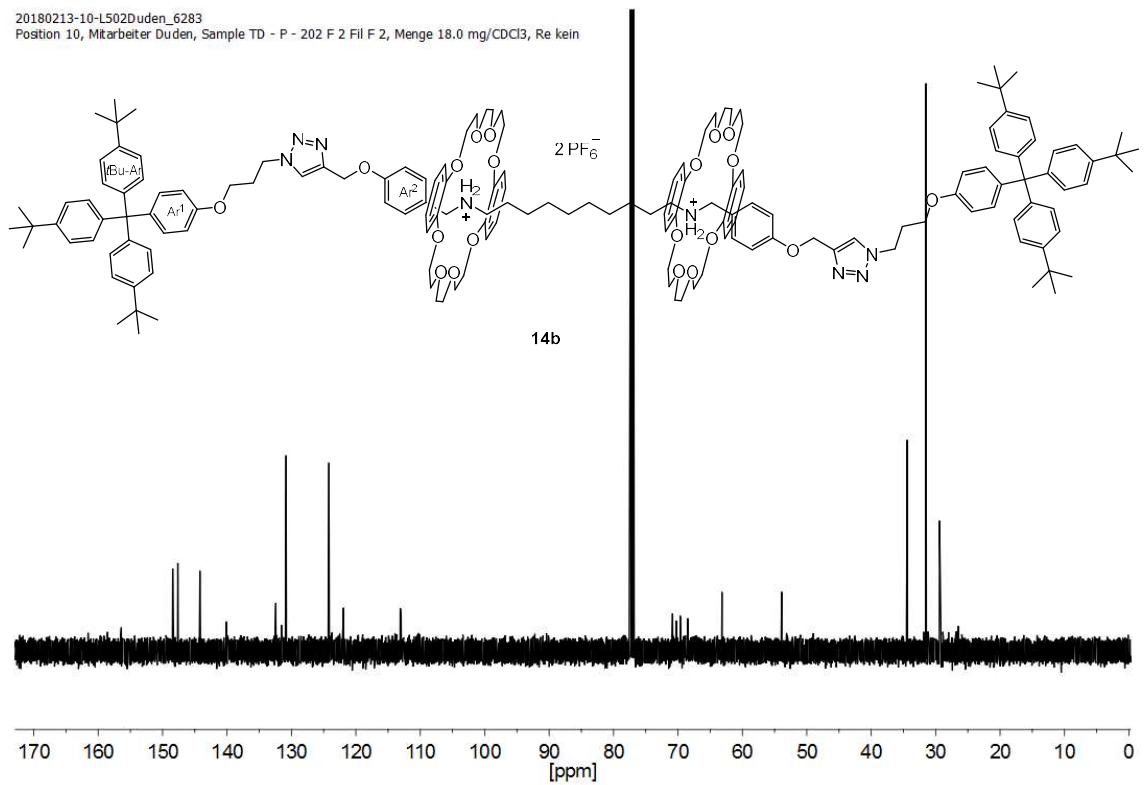

**[3]-4,4'-[Decane-1,10-diylbis(azaniumdiylmethylene-4,1-phenylenoxymethylene)]-bis{3-methyl-1-[3-(4-{tris[4-(dimethylethyl)phenyl]methyl}phenoxy)propyl]-1*H*-1,2,3-triazol-3-ium}-rotaxa-bis(1,12-[1,2]dibenzena-2,5,8,11,13,16,19,22-octaoxadocosaphan) tetrakis(hexafluorophosphate) • dibenzo-24-crown-8 (**15b•13**)**

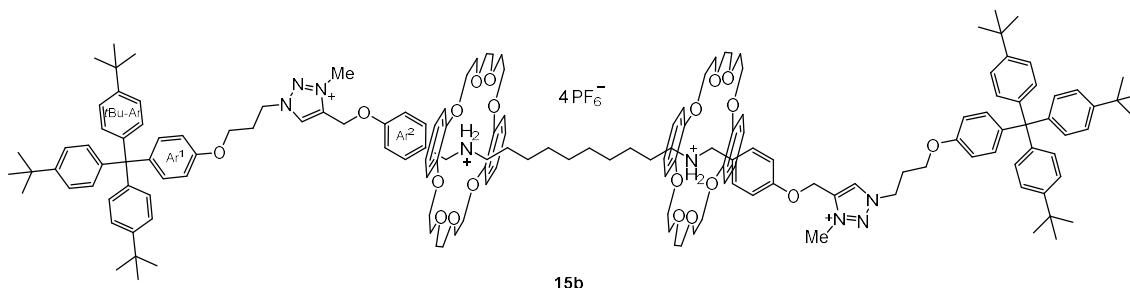

Rotaxane **14b•13** (50.0 mg, 15.3  $\mu$ mol) was dissolved in methyl iodide (2 mL) and stirred for 4 d at room temp. The solvent was removed in vacuo and the residue was dissolved in dichloromethane (3 mL). An identical volume of saturated aqueous ammonium hexafluorophosphate solution was added and the mixture was stirred vigorously for 3 h at room temp. The aqueous layer was extracted with dichloromethane (2 x 10 mL). The organic layer was dried with sodium sulfate, filtered and the solvent was removed in vacuo. A pale yellow solid was obtained which consisted of rotaxane **15b** and one additional equivalent of macrocycle **13**. The analytical data below have been obtained from this adduct **15b•13**.

**Yield:** 54.0 mg (15.0  $\mu$ mol, 98 %).

**Melting point:** 204 °C.

**<sup>1</sup>H-NMR** (500 MHz, CDCl<sub>3</sub>):  $\delta$  = 8.51 (s, 2 H, *H*<sub>Tri</sub>), 7.40 (d, <sup>3</sup>*J* = 8.6 Hz, 4 H, Ar<sup>2</sup>-*H*-2,6), 7.21 (d, <sup>3</sup>*J* = 8.7 Hz, 12 H, *t*BuAr-*H*-3,5), 7.10-7.04 (m, 26 H, *t*BuAr-*H*-2,6, Ar<sup>1</sup>-*H*-2,6, Ar<sub>crown</sub>-*H*-3,4,5,6), 6.90-6.79 (m, 20 H, Ar<sup>2</sup>-*H*-3,5, Ar<sub>crown</sub>-*H*-3,4,5,6), 6.70 (d, <sup>3</sup>*J* = 8.7 Hz, 4 H, Ar<sup>1</sup>-*H*-3,5), 5.25 (s, 4 H, Ar<sup>2</sup>O-CH<sub>2</sub>), 4.77 (t, <sup>3</sup>*J* = 7.1 Hz, 4 H, Tri-CH<sub>2</sub>CH<sub>2</sub>), 4.54 (br. s, 4 H, Ar<sup>2</sup>-CH<sub>2</sub>), 4.26 (s, 6 H, CH<sub>3</sub>Tri), 4.19-4.12 (m, 8 H, CH<sub>2</sub>-crown), 4.11-3.98 (m, 16 H, CH<sub>2</sub>-crown, Ar<sup>1</sup>OCH<sub>2</sub>), 3.86-3.74 (m, 24 H, CH<sub>2</sub>-crown), 3.60-3.53 (m, 8 H, CH<sub>2</sub>-crown), 3.44-3.36 (m, 8 H, CH<sub>2</sub>-crown), 3.00-2.91 (m, 4 H, NH<sub>2</sub>CH<sub>2</sub>CH<sub>2</sub>), 2.52-2.43 (m, 4 H, Tri-CH<sub>2</sub>CH<sub>2</sub>), 1.39-1.33 (m, 4 H, NH<sub>2</sub>CH<sub>2</sub>CH<sub>2</sub>), 1.28 (m, 54 H, C(CH<sub>3</sub>)<sub>3</sub>), 0.95-0.89 (m, 12 H, NH<sub>2</sub>CH<sub>2</sub>CH<sub>2</sub>CH<sub>2</sub>CH<sub>2</sub>CH<sub>2</sub>) ppm.

**<sup>13</sup>C-NMR** (125 MHz, CDCl<sub>3</sub>):  $\delta$  = 157.5 (s, Ar<sup>2</sup>-C-1), 156.0 (s, Ar<sup>1</sup>-C-1), 148.4 (s, *t*BuAr-C-4), 147.6 (s, Ar<sub>crown</sub>-C-1,2), 144.2 (s, *t*BuAr-C-1), 140.2 (s, Tri-C-4), 140.0 (s, Ar<sup>1</sup>-C-4), 132.5 (d, *t*BuAr-C-2,6), 131.8 (d, Ar<sup>2</sup>-C-3,5), 130.8 (d, Ar<sup>1</sup>-C-3,5), 129.5 (d, Tri-C-5), 126.3 (s, Ar<sup>2</sup>-C-4), 124.2 (d, *t*BuAr-C-3,5), 121.9 (d, Ar<sub>crown</sub>-C-4,5), 114.9 (d, Ar<sup>2</sup>-C-2,6), 113.1 (d, Ar<sup>1</sup>-C-2,6), 112.8 (d, Ar<sub>crown</sub>-C-3,6), 70.8 (t, CH<sub>2</sub>-crown), 70.3 (t, CH<sub>2</sub>-crown), 68.4 (t, CH<sub>2</sub>-crown), 63.5 (t, Ar<sup>1</sup>-OCH<sub>2</sub>), 63.2 (s, C(*t*BuAr)<sub>3</sub>Ar<sup>1</sup>), 58.2 (t, Ar<sup>2</sup>-OCH<sub>2</sub>), 51.7 (t, Ar<sup>2</sup>-CH<sub>2</sub>, t, Tri-CH<sub>2</sub>CH<sub>2</sub>), 48.8 (t, NH<sub>2</sub>CH<sub>2</sub>CH<sub>2</sub>), 38.4 (q, CH<sub>3</sub>Tri), 34.4 (s, C(CH<sub>3</sub>)<sub>3</sub>), 31.5 (q, C(CH<sub>3</sub>)<sub>3</sub>), 29.4 (t, Ar<sup>1</sup>-OCH<sub>2</sub>CH<sub>2</sub>), 28.8 (t, NH<sub>2</sub>CH<sub>2</sub>CH<sub>2</sub>CH<sub>2</sub>), 26.6 (t, NH<sub>2</sub>CH<sub>2</sub>CH<sub>2</sub>), 26.3 (t, NH<sub>2</sub>CH<sub>2</sub>CH<sub>2</sub>CH<sub>2</sub>CH<sub>2</sub>, t, NH<sub>2</sub>CH<sub>2</sub>CH<sub>2</sub>CH<sub>2</sub>CH<sub>2</sub>CH<sub>2</sub>) ppm.

In addition, signals of an additional ring were observed. Intergration estimated approx. one equivalent.

**IR** (ATR):  $\tilde{\nu}$  = 2950 (w, aliph. CH), 1504, 1455 (m, arom.), 1247, 1106, 1055 (m, CO), 837 (s, 1,4-disubst.), 742 (m, 1,2-disubstit.), 557 (s, PF<sub>6</sub>) cm<sup>-1</sup>.

**MS (HR-ESI):**  $C_{160}H_{210}N_8O_{20}$  calcd.  $m/z = 640.8910$ , found  $m/z = 640.8900$  ( $\Delta = -1.52$  ppm),  
 $C_{160}H_{210}F_6N_8O_{20}P$  calcd.  $m/z = 902.8429$ , found  $m/z = 902.8410$  ( $\Delta = -2.10$  ppm),  
 $C_{160}H_{210}F_{12}N_8O_{20}P_2$  calcd.  $m/z = 1426.7467$ , found  $m/z = 1426.7446$  ( $\Delta = -1.47$  ppm).

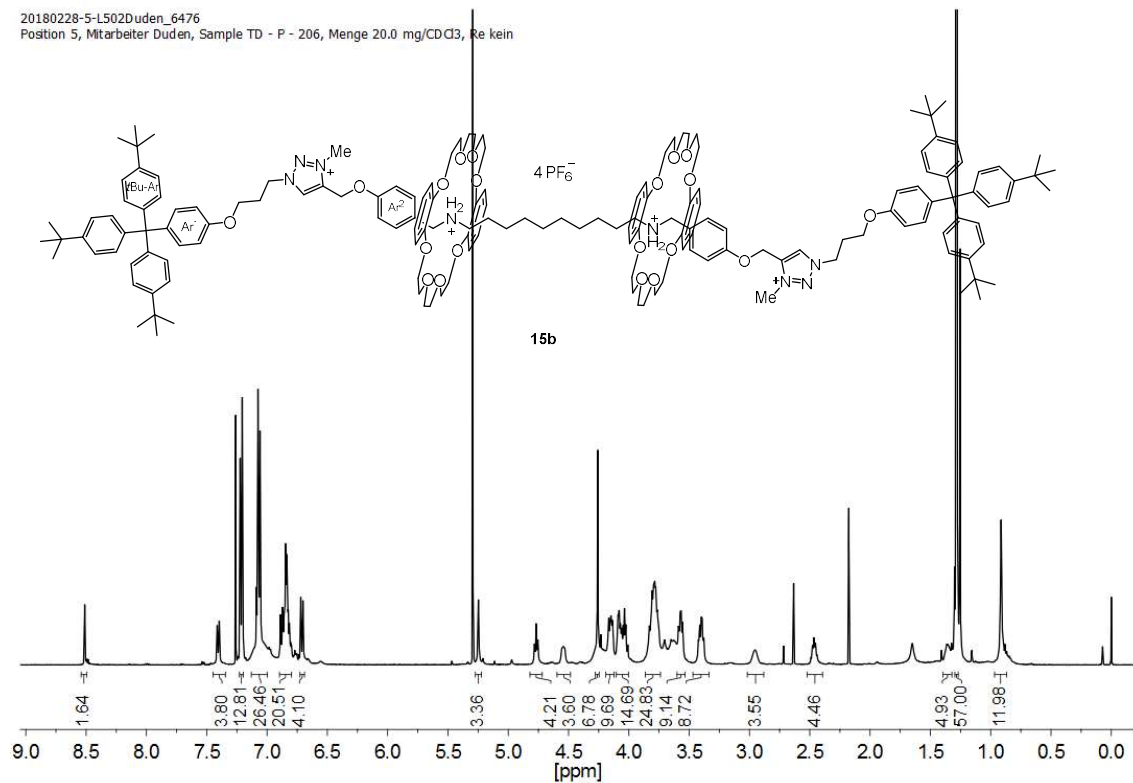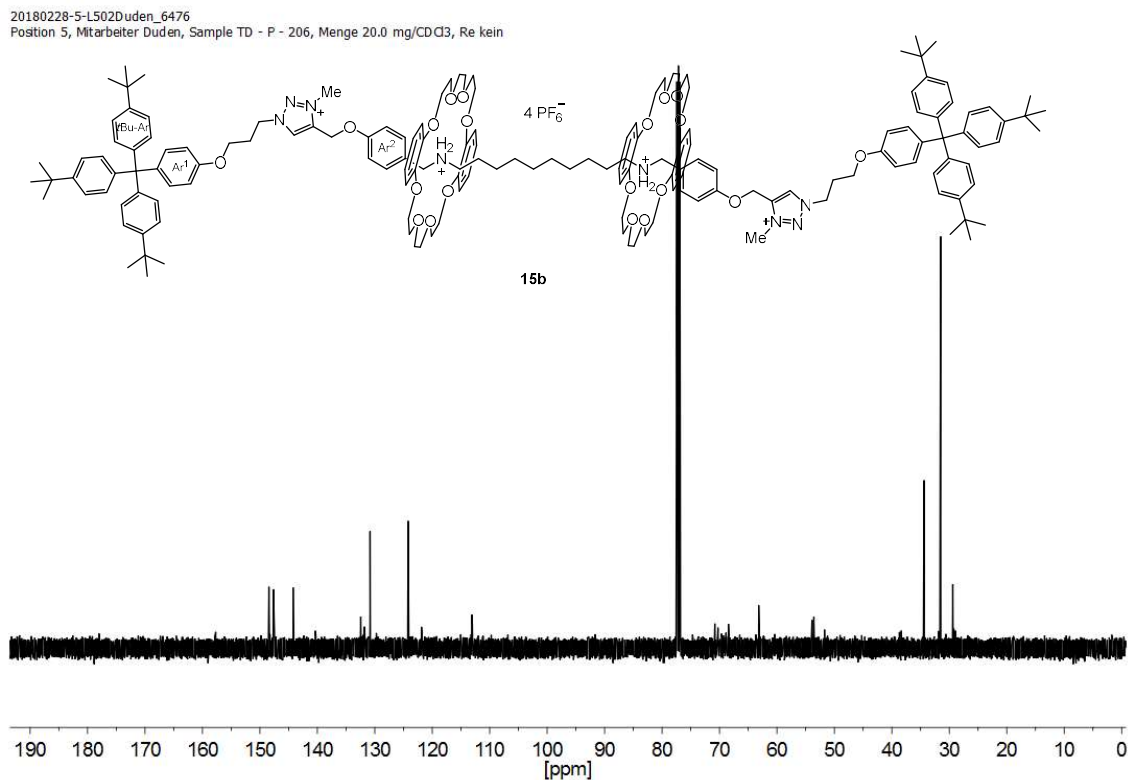

**[3]-*N,N'*-[Butane-1,4-diylbis(oxy-4,1-phenylenemethylene)]-*N,N'*-bis{[4-({1-[3-(4-{tris[4-(dimethylethyl)phenyl]methyl}phenoxy)propyl]-1*H*-1,2,3-triazol-4-yl)methoxy}phenyl]methanaminium}-rotaxa-bis(1,12-[1,2]dibenzena-2,5,8,11,13,16,19,22-octaoadococaphan) bis(hexafluorophosphate) • dibenzo-24-crown-8 (16•13)**

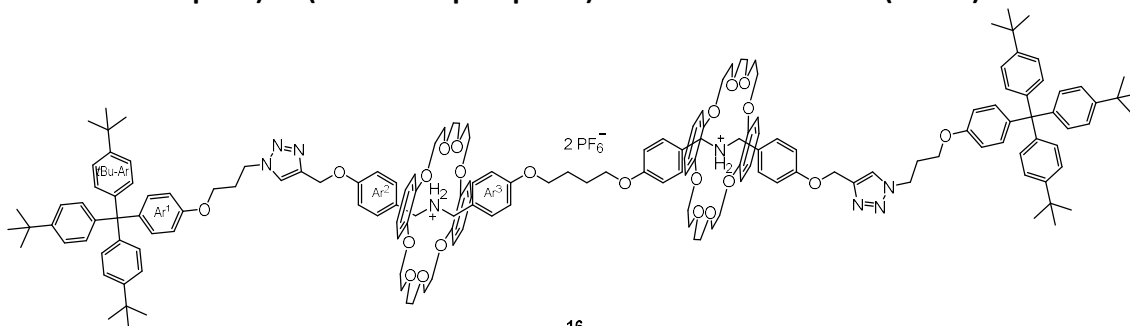

16

Under nitrogen atmosphere, Axis **7** (100 mg, 114  $\mu\text{mol}$ ) and DB24C8 (**13**, 102 mg, 227  $\mu\text{mol}$ ) were suspended in dry dichloromethane (50 mL). The suspension was stirred at room temp. until a clear solution was obtained. Then stopper **11** [4] (146 mg, 250  $\mu\text{mol}$ ), tetrakis(acetonitrile)copper(I) hexafluorophosphate (93.0 mg, 250  $\mu\text{mol}$ ) and 2,6-dimethylpyridine (ca. 60  $\mu\text{L}$ ) were added. The yellow solution was stirred for 1 d at room temp. and then water (20 mL) was added. The aqueous layer was extracted with dichloromethane (3 x 30 mL) and the solvent was removed in vacuo. The residue was filtered through silica gel [dichloromethane/methanol (80 : 20)]. The solvent of the filtrate was removed in vacuo and the residue was purified by chromatography using silica gel [dichloromethane/methanol (1 : 0)  $\rightarrow$  (24 : 1),  $R_f = 0.05$ ]. The yellow solid was dissolved in very little ethyl acetate and DB24C8 (**13**) precipitated. The solid was filtered off and the process was repeated. Finally, the residue was purified again by chromatography on silica gel [dichloromethane/methanol (1 : 0)  $\rightarrow$  (24 : 1),  $R_f = 0.05$ ]. A pale yellow solid was obtained which consisted of rotaxane **16** and one additional equivalent of macrocycle **13**. The analytical data below have been obtained from this adduct **16•13**.

**Yield:** 22.0 mg (6.47  $\mu\text{mol}$ , 6 %).

**Melting point:** 178  $^{\circ}\text{C}$ .

**$^1\text{H-NMR}$**  (500 MHz,  $\text{CDCl}_3$ ):  $\delta$  = 7.84 (br. s, 2 H,  $H_{\text{Tri}}$ ), 7.46-7.40 (m, 4 H,  $\text{Ar}^2\text{-H-2,6}$ ), 7.24-7.17 (m, 16 H,  $t\text{BuAr-H-3,5}$ ,  $\text{Ar}^3\text{-H-2,6}$ ), 7.10-7.04 (m, 20 H,  $t\text{BuAr-H-2,6}$ ,  $\text{Ar}^1\text{-H-2,6}$ ,  $\text{Ar}_{\text{crown-H-3,4,5,6}}$ ), 6.98-6.72 (m, 28 H,  $\text{Ar}^2\text{-H-3,5}$ ,  $\text{Ar}^3\text{-H-3,5}$ ,  $\text{Ar}^1\text{-H-3,5}$ ,  $\text{Ar}_{\text{crown-H-3,4,5,6}}$ ), 5.11 (br. s, 4 H,  $\text{Ar}^2\text{O-CH}_2$ ), 4.58 (t,  $^3J = 7.5$  Hz, 4 H,  $\text{Tri-CH}_2\text{CH}_2$ ), 4.48-4.42 (m, 8 H,  $\text{Ar}^2\text{-CH}_2$ ,  $\text{Ar}^3\text{-CH}_2$ ), 4.13-4.06 (m, 16 H,  $\text{CH}_2\text{-crown}$ ), 4.02-3.96 (m, 8 H,  $\text{Ar}^1\text{-OCH}_2$ ,  $\text{Ar}^3\text{-OCH}_2$ ), 3.76-3.69 (m, 16 H,  $\text{CH}_2\text{-crown}$ ), 3.47-3.36 (m, 16 H,  $\text{CH}_2\text{-crown}$ ), 3.84-3.75 (m, 24 H,  $\text{CH}_2\text{-crown}$ ), 3.43-3.35 (m, 8 H,  $\text{CH}_2\text{-crown}$ ), 2.41-2.34 (m, 4 H,  $\text{Tri-CH}_2\text{CH}_2$ ), 1.96-1.92 (m, 4 H,  $\text{Ar}^3\text{-OCH}_2\text{CH}_2$ ), 1.29 (s, 54 H,  $\text{CH}_3$ ) ppm.

**$^{13}\text{C-NMR}$**  (125 MHz,  $\text{CDCl}_3$ ):  $\delta$  = 159.7 (s,  $\text{Ar}^3\text{-C-1}$ ), 158.7 (s,  $\text{Ar}^2\text{-C-1}$ ), 156.4 (s,  $\text{Ar}^1\text{-C-1}$ ), 148.4 (s,  $t\text{BuAr-C-4}$ ), 147.6 (s,  $\text{Ar}_{\text{crown-C-1,2}}$ ), 144.2 (s,  $t\text{BuAr-C-1}$ ), 140.1 (s,  $\text{Ar}^1\text{-C-4}$ ), 132.4 (d,  $t\text{BuAr-C-2,6}$ ), 130.94 (d,  $\text{Ar}^2\text{-C-3,5}$ ), 130.90 (d,  $\text{Ar}^3\text{-C-3,5}$ ), 130.8 (d,  $\text{Ar}^1\text{-C-3,5}$ ), 124.3 (s,  $\text{Ar}^2\text{-C-4}$ ), 124.2 (d,  $t\text{BuAr-C-3,5}$ ), 123.6 (s,  $\text{Ar}^3\text{-C-4}$ ), 121.8 (d,  $\text{Ar}_{\text{crown-C-4,5}}$ ), 115.0 (d,  $\text{Ar}^3\text{-C-2,6}$ ), 114.7 (d,  $\text{Ar}^2\text{-C-2,6}$ ), 113.1 (d,  $\text{Ar}^1\text{-C-2,6}$ ), 112.9 (d,  $\text{Ar}_{\text{crown-C-3,6}}$ ), 70.8 (t,  $\text{CH}_2\text{-crown}$ ), 70.3 (t,  $\text{CH}_2\text{-crown}$ ),

68.4 (t, CH<sub>2</sub>-crown), 67.2 (t, Ar<sup>3</sup>-OCH<sub>2</sub>), 64.1 (t, Ar<sup>1</sup>-OCH<sub>2</sub>), 63.2 (s, C(tBuAr)<sub>3</sub>Ar<sup>1</sup>), 61.5 (t, Ar<sup>2</sup>-OCH<sub>2</sub>), 51.9 (t, Ar<sup>2</sup>-CH<sub>2</sub>, Ar<sup>3</sup>-CH<sub>2</sub>), 47.4 (t, Tri-CH<sub>2</sub>CH<sub>2</sub>), 34.4 (s, CCH<sub>3</sub>), 31.5 (q, CH<sub>3</sub>), 30.2 (t, Ar<sup>1</sup>-OCH<sub>2</sub>CH<sub>2</sub>), 25.7 (t, Ar<sup>3</sup>-OCH<sub>2</sub>CH<sub>2</sub>) ppm.

The signals for Tri-C-4,5 and Ar<sup>2</sup>-C-1,4 could not be found.

In addition, signals of an additional ring were observed. Intergration estimated approx. one equivalent.

**IR** (ATR):  $\tilde{\nu}$  = 2963 (w, aliph. CH), 2879 (w, NH<sub>2</sub><sup>+</sup>), 1501, 1453 (m, arom.), 1252, 1124, 1050 (m, CO), 834 (s, 1,4-disubst.), 743 (m, 1,2-disubst.), 556 (s, PF<sub>6</sub>) cm<sup>-1</sup>.

**MS** (HR-ESI): C<sub>166</sub>H<sub>204</sub>N<sub>8</sub>O<sub>22</sub> calcd.  $m/z$  = 1330.7540, found  $m/z$  = 1330.7541 ( $\Delta$  = -0.01 ppm).



20180213-11-L502Duden\_6284  
 Position 11, Mitarbeiter Duden, Sample TD - P - 203 F 2 Fil F 1, Menge 15.0 mg/CDCl<sub>3</sub>, Re kein

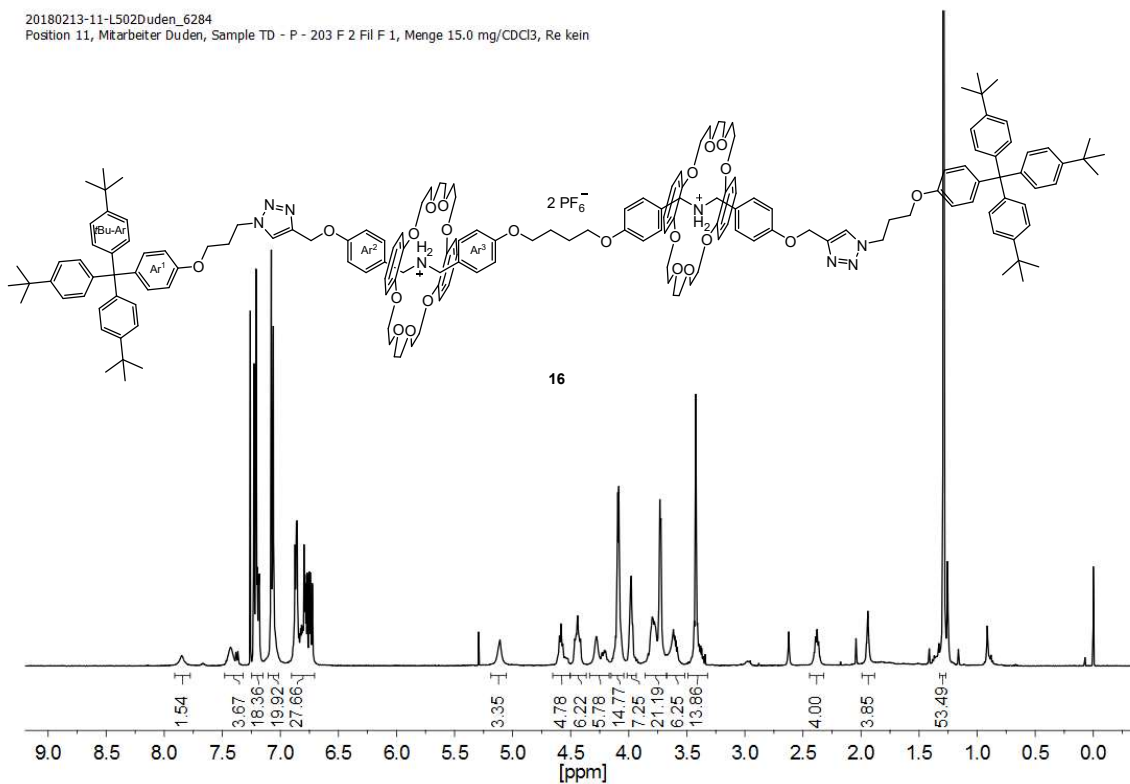

20180213-11-L502Duden\_6284  
 Position 11, Mitarbeiter Duden, Sample TD - P - 203 F 2 Fil F 1, Menge 15.0 mg/CDCl<sub>3</sub>, Re kein

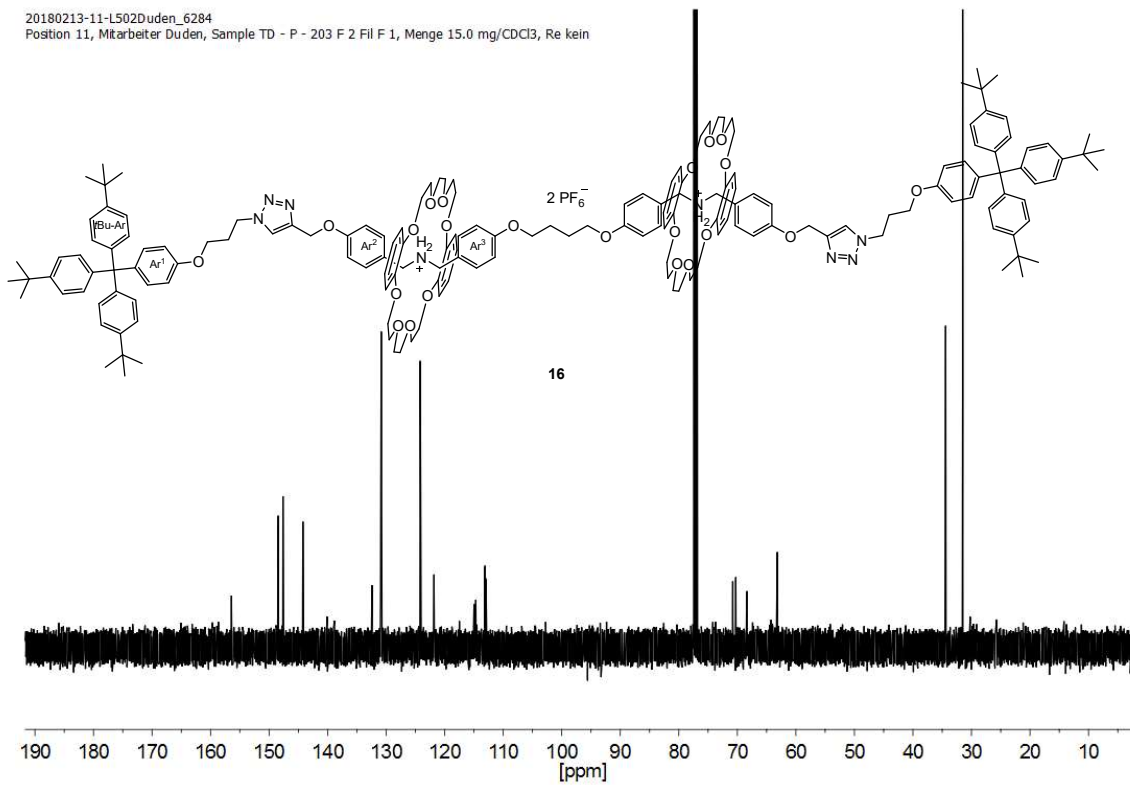

**[3]-4,4'-[Butane-1,4-diylbis(oxy-4,1-phenylenemethyleneazaniumdiylmethylene-4,1-phenyleneoxymethylene)]-bis{3-methyl-1-[3-(4-{tris[4-(dimethylethyl)phenyl]methyl}phenoxy)propyl]-1*H*-1,2,3-triazol-3-ium}-rotaxabis(1,12-[1,2]dibenzena-2,5,8,11,13,16,19,22-octaodocosa-phan) tetrakis(hexafluorophosphate) • dibenzo-24-crown-8 (**17•13**)**

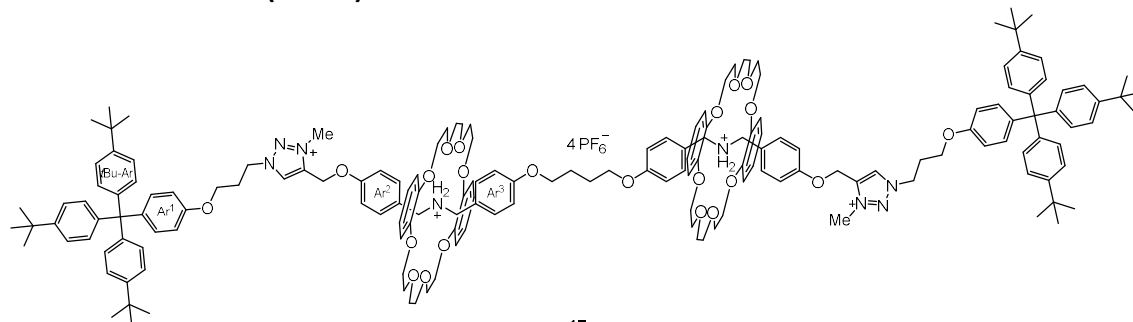

17

Rotaxane **16•13** (33.0 mg, 9.70  $\mu\text{mol}$ ) was dissolved in methyl iodide (2 mL) and stirred for 4 d at room temp. The solvent was removed in vacuo and the residue was dissolved in dichloromethane (3 mL). An identical volume of saturated aqueous ammonium hexafluorophosphate solution was added and the mixture was stirred vigorously for 3 h at room temp. The aqueous layer was extracted with dichloromethane (2 x 10 mL). The organic layer was dried with sodium sulfate, filtered and the solvent was removed in vacuo. A pale yellow solid was obtained which consisted of rotaxane **17** and one additional equivalent of macrocycle **13**. The analytical data below have been obtained from this adduct **17•13**.

**Yield:** 36.0 mg (9.67  $\mu\text{mol}$ , quant.).

**Melting point:** 140 °C.

**$^1\text{H-NMR}$**  (500 MHz,  $\text{CDCl}_3$ ):  $\delta$  = 8.49 (br. s, 2 H,  $H_{\text{Tri}}$ ), 7.48-7.39 (m, 4 H,  $\text{Ar}^2\text{-H-2,6}$ ), 7.24-7.16 (m, 16 H,  $t\text{BuAr-H-3,5}$ ,  $\text{Ar}^3\text{-H-2,6}$ ), 7.19-7.04 (m, 24 H,  $t\text{BuAr-H-2,6}$ ,  $\text{Ar}^1\text{-H-2,6}$ ,  $\text{Ar}_{\text{crown-H-3,4,5,6}}$ ), 6.98-6.74 (m, 28 H,  $\text{Ar}^2\text{-H-3,5}$ ,  $\text{Ar}^3\text{-H-3,5}$ ,  $\text{Ar}_{\text{crown-H-3,4,5,6}}$ ), 6.71-6.68 (m, 4 H,  $\text{Ar}^1\text{-H-3,5}$ ), 5.21 (s, 4 H,  $\text{Ar}^2\text{-O-CH}_2$ ), 4.75 (t,  $^3J$  = 7.0 Hz, 4 H,  $\text{Tri-CH}_2\text{CH}_2$ ), 4.49-4.47 (m, 8 H,  $\text{Ar}^2\text{-CH}_2$ ,  $\text{Ar}^3\text{-CH}_2$ ), 4.23 (s, 6 H,  $\text{CH}_{3\text{Tri}}$ ), 4.11-3.96 (m, 24 H,  $\text{CH}_2\text{-crown}$ ,  $\text{Ar}^1\text{-OCH}_2$ ,  $\text{Ar}^3\text{-OCH}_2$ ), 3.84-3.54 (m, 32 H,  $\text{CH}_2\text{-crown}$ ), 3.45-3.38 (m, 16 H,  $\text{CH}_2\text{-crown}$ ), 2.38-2.34 (m, 4 H,  $\text{Tri-CH}_2\text{CH}_2$ ), 1.96-1.92 (m, 4 H,  $\text{Ar}^3\text{-OCH}_2\text{CH}_2$ ), 1.29 (s, 54 H,  $\text{CH}_3$ ) ppm.

**$^{13}\text{C-NMR}$**  (125 MHz,  $\text{CDCl}_3$ ):  $\delta$  = 159.5 (s,  $\text{Ar}^3\text{-C-1}$ ), 157.4 (s,  $\text{Ar}^2\text{-C-1}$ ), 156.0 (s,  $\text{Ar}^1\text{-C-1}$ ), 148.4 (s,  $t\text{BuAr-C-4}$ ), 147.6 (s,  $\text{Ar}_{\text{crown-C-1,2}}$ ), 144.2 (s,  $t\text{BuAr-C-1}$ ), 140.04 (s,  $\text{Tri-C-4}$ ), 140.03 (s,  $\text{Ar}^1\text{-C-4}$ ), 132.3 (d,  $t\text{BuAr-C-2,6}$ ), 131.7 (d,  $\text{Ar}^2\text{-C-3,5}$ ), 131.1 (d,  $\text{Ar}^3\text{-C-3,5}$ ), 130.8 (d,  $\text{Ar}^1\text{-C-3,5}$ ), 129.5 (d,  $\text{Tri-C-5}$ ), 125.5 (s,  $\text{Ar}^2\text{-C-4}$ ), 124.2 (d,  $t\text{BuAr-C-3,5}$ ), 123.5 (s,  $\text{Ar}^3\text{-C-4}$ ), 121.8 (d,  $\text{Ar}_{\text{crown-C-4,5}}$ ), 114.8 (d,  $\text{Ar}^2\text{-C-2,6}$ ), 114.5 (d,  $\text{Ar}^3\text{-C-2,6}$ ), 113.1 (d,  $\text{Ar}^1\text{-C-2,6}$ ), 112.8 (d,  $\text{Ar}_{\text{crown-C-3,6}}$ ), 70.8 (t,  $\text{CH}_2\text{-crown}$ ), 70.3 (t,  $\text{CH}_2\text{-crown}$ ), 68.3 (t,  $\text{CH}_2\text{-crown}$ ), 67.1 (t,  $\text{Ar}^3\text{-OCH}_2$ ), 63.5 (t,  $\text{Ar}^1\text{-OCH}_2$ ), 63.2 (s,  $\text{C}(t\text{BuAr})_3\text{Ar}^1$ ), 58.1 (t,  $\text{Ar}^2\text{-OCH}_2$ ), 51.9 (t,  $\text{Ar}^2\text{-CH}_2$ ), 51.7 (t,  $\text{Ar}^3\text{-CH}_2$ ), 51.5 (t,  $\text{Tri-CH}_2\text{CH}_2$ ), 38.4 (q,  $\text{CH}_{3\text{Tri}}$ ), 34.4 (s,  $\text{C}(\text{CH}_3)_3$ ), 31.5 (q,  $\text{C}(\text{CH}_3)_3$ ), 29.0 (t,  $\text{Ar}^1\text{-OCH}_2\text{CH}_2$ ), 25.4 (t,  $\text{Ar}^3\text{-OCH}_2\text{CH}_2$ ) ppm.

In addition, signals of an additional ring were observed. Intergration estimated approx. one equivalent.

**IR** (ATR):  $\tilde{\nu}$  = 2952 (w, aliph. CH), 1506, 1453 (m, arom.), 1246, 1102, 1053 (m, CO), 837 (s, 1,4-disubst.), 742 (m, 1,2-disubst.), 557 (s, PF<sub>6</sub>) cm<sup>-1</sup>.

**MS** (HR-ESI): C<sub>168</sub>H<sub>210</sub>N<sub>8</sub>O<sub>20</sub> calcd.  $m/z$  = 672.8885, found  $m/z$  = 640.8900 ( $\Delta$  = -1.4 ppm),  
 C<sub>160</sub>H<sub>210</sub>F<sub>6</sub>N<sub>8</sub>O<sub>20</sub>P calcd.  $m/z$  = 945.5060, found  $m/z$  = 945.5042 ( $\Delta$  = -1.89 ppm),  
 C<sub>160</sub>H<sub>210</sub>F<sub>12</sub>N<sub>8</sub>O<sub>20</sub>P<sub>2</sub> calcd.  $m/z$  = 1490.7413, found  $m/z$  = 1490.7394 ( $\Delta$  = -1.31 ppm).

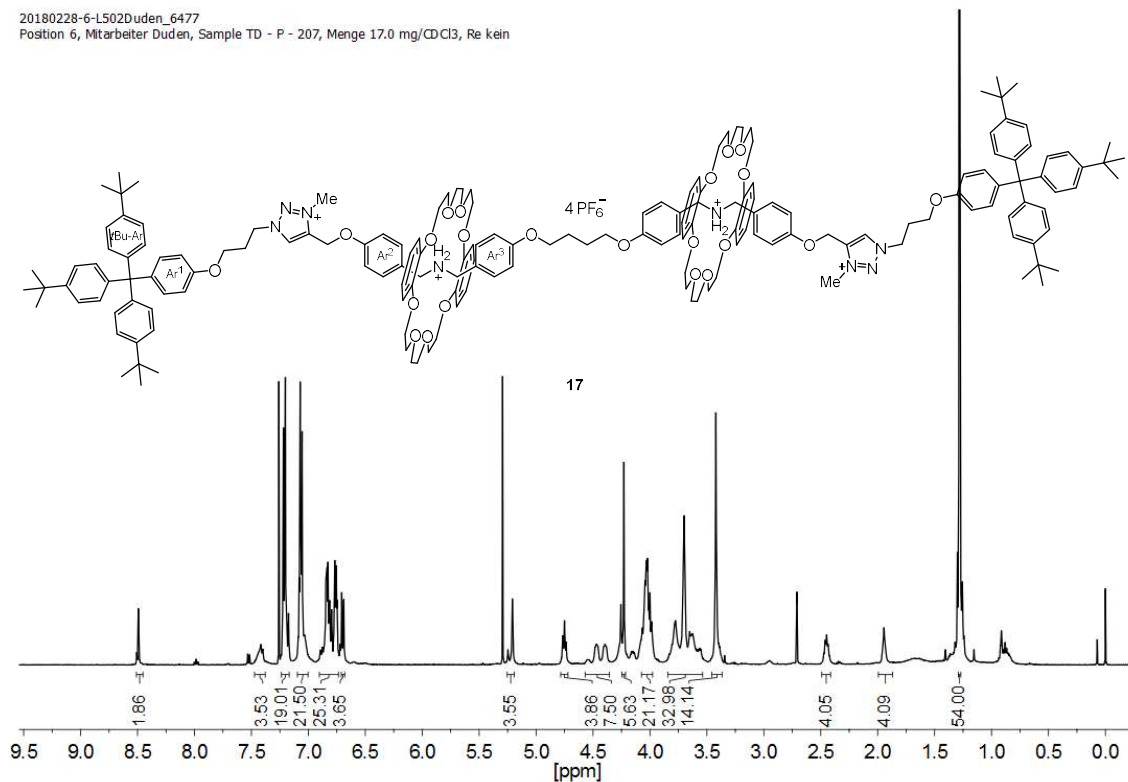

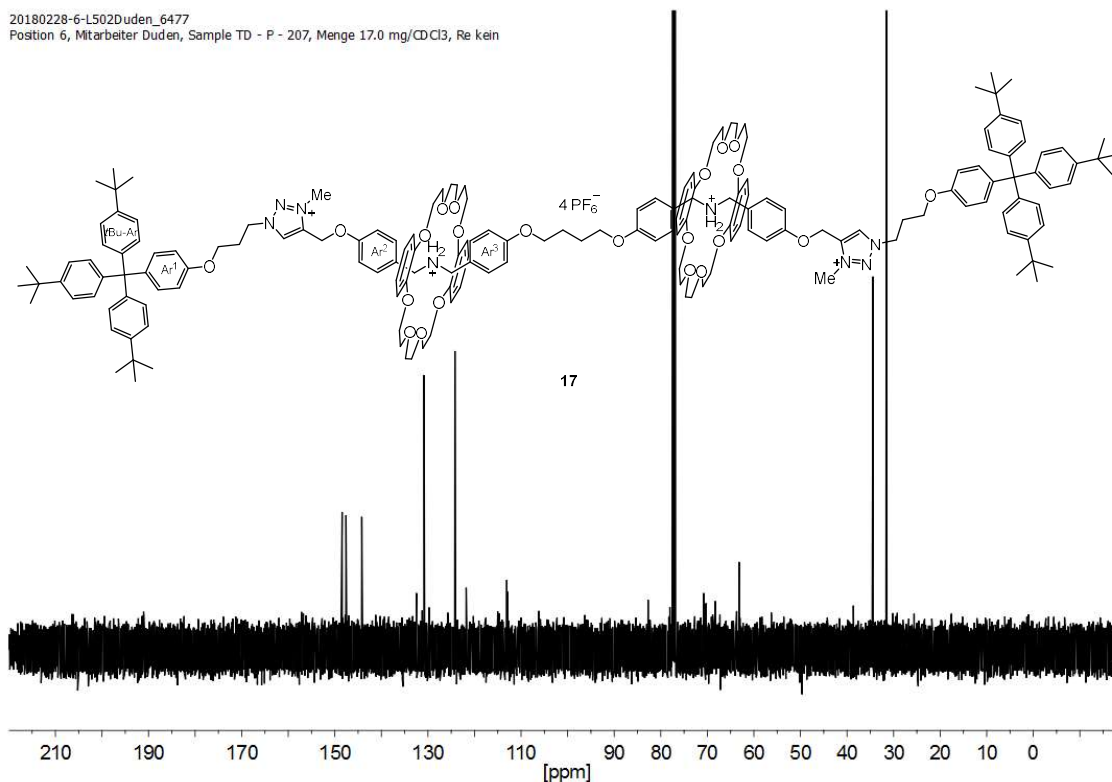

**1<sup>4</sup>-(Bromomethyl)-1,12-[1,2]dibenzena-2,5,8,11,13,16,19,22-octaoxadocosaphan (DB24C8-CH<sub>2</sub>Br) (24)**

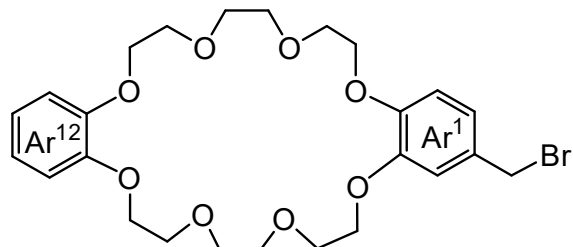

**24**

Under nitrogen atmosphere, DB24C8-CH<sub>2</sub>OH [5] (**23**, 500 mg, 1.05 mmol) was added in dry. Dichloromethane (20 mL) was dissolved and phosphorus tribromide (150  $\mu$ L, 1.57 mmol) dissolved in dry dichloromethane (10 mL) was added under ice cooling. The solution was stirred for 2 h at room temp. and then water (15 mL) was added. The phases were separated and the aqueous phase extracted with dichloromethane (3 x 10 mL each). The organic phases were washed with saturated sodium chloride solution (50 mL), dried over sodium sulfate, filtered and the solvent was removed under vacuum. A pale yellow solid was obtained.

**Yield:** 572 mg (1.05 mmol, quant).

**Meltingpoint:** 94 °C.

**<sup>1</sup>H-NMR** (600 MHz, CDCl<sub>3</sub>):  $\delta$  = 6.95-6.85 (m, 6 H, Ar<sup>1</sup>-H-3,5, Ar<sup>12</sup>-H-3,4,5,6), 6.79 (d, <sup>3</sup>J = 8.1 Hz, 1 H, Ar<sup>1</sup>-H-6), 4.46 (s, 2 H, CH<sub>2</sub>Br), 4.19-4.12 (m, 8 H, CH<sub>2</sub>), 3.94-3.88 (m, 8 H, CH<sub>2</sub>), 3.83-3.82 (m, 8 H, CH<sub>2</sub>) ppm.

**$^{13}\text{C}$ -NMR** (150 MHz,  $\text{CDCl}_3$ ):  $\delta$  = 149.3 (s,  $\text{Ar}^1\text{-C-1}$ ), 149.1 (s,  $\text{Ar}^{12}\text{-C-1,2}$ ), 149.0 (s,  $\text{Ar}^1\text{-C-2}$ ), 130.9 (s,  $\text{Ar}^1\text{-C-4}$ ), 122.2 (d,  $\text{Ar}^1\text{-C-5}$ ), 121.6 (d,  $\text{Ar}^{12}\text{-C-4,5}$ ), 114.8 (d,  $\text{Ar}^1\text{-C-3}$ ), 114.2 (d,  $\text{Ar}^{12}\text{-C-3,6}$ ), 113.6 (d,  $\text{Ar}^1\text{-C-6}$ ), 71.4 (t,  $\text{CH}_2$ ), 70.1 (t,  $\text{CH}_2$ ), 69.92 (t,  $\text{CH}_2$ ), 69.91 (t,  $\text{CH}_2$ ), 69.61 (t,  $\text{CH}_2$ ), 69.58 (t,  $\text{CH}_2$ ), 69.53 (t,  $\text{CH}_2$ ), 69.51 (t,  $\text{CH}_2$ ), 34.4 (t,  $\text{CH}_2\text{Br}$ ) ppm.

**IR** (ATR):  $\tilde{\nu}$  = 2928, 2870 (m, aliph. CH), 1506 (s, arom.), 1124, 1102 (s. CO), 727 (s, 1,2-disubst.)  $\text{cm}^{-1}$ .

**MS** (HR-El):  $\text{C}_{25}\text{H}_{33}^{79}\text{BrO}_8$  bzw.  $\text{C}_{25}\text{H}_{33}^{81}\text{BrO}_8$  calcd.  $m/z$  = 540.1359 or 542.1338, found  $m/z$  = 440.1351 or 542.1335 ( $\Delta$  = -1.51 or -0.70 ppm).

**Elemental analysis:**  $\text{C}_{25}\text{H}_{33}\text{BrO}_8$ : calcd. C 55.46, H 6.14, found C 55.84, H 6.65.

L602Dude\_6971  
6971, Duden, TD - P - 74, 8.0 mg/ $\text{CDCl}_3$   
300K

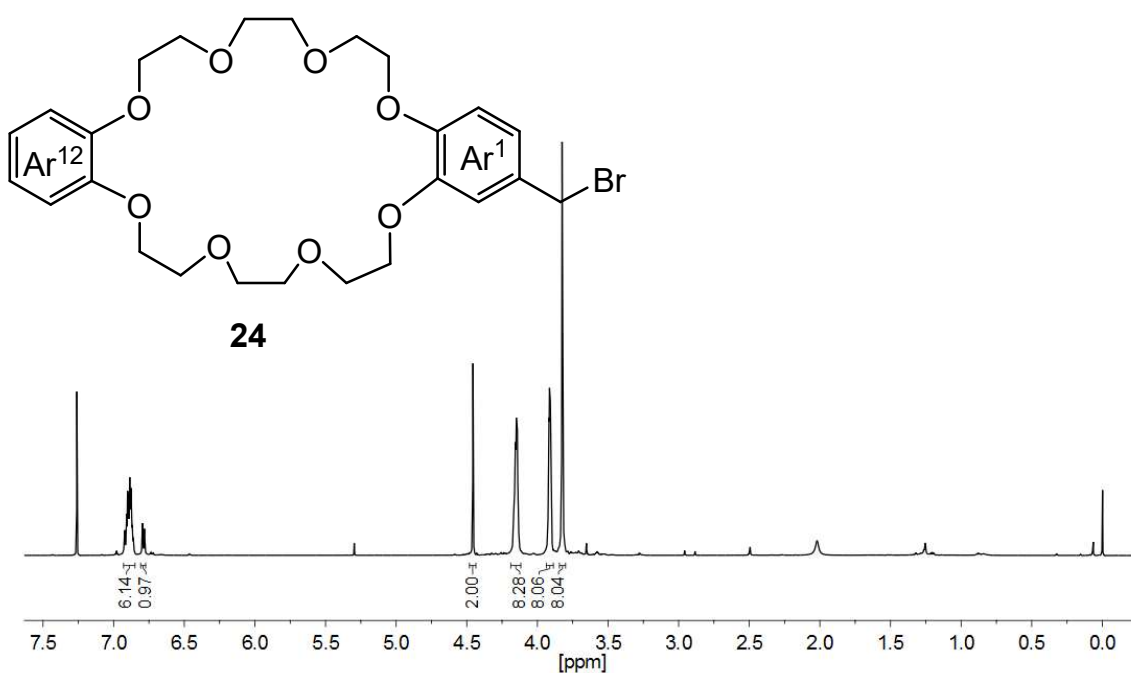

L602Dude\_6971  
6971, Duden, TD - P - 74, 8.0 mg/CDCl<sub>3</sub>  
300K

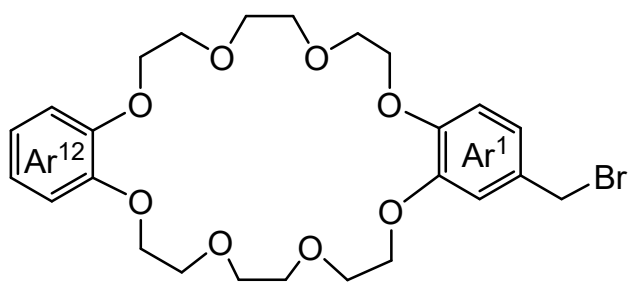

**24**

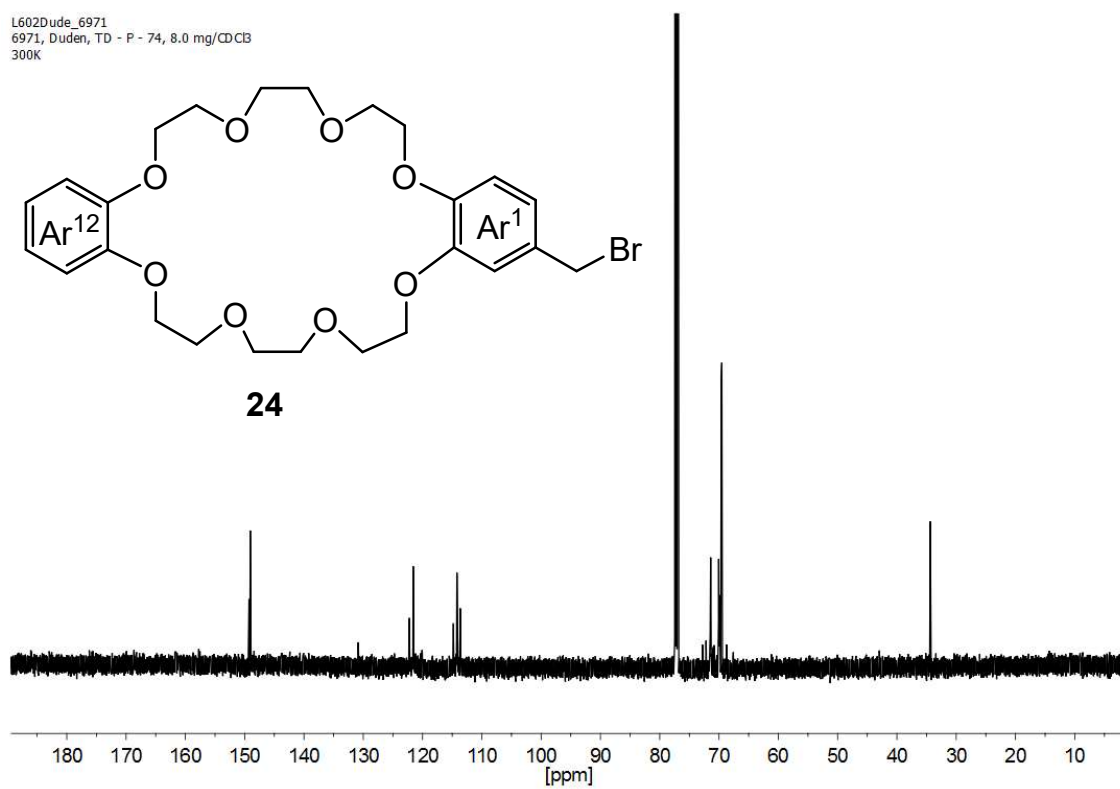

**1-(Benzyloxy)-4-(8-bromooctyloxy)benzene (26d)**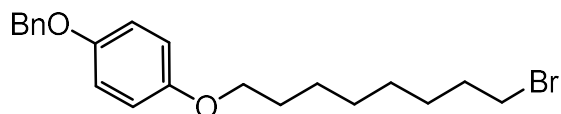**26d**

Under nitrogen atmosphere, 4-benzyloxyphenol **25** (8.00 g, 40.0 mmol) and potassium carbonate (11.0 g, 80.0 mmol) were suspended in acetonitrile (100 mL) and 1,8-dibromooctane (32.6 g, 120 mmol) was added. The suspension was stirred under reflux for 20 h and then filtered. The solvent was removed in vacuo and the residue was dissolved with dichloromethane (200 mL). The organic layer was washed with 10% aqueous sodium hydroxide solution (4 x 50 mL), dried with magnesium sulfate and filtered. The solvent was removed in vacuo and the residue was recrystallized from *n*-hexane. A colorless solid was obtained.

**Yield:** 11.8 g (30.1 mmol, 75 %).

**Melting point:** 78 °C.

**<sup>1</sup>H-NMR** (500 MHz, CDCl<sub>3</sub>):  $\delta$  = 7.42 (d, <sup>3</sup>*J* = 7.4 Hz, 2 H, Bn-*H*-2,6), 7.40-7.35 (m, 2 H, Bn-*H*-3,5), 7.34-7.29 (m, 1 H, Bn-*H*-4), 6.92-6.87 (m, 2 H, Ar-*H*-2,6), 6.85-6.79 (m, 2 H, Ar-*H*-3,5), 5.01 (s, 2 H, PhCH<sub>2</sub>O), 3.90 (t, <sup>3</sup>*J* = 6.5 Hz, 2 H, OCH<sub>2</sub>CH<sub>2</sub>), 3.41 (t, <sup>3</sup>*J* = 6.8 Hz, 2 H, CH<sub>2</sub>Br), 1.90-1.82 (m, 2 H, CH<sub>2</sub>CH<sub>2</sub>Br), 1.79-1.71 (m, 2 H, OCH<sub>2</sub>CH<sub>2</sub>), 1.49-1.41 (m, 4 H, OCH<sub>2</sub>CH<sub>2</sub>CH<sub>2</sub>, CH<sub>2</sub>CH<sub>2</sub>CH<sub>2</sub>Br), 1.39-1.30 (m, 4 H, OCH<sub>2</sub>CH<sub>2</sub>CH<sub>2</sub>CH<sub>2</sub>, CH<sub>2</sub>CH<sub>2</sub>CH<sub>2</sub>CH<sub>2</sub>Br) ppm.

**<sup>13</sup>C-NMR** (125 MHz, CDCl<sub>3</sub>):  $\delta$  = 153.6 (s, Ar-C-1), 153.0 (s, Ar-C-4), 137.5 (s, Bn-C-1), 128.7 (d, Bn-C-3,5), 128.0 (d, Bn-C-4), 127.6 (d, Bn-C-2,6), 116.0 (d, Ar-C-2,6), 115.5 (d, Ar-C-3,5), 70.8 (t, PhCH<sub>2</sub>O), 68.6 (t, OCH<sub>2</sub>CH<sub>2</sub>), 34.1 (t, CH<sub>2</sub>Br), 32.9 (t, CH<sub>2</sub>CH<sub>2</sub>Br), 29.3 (t, OCH<sub>2</sub>CH<sub>2</sub>), 28.8 (t, OCH<sub>2</sub>CH<sub>2</sub>CH<sub>2</sub>), 28.2 (t, CH<sub>2</sub>CH<sub>2</sub>CH<sub>2</sub>Br), 26.1 (t, CH<sub>2</sub>CH<sub>2</sub>CH<sub>2</sub>CH<sub>2</sub>Br), 25.5 (t, OCH<sub>2</sub>CH<sub>2</sub>CH<sub>2</sub>CH<sub>2</sub>) ppm.

**IR** (ATR):  $\tilde{\nu}$  = 2934, 2859 (w, aliph. CH), 1507, 1464, 1454 (s, arom.), 1226, 1022 (s, CO), 824 (s, 1,4-disubst.), 737 (s, monosubst.), 694 (s, monosubst.) cm<sup>-1</sup>.

**MS** (HR-EI): C<sub>21</sub>H<sub>27</sub><sup>79</sup>BrO<sub>2</sub> calcd. *m/z* = 390.1194, found *m/z* = 390.1188 ( $\Delta$  = -1.59 ppm). C<sub>21</sub>H<sub>27</sub><sup>81</sup>BrO<sub>2</sub> calcd. *m/z* = 392.1174, found *m/z* = 392.1170 ( $\Delta$  = -0.93 ppm).

**Elemental analysis:** C<sub>21</sub>H<sub>27</sub>BrO<sub>2</sub>: calcd. C 64.45, H 6.95, found C 64.43, H 6.96.

20180712-13-L507Duden\_8062  
 Position 13, Mitarbeiter Duden, Sample TD - P - 254, Menge 10.0 mg/CDCl<sub>3</sub>, Re kein

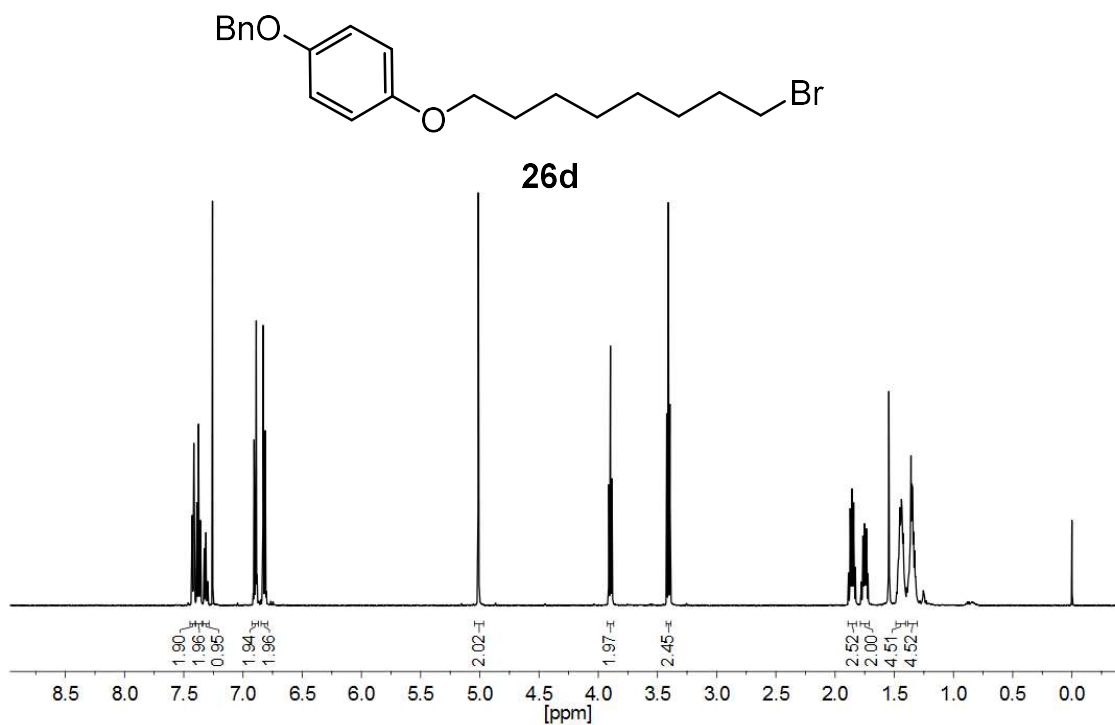

20180712-13-L507Duden\_8062  
 Position 13, Mitarbeiter Duden, Sample TD - P - 254, Menge 10.0 mg/CDCl<sub>3</sub>, Re kein

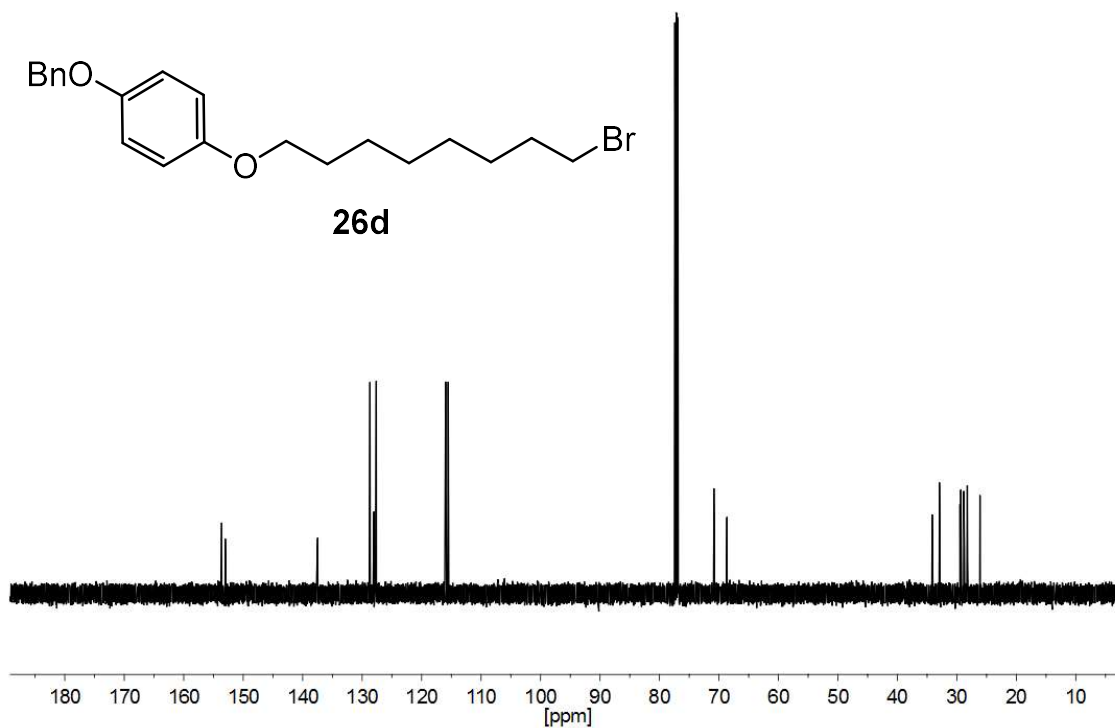



**4-(4-Azidobutyloxy)phenol (28b)**

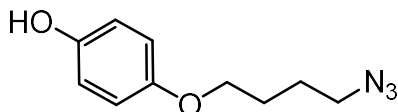

**28b**

Bromide **27b** (4.38 g, 17.9 mmol) was dissolved in dimethylsulfoxide (20 mL), sodium azide (3.49 g, 53.7 mmol) was added and the mixture was stirred at room temp. for 18 h. Water (20 mL) was added and the aqueous layer was extracted with diethyl ether (3 x 20 mL). The organic layer was dried with magnesium sulfate, filtered and the solvent was removed in vacuo. The crude product was purified by chromatography using silica gel [dichloromethane → dichloromethane/methanol (93 : 7);  $R_f$  = 0.3] cleaned. A colorless oil was obtained.

**Yield:** 2.56 g (12.3 mmol, 69 %).

**$^1\text{H-NMR}$**  (500 MHz,  $\text{CDCl}_3$ ):  $\delta$  = 6.80-6.73 (m, 4 H, Ar-*H*-2,3,5,6), 4.66 (s, 1 H, OH), 3.93 (t,  $^3J$  = 5.9 Hz, 2 H,  $\text{OCH}_2$ ), 3.36 (t,  $^3J$  = 6.6 Hz, 2 H,  $\text{CH}_2\text{N}_3$ ), 1.88-1.75 (m, 4 H,  $\text{CH}_2\text{CH}_2\text{N}_3$ ),  $\text{OCH}_2\text{CH}_2$ ) ppm.

**$^{13}\text{C-NMR}$**  (125 MHz,  $\text{CDCl}_3$ ):  $\delta$  = 153.2 (s, Ar-C-4), 149.7 (s, Ar-C-1), 116.2 (d, Ar-C-2,6), 115.7 (d, Ar-C-3,5), 68.0 (t,  $\text{OCH}_2$ ), 51.4 (t,  $\text{CH}_2\text{N}_3$ ), 28.1 (t,  $\text{CH}_2\text{CH}_2\text{N}_3$ ), 26.7 (t,  $\text{OCH}_2\text{CH}_2$ ) ppm.

**IR** (ATR):  $\tilde{\nu}$  = 3394 (br. m, OH), 2955, 2928, 2904, 2869 (w, aliph. CH), 2102 (s, azide), 1506, 1451 (s, arom.), 1223, 1058 (s, CO), 821 (s, 1,4-disubst.)  $\text{cm}^{-1}$ .

**MS** (HR-El):  $\text{C}_{10}\text{H}_{13}\text{N}_3\text{O}_2$  calcd.  $m/z$  = 207.1008, found  $m/z$  = 207.1011 ( $\Delta$  = 1.30 ppm).

**Elemental analysis:**  $\text{C}_{10}\text{H}_{13}\text{N}_3\text{O}_2 \cdot 0.2 \text{ H}_2\text{O}$ : calcd. C 56.73, H 6.43, N 19.85, found C 56.87, H 6.22, N 19.63.

20180718-17-L507Duden\_8120  
 Position 17, Mitarbeiter Duden, Sample TD - P - 258, Menge 11.0 mg/CDCl<sub>3</sub>, Re kein

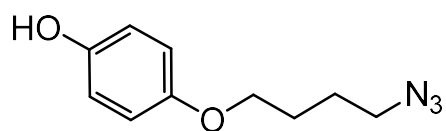

**28b**

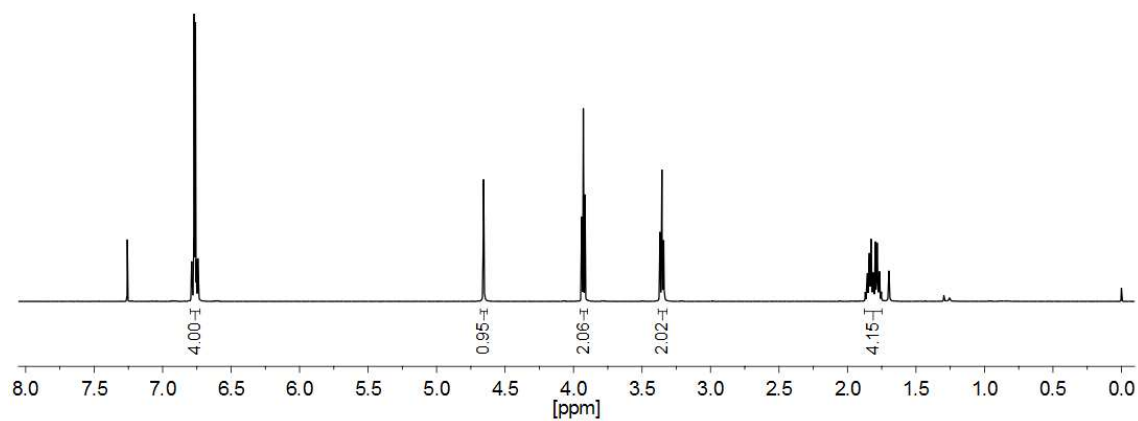

20180718-17-L507Duden\_8120  
 Position 17, Mitarbeiter Duden, Sample TD - P - 258, Menge 11.0 mg/CDCl<sub>3</sub>, Re kein

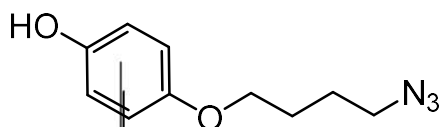

**28b**

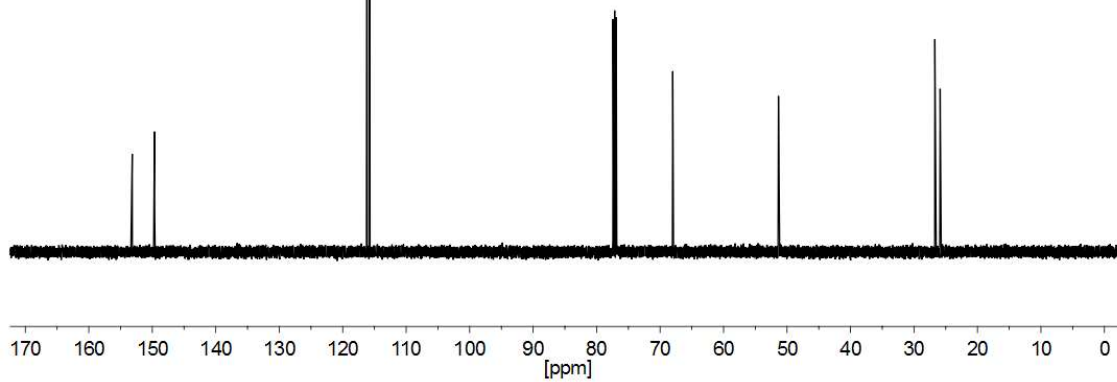

**4-(6-Azidohexyloxy)phenol (28c)**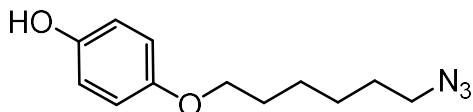**28c**

Bromide **27c** (1.61 g, 5.92 mmol) was dissolved in dimethylsulfoxide (20 mL), sodium azide (1.54 g, 23.7 mmol) was added and the mixture was stirred at room temp. for 18 h. Water (20 mL) was added and the aqueous layer was extracted with diethyl ether (3 x 20 mL). The organic layer was dried with magnesium sulfate, filtered and the solvent was removed in vacuo. The crude product was purified by chromatography using silica gel [dichloromethane → dichloromethane/methanol (93 : 7);  $R_f$  = 0.3] cleaned. A colorless oil was obtained.

**Yield:** 845 mg (3.84 mmol, 65 %).

**$^1\text{H-NMR}$**  (500 MHz,  $\text{CDCl}_3$ ):  $\delta$  = 6.80-6.72 (m, 4 H, Ar-*H*-2,3,5,6), 4.79 (s, 1 H, OH), 3.90 (t,  $^3J$  = 6.4 Hz, 2 H,  $\text{OCH}_2$ ), 3.28 (t,  $^3J$  = 6.9 Hz, 2 H,  $\text{CH}_2\text{N}_3$ ), 1.82-1.71 (m, 2 H,  $\text{OCH}_2\text{CH}_2$ ), 1.67-1.59 (m, 2 H,  $\text{CH}_2\text{CH}_2\text{N}_3$ ), 1.55-1.38 (m, 4 H,  $\text{CH}_2\text{CH}_2\text{CH}_2\text{CH}_2\text{N}_3$ ) ppm.

**$^{13}\text{C-NMR}$**  (125 MHz,  $\text{CDCl}_3$ ):  $\delta$  = 153.3 (s, Ar-*C*-4), 149.7 (s, Ar-*C*-1), 116.2 (d, Ar-*C*-2,6), 115.7 (d, Ar-*C*-3,5), 68.6 (t,  $\text{OCH}_2$ ), 51.5 (t,  $\text{CH}_2\text{N}_3$ ), 29.4 (t,  $\text{OCH}_2\text{CH}_2$ ), 28.9 (t,  $\text{CH}_2\text{CH}_2\text{N}_3$ ), 26.7 (t,  $\text{CH}_2\text{CH}_2\text{CH}_2\text{N}_3$ ), 25.8 (t,  $\text{OCH}_2\text{CH}_2\text{CH}_2$ ) ppm.

**IR** (ATR):  $\tilde{\nu}$  = 3369 (br. m, OH), 2937, 2862 (m, aliph. CH), 2092 (s, azide), 1508, 1446 (s, arom.), 1207, 1027 (CO), 825 (s, 1,4-disubst.)  $\text{cm}^{-1}$ .

**MS** (HR-El):  $\text{C}_{12}\text{H}_{17}\text{N}_3\text{O}_2$  calcd.  $m/z$  = 235.1321, found  $m/z$  = 235.1329 ( $\Delta$  = 3.40 ppm).

**Elemental analysis:**  $\text{C}_{12}\text{H}_{17}\text{N}_3\text{O}_2$ : calcd. C 61.26, H 7.28, N 17.86, found C 61.38, H 7.42, N 17.59.

20180119-3-P501Paschelke\_5917  
 Position 3, Mitarbeiter Paschelke, Sample TP 005 a, Menge 6.0 mg/CDCl<sub>3</sub>, Re kein

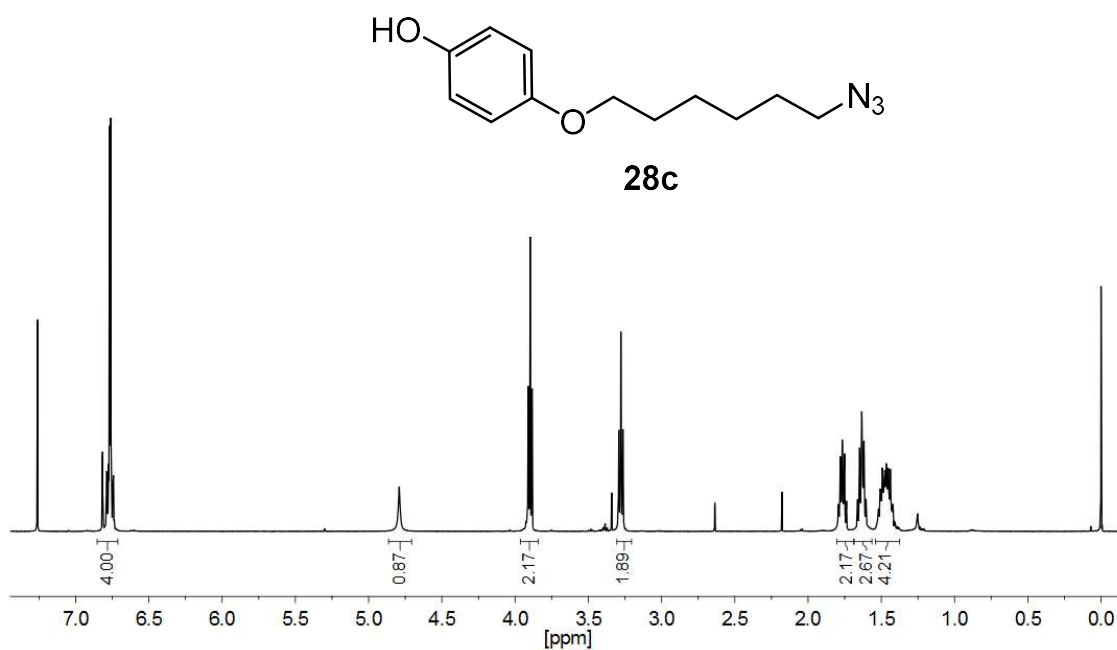

20180119-3-P501Paschelke\_5917  
 Position 3, Mitarbeiter Paschelke, Sample TP 005 a, Menge 6.0 mg/CDCl<sub>3</sub>, Re kein

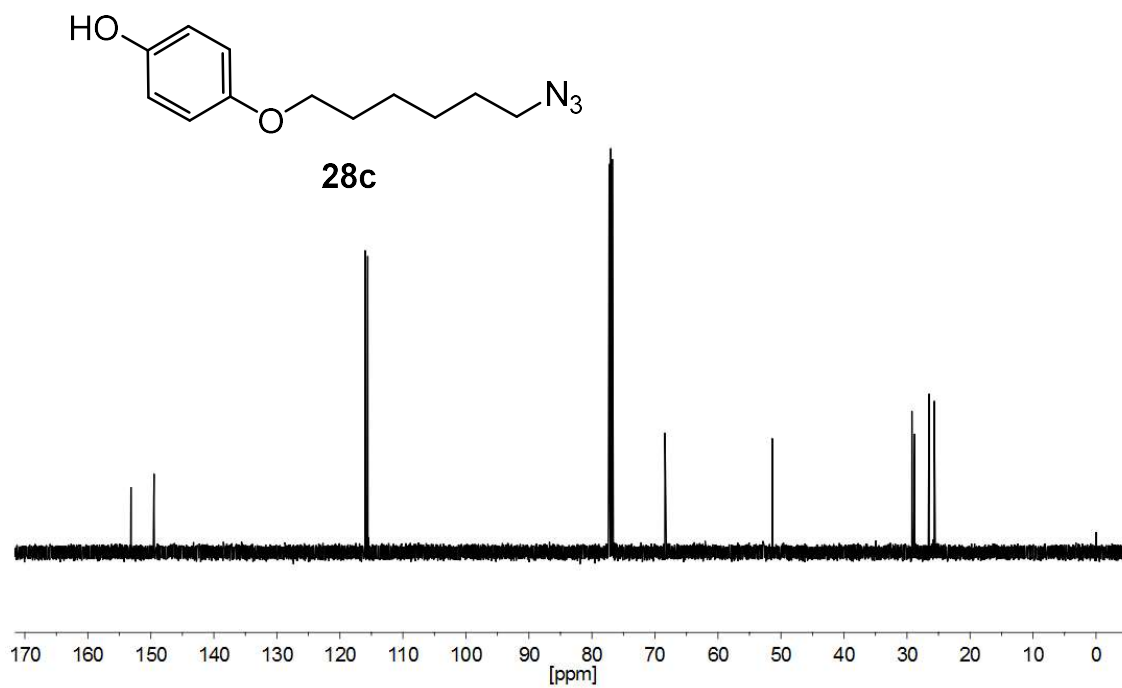

#### 4-(8-Azidoctyloxy)phenol (**28d**)

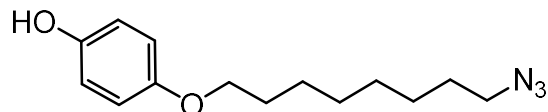

**28d**

Bromide **27d** (5.00 g, 16.6 mmol) was dissolved in dimethylsulfoxide (20 mL), sodium azide (3.23 g, 50.0 mmol) was added and the mixture was stirred at room temp. for 18 h. Water (20 mL) was added and the aqueous layer was extracted with diethyl ether (3 x 20 mL). The organic layer was dried with magnesium sulfate, filtered and the solvent was removed under vacuum. The crude product was purified by chromatography using silica gel [dichloromethane → dichloromethane/methanol (93 : 7);  $R_f$  = 0.3] cleaned. A colorless oil was obtained.

**Ausbeute:** 3.91 g (14.9 mmol, 90 %).

**$^1\text{H-NMR}$**  (500 MHz,  $\text{CDCl}_3$ ):  $\delta$  = 6.81-6.71 (m, 4 H, Ar-*H*-2,3,5,6), 5.04 (s, 1 H, OH), 3.89 (t,  $^3J$  = 6.6 Hz, 2 H,  $\text{OCH}_2$ ), 3.25 (t,  $^3J$  = 7.0 Hz, 2 H,  $\text{CH}_2\text{N}_3$ ), 1.79-1.70 (m, 2 H,  $\text{OCH}_2\text{CH}_2$ ), 1.64-1.55 (m, 2 H,  $\text{CH}_2\text{CH}_2\text{N}_3$ ), 1.49-1.41 (m, 2 H,  $\text{OCH}_2\text{CH}_2\text{CH}_2$ ), 1.40-1.29 (m, 6 H,  $\text{CH}_2\text{CH}_2\text{CH}_2\text{N}_3$ ,  $\text{OCH}_2\text{CH}_2\text{CH}_2\text{CH}_2$ ,  $\text{CH}_2\text{CH}_2\text{CH}_2\text{CH}_2\text{N}_3$ ) ppm.

**$^{13}\text{C-NMR}$**  (125 MHz,  $\text{CDCl}_3$ ):  $\delta$  = 153.3 (s, Ar-C-4), 149.6 (s, Ar-C-1), 116.2 (d, Ar-C-2,6), 115.8 (d, Ar-C-3,5), 68.9 (t,  $\text{OCH}_2$ ), 51.6 (t,  $\text{CH}_2\text{N}_3$ ), 29.4 (t,  $\text{OCH}_2\text{CH}_2$ ), 29.3 (t,  $\text{OCH}_2\text{CH}_2\text{CH}_2\text{CH}_2$ ), 29.2 (t,  $\text{CH}_2\text{CH}_2\text{CH}_2\text{CH}_2\text{N}_3$ ), 28.9 (t,  $\text{CH}_2\text{CH}_2\text{N}_3$ ), 26.7 (t,  $\text{CH}_2\text{CH}_2\text{CH}_2\text{N}_3$ ), 26.0 (t,  $\text{OCH}_2\text{CH}_2\text{CH}_2$ ) ppm.

**IR** (ATR):  $\tilde{\nu}$  = 3419 (br. s, OH), 2930, 2854 (s, aliph. CH), 2117 (s, azide), 1510, 1453 (s, arom.), 1229, 1034 (CO), 822 (s, 1,4-disubst.)  $\text{cm}^{-1}$ .

**MS** (HR-EI):  $\text{C}_{14}\text{H}_{21}\text{N}_3\text{O}_2$  calcd.  $m/z$  = 263.1634, found  $m/z$  = 263.1647 ( $\Delta$  = 4.84 ppm).

**Elemental analysis:**  $\text{C}_{14}\text{H}_{21}\text{N}_3\text{O}_2$ : calcd. C 63.85, H 8.04, N 15.96, found C 63.67, H 8.03, N 15.94.

180815-41-L208Duden  
 Praktikant/Mitarbeiter Duden, Substanz TD-P-270 F1, Menge 12 mg  
 1H64-noplot CDCl3 {D:\uen\18\08} nmrsu 41

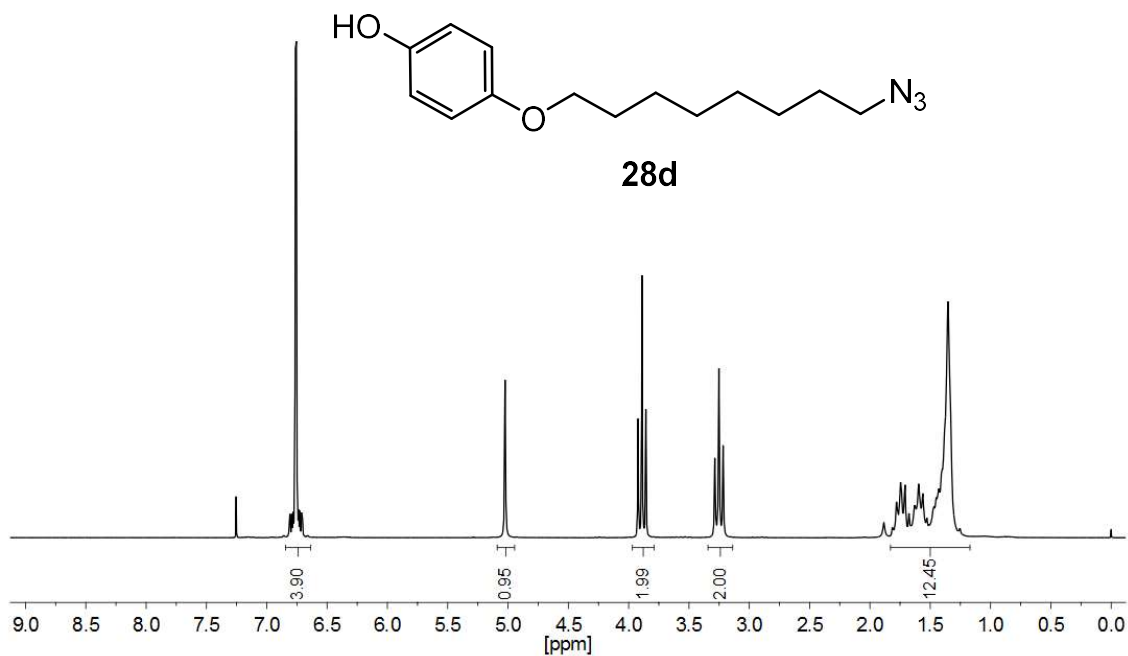

20180815-28-L508Duden\_8465  
 Position 28, Mitarbeiter Duden, Sample TD - P - 270 F 1, Menge 12.0 mg/CDCl3, Re kein

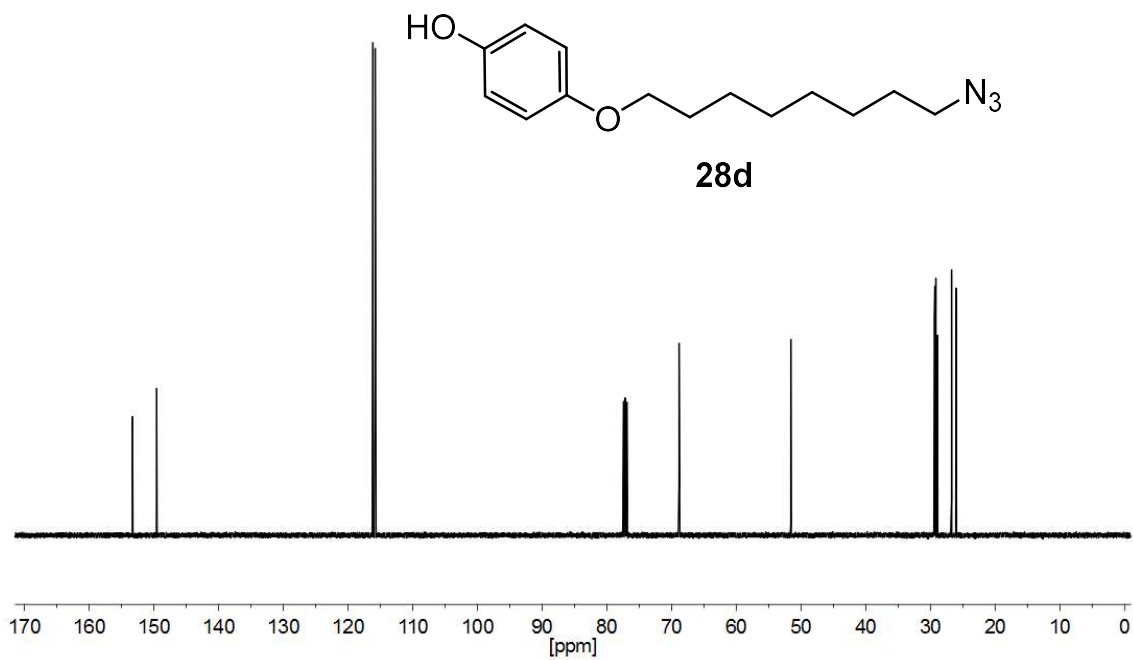

#### 4-{2-[2-(2-Azidoethoxy)ethoxy]ethoxy}phenol (**32**)

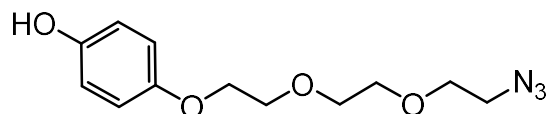

**32**

Under nitrogen atmosphere, 4-(2-{2-[2-(4'-methylbenzenesulfonyloxy)ethoxy]ethoxy}ethoxy)phenol **31** [6] (2.10 g, 5.30 mmol) and sodium azide (4.00 g, 61.5 mmol) were suspended in dry dimethylformamide (20 mL) and stirred at 70 °C for 2 d. Water (50 mL) was added to the suspension and the aqueous phase was extracted with dichloromethane (4 x 50 mL). The organic phase was dried over magnesium sulfate, filtered and the solvent was removed under vacuum. The raw product was cleaned on silica gel [cyclohexane : ethyl acetate (1 : 1);  $R_f$  = 0.5] cleaned. A colourless oil was obtained.

**Yield:** 1.16 g (4.35 mmol, 84 %).

**$^1\text{H-NMR}$**  (500 MHz,  $\text{CDCl}_3$ ):  $\delta$  = 6.79-6.71 (m, 4 H, Ar-*H*-2,3,5,6), 4.09-4.02 (m, 2 H, Ar- $\text{OCH}_2$ ), 3.87-3.82 (m, 2 H, Ar- $\text{OCH}_2\text{CH}_2$ ), 3.77-3.72 (m, 2 H, Ar- $\text{OCH}_2\text{CH}_2\text{OCH}_2$ ), 3.72-3.64 (m,  $\text{CH}_2\text{OCH}_2\text{CH}_2\text{N}_3$ ), 3.41-3.35 (m, 2 H,  $\text{CH}_2\text{N}_3$ ) ppm.

**$^{13}\text{C-NMR}$**  (125 MHz,  $\text{CDCl}_3$ ):  $\delta$  = 152.9 (s, Ar-*C*-4), 150.0 (s, Ar-*C*-1), 116.2 (d, Ar-*C*-2,6), 115.9 (d, Ar-*C*-3,5), 70.9 (t, Ar- $\text{OCH}_2\text{CH}_2\text{OCH}_2$ ), 70.8 (t,  $\text{CH}_2\text{OCH}_2\text{CH}_2\text{N}_3$ ), 70.2 (t,  $\text{CH}_2\text{CH}_2\text{N}_3$ ), 70.1 (t, Ar- $\text{OCH}_2\text{CH}_2$ ), 68.2 (t, Ar- $\text{OCH}_2$ ), 50.8 (t,  $\text{CH}_2\text{N}_3$ ) ppm.

**IR** (ATR):  $\tilde{\nu}$  = 3366 (br. m, OH), 2873 (m, aliph. CH), 2100 (s, azide), 1509, 1444 (s, arom.), 1211, 1101, 1062 (s, CO.), 826 (s, 1,4-disubst.)  $\text{cm}^{-1}$ .

**MS** (HR-ESI):  $\text{C}_{12}\text{H}_{17}\text{N}_3\text{NaO}_3$  calcd.  $m/z$  = 290.1111, found  $m/z$  = 290.1110 ( $\Delta$  = -0.53 ppm)

**Elemental analysis:**  $\text{C}_{12}\text{H}_{17}\text{N}_3\text{O}_3$ : calcd. C 53.92, H 6.41, N 15.72, found C 53.99, H 6.46, N 15.69.

20181102-26-LS11Duden\_9534  
 Position 26, Mitarbeiter Duden, Sample TD - P -302, Menge 11.0 mg/CDCl<sub>3</sub>, Re kein

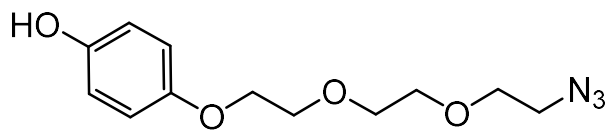

**32**

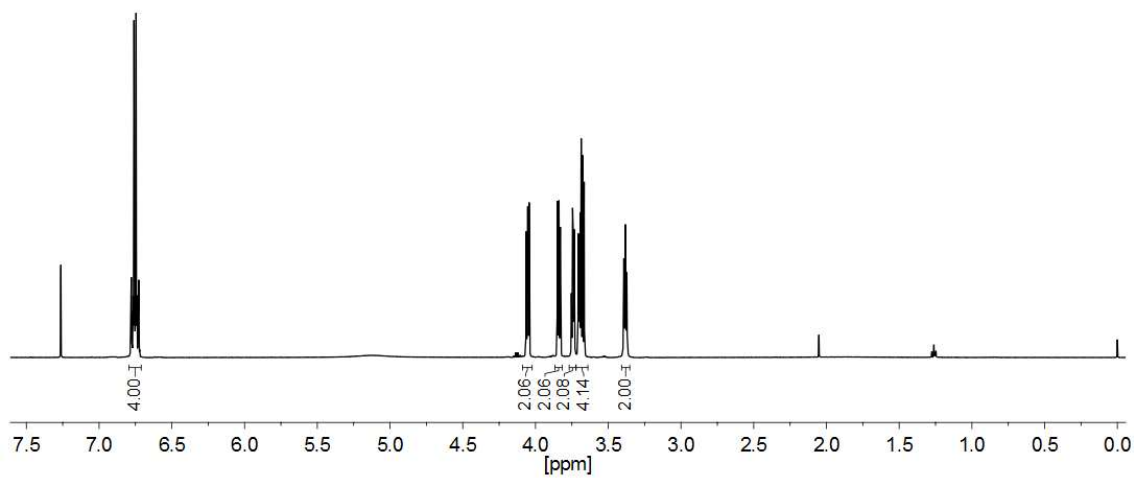

20181102-26-LS11Duden\_9534  
 Position 26, Mitarbeiter Duden, Sample TD - P -302, Menge 11.0 mg/CDCl<sub>3</sub>, Re kein

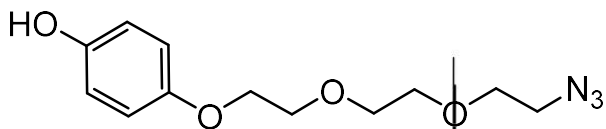

**32**

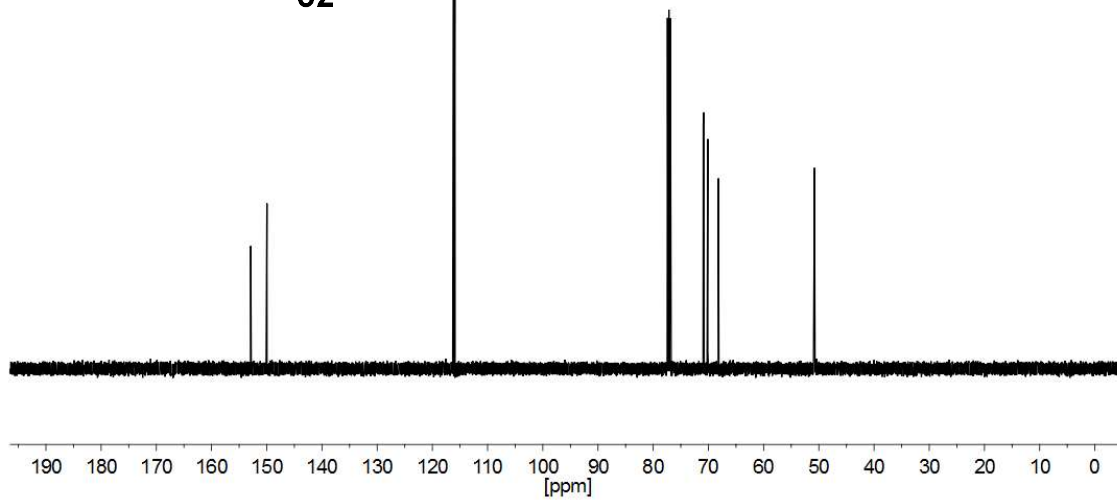



**1<sup>4</sup>-[4-(2-Azidoethoxy)phenoxy]methyl]-1,12-[1,2]dibenzena-2,5,8,11,13,16,19,22-octaoxadocosaphan (33a)**

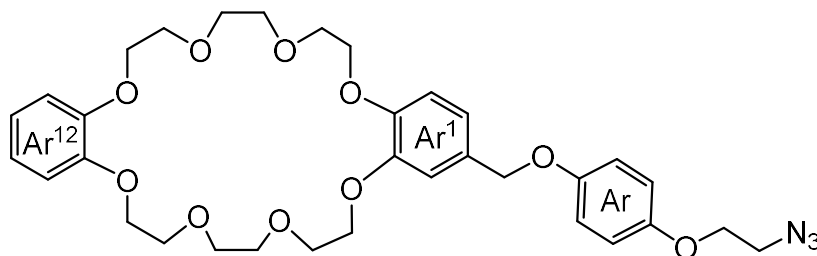

**33a**

Under nitrogen atmosphere, phenol **28a** [7] (200 mg, 1.11 mmol) and cesium carbonate (723 mg, 2.22 mmol) were suspended in dry acetone (100 mL) and stirred under reflux for 2 h. A catalytic amount of potassium iodide and DB24C8-CH<sub>2</sub>Br (**24**, 850 mg, 1.57 mmol) were then added and stirred for 16 h under reflux. After cooling, water (50 mL) was added and the aqueous phase extracted with dichloromethane (3 x 50 mL each). The organic phase was dried over magnesium sulphate, filtered and the solvent removed in a vacuum. The raw product was cleaned on silica gel [dichloromethane : acetonitrile (1 : 0) → (3 : 1)]. The colorless solids were recrystallized from *n*-hexane/chloroform.

**Yield:** 404 mg (632 μmol, 57 %).

**Meltingpoint:** 84 °C.

**<sup>1</sup>H-NMR** (500 MHz, CDCl<sub>3</sub>): δ = 6.95-6.82 (m, 11 H, Ar<sup>1</sup>-H-3,5,6, Ar<sup>12</sup>-H-3,4,5,6, Ar-H-2,3,5,6), 4.91 (s, 2 H, Ar<sup>1</sup>-CH<sub>2</sub>), 4.16-4.12 (m, 8 H, Ar<sup>1</sup>-OCH<sub>2</sub>, Ar<sup>12</sup>-OCH<sub>2</sub>), 4.10 (t, <sup>3</sup>J = 5.3 Hz, 2 H, CH<sub>2</sub>CH<sub>2</sub>N<sub>3</sub>), 3.94-3.88 (m, 8 H, Ar<sup>1</sup>-OCH<sub>2</sub>CH<sub>2</sub>, Ar<sup>12</sup>-OCH<sub>2</sub>CH<sub>2</sub>), 3.83 (s, 8 H, Ar<sup>1</sup>-OCH<sub>2</sub>CH<sub>2</sub>OCH<sub>2</sub>, Ar<sup>12</sup>-OCH<sub>2</sub>CH<sub>2</sub>OCH<sub>2</sub>), 3.56 (t, <sup>3</sup>J = 5.3 Hz, 2 H, CH<sub>2</sub>N<sub>3</sub>) ppm.

**<sup>13</sup>C-NMR** (125 MHz, CDCl<sub>3</sub>): δ = 153.6 (s, Ar-C-1), 152.7 (s, Ar-C-4), 149.2 (s, Ar<sup>1</sup>-C-2), 149.1 (s, Ar<sup>12</sup>-C-1,2), 148.8 (s, Ar<sup>1</sup>-C-1), 130.3 (s, Ar<sup>1</sup>-C-4), 121.6 (d, Ar<sup>12</sup>-C-4,5), 120.8 (d, Ar<sup>1</sup>-C-5), 116.1 (d, Ar-C-2,6), 115.8 (s, Ar-C-3,5), 114.2 (d, Ar<sup>12</sup>-C-3,6), 113.9 (d, Ar<sup>1</sup>-C-6), 113.6 (d, Ar<sup>1</sup>-C-3), 71.43 (t, CH<sub>2</sub>), 71.41 (t, CH<sub>2</sub>), 70.8 (Ar<sup>1</sup>-CH<sub>2</sub>), 70.1 (t, CH<sub>2</sub>), 70.01 (t, CH<sub>2</sub>), 70.00 (t, CH<sub>2</sub>), 69.7 (t, CH<sub>2</sub>), 69.6 (t, CH<sub>2</sub>), 69.5 (t, CH<sub>2</sub>), 67.8 (t, CH<sub>2</sub>CH<sub>2</sub>N<sub>3</sub>), 50.4 (t, CH<sub>2</sub>N<sub>3</sub>) ppm.

**IR** (ATR):  $\tilde{\nu}$  = 2865 (m, aliph. CH), 2107 (s, azide), 1506, 1452 (s, arom.), 1257, 1214, 1123, 1054 (s, CO), 821 (s, 1,4-disubst.), 736 (s, 1,2-disubst.) cm<sup>-1</sup>.

**MS** (HR-ESI): C<sub>33</sub>H<sub>41</sub>N<sub>3</sub>NaO<sub>10</sub> calcd. *m/z* = 662.2684, found *m/z* = 662.2670 (Δ = -1.42 ppm).

**Elemental analysis:** C<sub>33</sub>H<sub>41</sub>N<sub>3</sub>O<sub>10</sub>: calcd. C 61.96, H 6.46, N 6.57, found C 61.89, H 6.47, N 6.88.

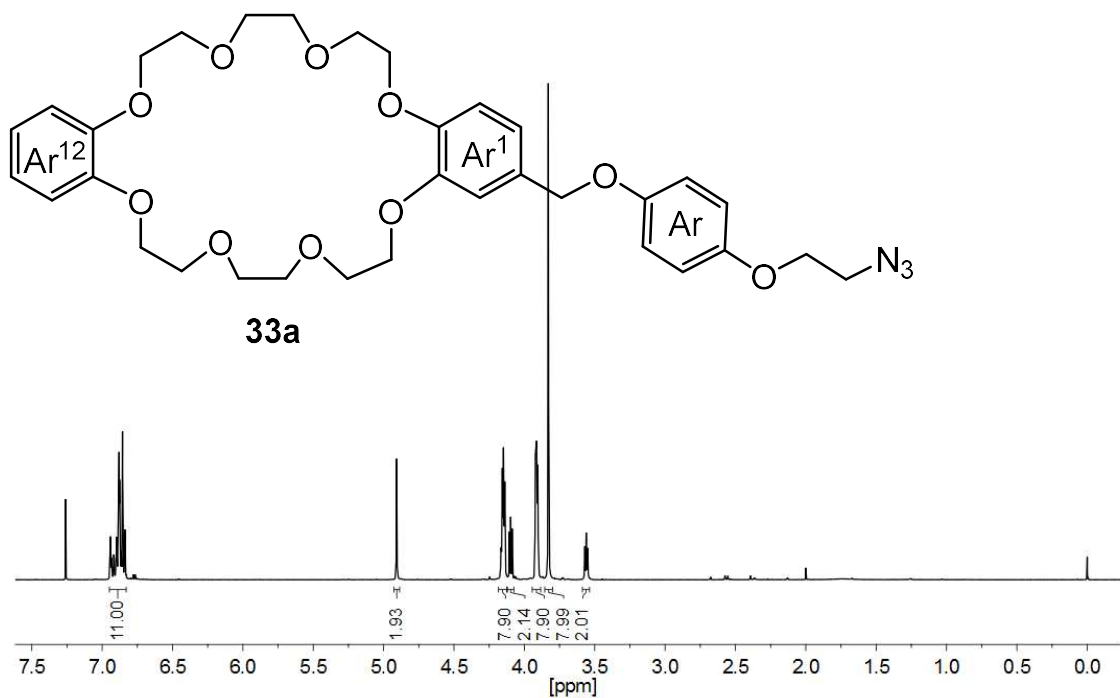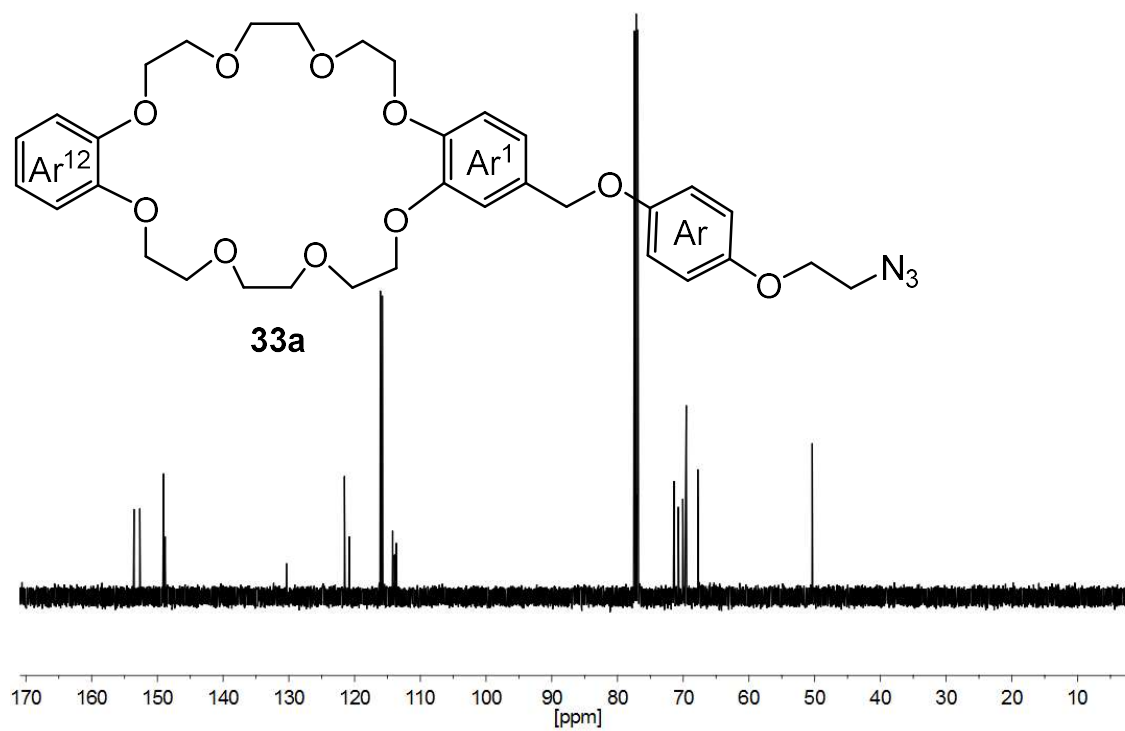

**1<sup>4</sup>-[4-(4-Azidobutyloxy)phenoxy]methyl]-1,12-[1,2]dibenzena-2,5,8,11,13,16,19,22-octaoxadocosaphan (33b)**

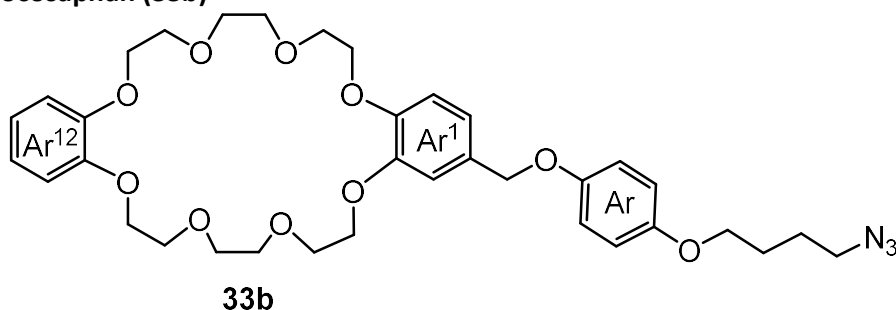

Under nitrogen atmosphere, phenol **28b** (842 mg, 4.07 mmol) and cesium carbonate (3.97 g, 12.2 mmol) were suspended in dry acetone (100 mL) and stirred under reflux for 2 h. A catalytic amount of potassium iodide and DB24C8-CH<sub>2</sub>Br (**24**, 2.00 g, 3.70 mmol) were then added and stirred for 16 h under reflux. After cooling, water (50 mL) was added and the aqueous phase extracted with dichloromethane (3 x 50 mL). The organic phase was dried over magnesium sulphate, filtered and the solvent removed in a vacuum. The raw product was cleaned on silica gel [dichloromethane : acetonitrile (1 : 0) → (3 : 1)]. The colorless solid was recrystallized from *n*-hexane/chloroform.

**Ausbeute:** 832 mg (1.25 mmol, 34 %).

**Schmelzpunkt:** 86 °C.

**<sup>1</sup>H-NMR** (500 MHz, CDCl<sub>3</sub>): δ = 6.96-6.76 (m, 11 H, Ar<sup>1</sup>-H-3,5,6, Ar<sup>12</sup>-H-3,4,5,6, Ar-H-2,3,5,6), 4.90 (s, 2 H, Ar<sup>1</sup>-CH<sub>2</sub>), 4.18-4.12 (m, 8 H, Ar<sup>1</sup>-OCH<sub>2</sub>, Ar<sup>12</sup>-OCH<sub>2</sub>), 3.96-3.89 (m, 10 H, Ar-OCH<sub>2</sub>CH<sub>2</sub>, Ar<sup>1</sup>-OCH<sub>2</sub>CH<sub>2</sub>, Ar<sup>12</sup>-OCH<sub>2</sub>CH<sub>2</sub>), 3.83 (s, 8 H, Ar<sup>1</sup>-OCH<sub>2</sub>CH<sub>2</sub>OCH<sub>2</sub>, Ar<sup>12</sup>-OCH<sub>2</sub>CH<sub>2</sub>OCH<sub>2</sub>), 3.35 (t, <sup>3</sup>J = 6.6 Hz, 2 H, CH<sub>2</sub>N<sub>3</sub>), 1.88-1.74 (m, 4 H, CH<sub>2</sub>CH<sub>2</sub>CH<sub>2</sub>N<sub>3</sub>) ppm.

**<sup>13</sup>C-NMR** (125 MHz, CDCl<sub>3</sub>): δ = 153.3 (s, Ar-C-1), 153.1 (s, Ar-C-4), 149.2 (s, Ar<sup>1</sup>-C-2), 149.1 (s, Ar<sup>12</sup>-C-1,2), 148.8 (s, Ar<sup>1</sup>-C-1), 130.5 (s, Ar<sup>1</sup>-C-4), 121.6 (d, Ar<sup>12</sup>-C-4,5), 120.8 (d, Ar<sup>1</sup>-C-5), 116.1 (d, Ar-C-2,6), 115.5 (s, Ar-C-3,5), 114.25 (d, Ar<sup>12</sup>-C-3,6), 114.0 (d, Ar<sup>1</sup>-C-6), 113.7 (d, Ar<sup>1</sup>-C-3), 71.41 (t, CH<sub>2</sub>), 71.39 (t, CH<sub>2</sub>), 70.8 (t, Ar<sup>1</sup>-CH<sub>2</sub>), 70.1 (t, CH<sub>2</sub>), 70.01 (t, CH<sub>2</sub>), 70.00 (t, CH<sub>2</sub>), 69.7 (t, CH<sub>2</sub>), 69.6 (t, CH<sub>2</sub>), 69.5 (t, CH<sub>2</sub>), 67.9 (t, Ar-OCH<sub>2</sub>CH<sub>2</sub>), 51.4 (t, CH<sub>2</sub>N<sub>3</sub>), 26.7 (t, CH<sub>2</sub>CH<sub>2</sub>CH<sub>2</sub>N<sub>3</sub>), 25.9 (t, CH<sub>2</sub>CH<sub>2</sub>N<sub>3</sub>) ppm.

**IR** (ATR):  $\tilde{\nu}$  = 2928 (w, aliph. CH.), 2102 (s, azide), 1507, 1452 (s, arom.), 1219, 1123, 1101, 1052 (s, CO), 823 (s, 1,4-disubst.), 739 (s, 1,2-disubst.) cm<sup>-1</sup>.

**MS** (HR-ESI): C<sub>35</sub>H<sub>45</sub>N<sub>3</sub>NaO<sub>10</sub> calcd. *m/z* = 690.2997, found *m/z* = 690.2988 (Δ = -1.30 ppm).

**Elemental analysis:** C<sub>35</sub>H<sub>45</sub>N<sub>3</sub>O<sub>10</sub>: calcd. C 62.95, H 6.79, N 6.29, found C 62.84, H 6.96, N 6.36.

20180815-27-L508Duden\_8464  
 Position 27, Mitarbeiter Duden, Sample TD - P -262 F 2 umkr, Menge 15.0 mg/CDCl<sub>3</sub>, Re kein

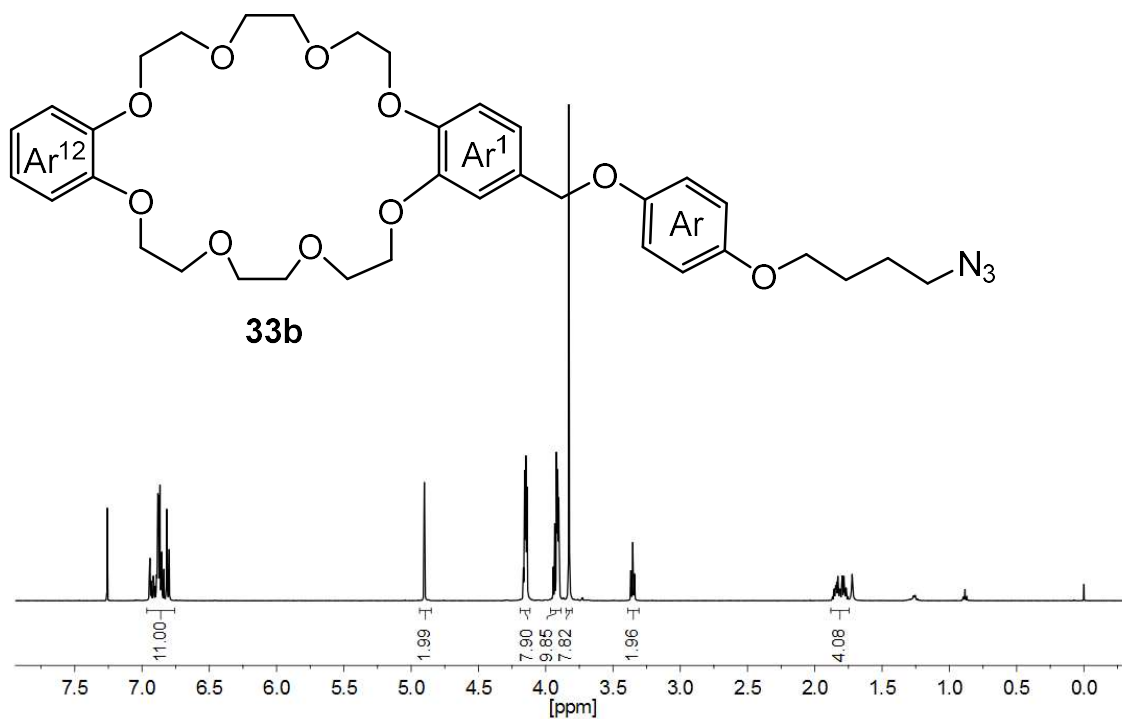

20180815-27-L508Duden\_8464  
 Position 27, Mitarbeiter Duden, Sample TD - P -262 F 2 umkr, Menge 15.0 mg/CDCl<sub>3</sub>, Re kein

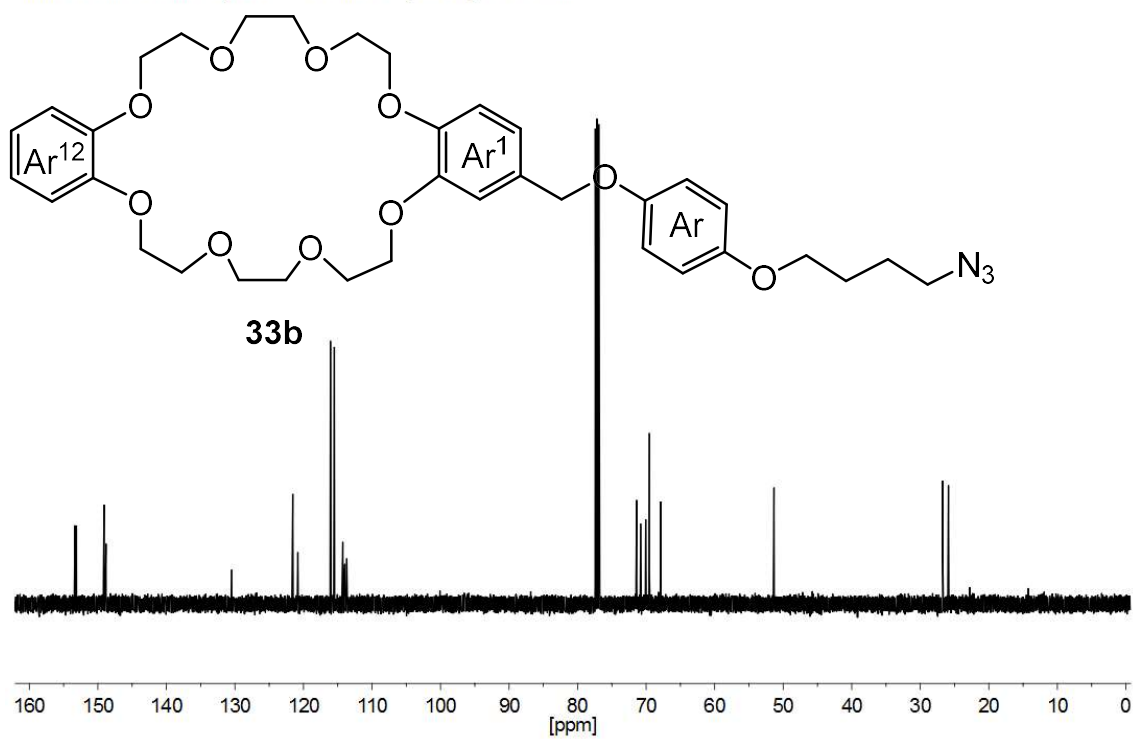

**1<sup>4</sup>-[4-(6-Azidohexyloxy)phenoxyethyl]-1,12-[1,2]dibenzena-2,5,8,11,13,16,19,22-octaoxadocosaphan (33c)**

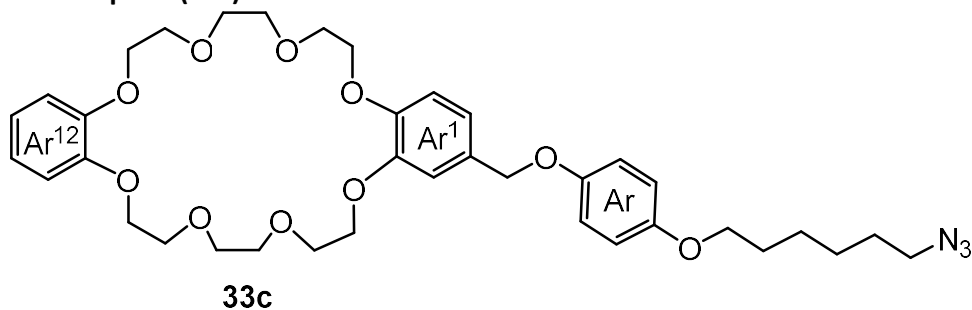

Under nitrogen atmosphere, phenol **28c** (477 mg, 2.03 mmol) and cesium carbonate (2.00 g, 6.06 mmol) were suspended in dry acetone (100 mL) and stirred under reflux for 2 h. A catalytic amount of potassium iodide and DB24C8-CH<sub>2</sub>Br (**24**, 1.00 g, 1.85 mmol) were then added and stirred for 16 h under reflux. After cooling, water (50 mL) was added and the aqueous phase extracted with dichloromethane (3 x 50 mL). The organic phase was dried over magnesium sulphate, filtered and the solvent removed in a vacuum. The raw product was cleaned on silica gel [dichloromethane : acetonitrile (1 : 0) → (3 : 1)]. The colorless solid was recrystallized from *n*-hexane/chloroform.

**Yield:** 968 mg (1.39 mmol, 75 %).

**Meltingpoint:** 66 °C.

**<sup>1</sup>H-NMR** (500 MHz, CDCl<sub>3</sub>): δ = 6.96-6.79 (m, 11 H, Ar<sup>1</sup>-H-3,5,6, Ar<sup>12</sup>-H-3,4,5,6, Ar-H-2,3,5,6), 4.90 (s, 2 H, Ar<sup>1</sup>-CH<sub>2</sub>), 4.18-4.12 (m, 8 H, Ar<sup>1</sup>-OCH<sub>2</sub>, Ar<sup>12</sup>-OCH<sub>2</sub>), 3.94-3.88 (m, 10 H, Ar-OCH<sub>2</sub>CH<sub>2</sub>, Ar<sup>1</sup>-OCH<sub>2</sub>CH<sub>2</sub>, Ar<sup>12</sup>-OCH<sub>2</sub>CH<sub>2</sub>), 3.83 (s, 8 H, Ar<sup>1</sup>-OCH<sub>2</sub>CH<sub>2</sub>OCH<sub>2</sub>, Ar<sup>12</sup>-OCH<sub>2</sub>CH<sub>2</sub>OCH<sub>2</sub>), 3.28 (t, <sup>3</sup>J = 6.9 Hz, 2 H, CH<sub>2</sub>N<sub>3</sub>), 1.81-1.73 (m, 2 H, Ar-OCH<sub>2</sub>CH<sub>2</sub>), 1.66-1.60 (m, 2 H, CH<sub>2</sub>CH<sub>2</sub>N<sub>3</sub>), 1.54-1.40 (m, 4 H, Ar-OCH<sub>2</sub>CH<sub>2</sub>CH<sub>2</sub>, CH<sub>2</sub>CH<sub>2</sub>CH<sub>2</sub>N<sub>3</sub>) ppm.

**<sup>13</sup>C-NMR** (125 MHz, CDCl<sub>3</sub>): δ = 153.5 (s, Ar-C-1), 153.0 (s, Ar-C-4), 149.14 (s, Ar<sup>1</sup>-C-2), 149.08 (s, Ar<sup>12</sup>-C-1,2), 148.8 (s, Ar<sup>1</sup>-C-1), 130.3 (s, Ar<sup>1</sup>-C-4), 121.6 (d, Ar<sup>12</sup>-C-4,5), 120.8 (d, Ar<sup>1</sup>-C-5), 116.0 (d, Ar-C-2,6), 115.5 (s, Ar-C-3,5), 114.2 (d, Ar<sup>12</sup>-C-3,6), 113.9 (d, Ar<sup>1</sup>-C-6), 113.7 (d, Ar<sup>1</sup>-C-3), 71.4 (t, CH<sub>2</sub>), 70.8 (t, Ar<sup>1</sup>-CH<sub>2</sub>), 70.1 (t, CH<sub>2</sub>), 70.0 (t, CH<sub>2</sub>), 69.7 (t, CH<sub>2</sub>), 69.6 (t, CH<sub>2</sub>), 69.5 (t, CH<sub>2</sub>), 68.4 (t, Ar-OCH<sub>2</sub>CH<sub>2</sub>), 51.5 (t, CH<sub>2</sub>N<sub>3</sub>), 29.4 (t, Ar-OCH<sub>2</sub>CH<sub>2</sub>), 28.9 (t, CH<sub>2</sub>CH<sub>2</sub>N<sub>3</sub>), 26.6 (t, CH<sub>2</sub>CH<sub>2</sub>CH<sub>2</sub>N<sub>3</sub>), 25.8 (Ar-OCH<sub>2</sub>CH<sub>2</sub>CH<sub>2</sub>) ppm.

**IR** (ATR):  $\tilde{\nu}$  = 2900, 2864 (s, aliph. CH), 2097 (s, azide), 1506, 1451 (s, arom.), 1258, 1221, 1123, 1105, 1055 (s, CO), 820 (m, 1,4-disubst.), 739 (m, 1,2-disubst.) cm<sup>-1</sup>.

**MS** (HR-ESI): C<sub>37</sub>H<sub>49</sub>N<sub>3</sub>NaO<sub>10</sub> calcd. *m/z* = 718.3310, found *m/z* = 718.3299 (Δ = -1.57 ppm).

**Elemental analysis:** C<sub>37</sub>H<sub>49</sub>N<sub>3</sub>O<sub>10</sub>: calcd. C 63.87, H 7.10, N 6.04, found C 63.68, H 7.13, N 6.04.

20180208-36-L502Duden\_6204  
 Position 36, Mitarbeiter Duden, Sample TD - P -205\_F 3, Menge 12.0 mg/CDCl3, Re kein

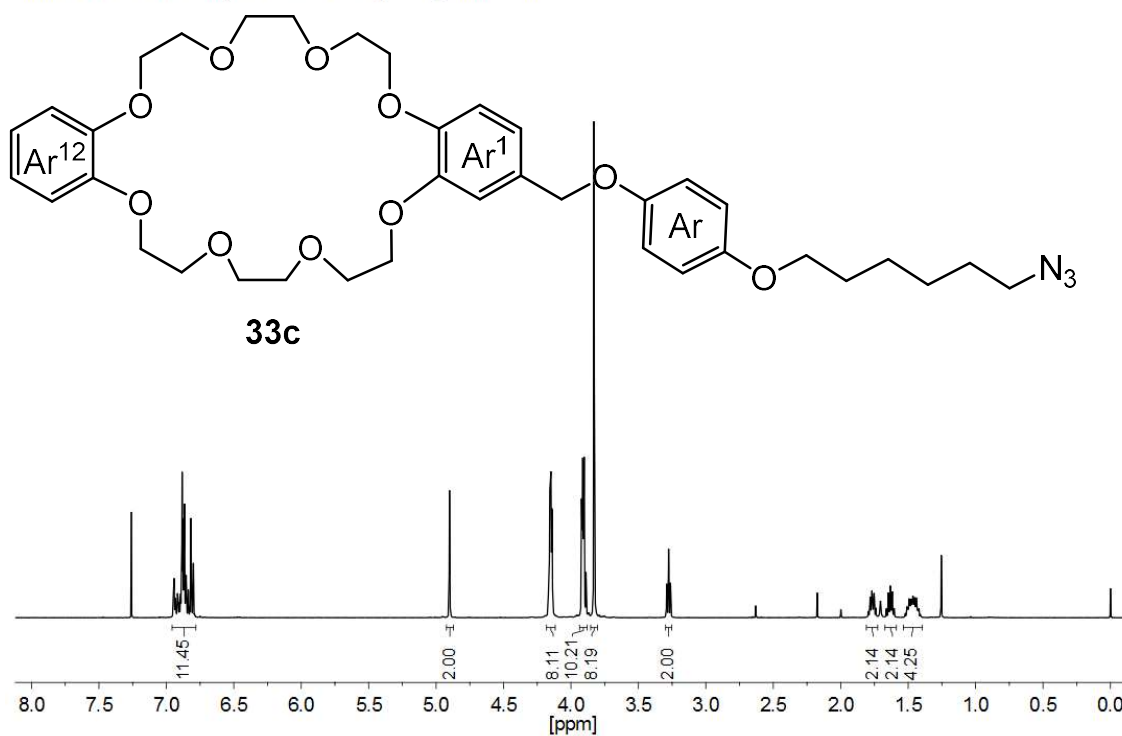

20180208-36-L502Duden\_6204  
 Position 36, Mitarbeiter Duden, Sample TD - P -205\_F 3, Menge 12.0 mg/CDCl3, Re kein

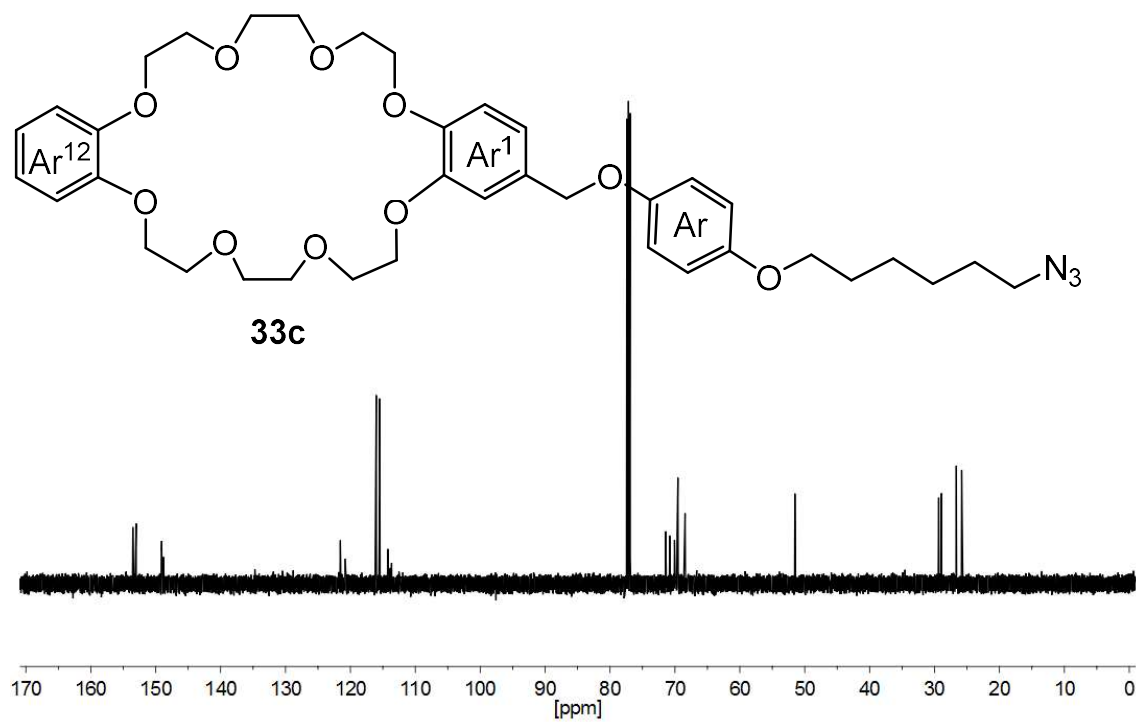

**1<sup>4</sup>-[4-(8-Azidooctyloxy)phenoxyethyl]-1,12-[1,2]dibenzena-2,5,8,11,13,16,19,22-octaoxadocosaphane (33d)**

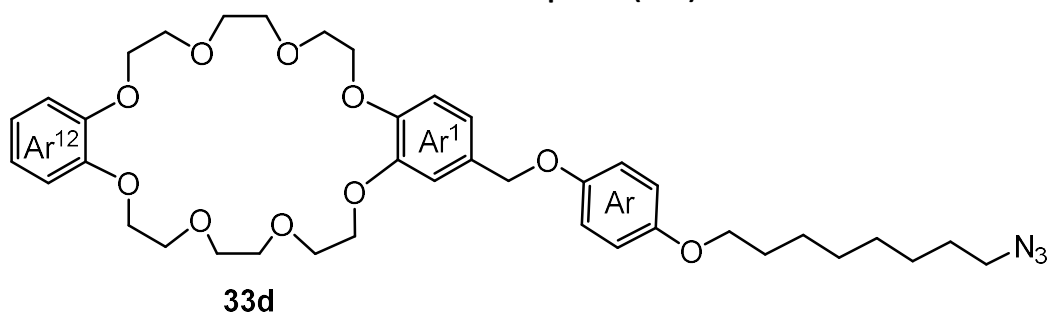

Under nitrogen atmosphere, the phenol **28d** (1.07 g, 4.06 mmol) and cesium carbonate (4.00 g, 12.2 mmol) were suspended in dry acetone (100 mL) and stirred under reflux for 2 h. A catalytic amount of potassium iodide and DB24C8-CH<sub>2</sub>Br (**24**, 2.00 g, 3.69 mmol) were then added and stirred for 16 h under reflux. After cooling, water (50 mL) was added and the aqueous phase extracted with dichloromethane (3 x 50 mL). The organic phase was dried over magnesium sulphate, filtered and the solvent removed in a vacuum. The raw product was cleaned on silica gel [dichloromethane : acetonitrile (1 : 0) → (3 : 1)]. The colorless solid was recrystallized from *n*-hexane/chloroform.

**Ausbeute:** 684 mg (946 μmol, 26 %).

**Meltingpoint:** 65 °C.

**<sup>1</sup>H-NMR** (500 MHz, CDCl<sub>3</sub>): δ = 6.96-6.79 (m, 11 H, Ar<sup>1</sup>-H-3,5,6, Ar<sup>12</sup>-H-3,4,5,6, Ar-H-2,3,5,6), 4.90 (s, 2 H, Ar<sup>1</sup>-CH<sub>2</sub>), 4.18-4.11 (m, 8 H, Ar<sup>1</sup>-OCH<sub>2</sub>, Ar<sup>12</sup>-OCH<sub>2</sub>), 3.94-3.87 (m, 10 H, Ar-OCH<sub>2</sub>CH<sub>2</sub>, Ar<sup>1</sup>-OCH<sub>2</sub>CH<sub>2</sub>, Ar<sup>12</sup>-OCH<sub>2</sub>CH<sub>2</sub>), 3.83 (s, 8 H, Ar<sup>1</sup>-OCH<sub>2</sub>CH<sub>2</sub>OCH<sub>2</sub>, Ar<sup>12</sup>-OCH<sub>2</sub>CH<sub>2</sub>OCH<sub>2</sub>), 3.26 (t, <sup>3</sup>J = 7.0 Hz, 2 H, CH<sub>2</sub>N<sub>3</sub>), 1.79-1.71 (m, 2 H, Ar-OCH<sub>2</sub>CH<sub>2</sub>), 1.64-1.56 (m, 2 H, CH<sub>2</sub>CH<sub>2</sub>N<sub>3</sub>), 1.49-1.41 (m, 2 H, Ar-OCH<sub>2</sub>CH<sub>2</sub>CH<sub>2</sub>), 1.41-1.31 (m, 6 H, CH<sub>2</sub>CH<sub>2</sub>CH<sub>2</sub>CH<sub>2</sub>CH<sub>2</sub>N<sub>3</sub>) ppm.

**<sup>13</sup>C-NMR** (125 MHz, CDCl<sub>3</sub>): δ = 153.6 (s, Ar-C-1), 153.0 (s, Ar-C-4), 149.11 (s, Ar<sup>1</sup>-C-2), 149.06 (s, Ar<sup>12</sup>-C-1,2), 148.8 (s, Ar<sup>1</sup>-C-1), 130.5 (s, Ar<sup>1</sup>-C-4), 121.6 (d, Ar<sup>12</sup>-C-4,5), 120.8 (d, Ar<sup>1</sup>-C-5), 116.0 (d, Ar-C-2,6), 115.5 (s, Ar-C-3,5), 114.2 (d, Ar<sup>12</sup>-C-3,6), 113.9 (d, Ar<sup>1</sup>-C-6), 113.7 (d, Ar<sup>1</sup>-C-3), 71.4 (t, CH<sub>2</sub>), 70.8 (t, Ar<sup>1</sup>-CH<sub>2</sub>), 70.04 (t, CH<sub>2</sub>), 69.98 (t, CH<sub>2</sub>), 69.6 (t, CH<sub>2</sub>), 69.54 (t, CH<sub>2</sub>), 69.51 (t, CH<sub>2</sub>), 68.6 (t, Ar-OCH<sub>2</sub>CH<sub>2</sub>), 51.6 (t, CH<sub>2</sub>N<sub>3</sub>), 29.5 (t, Ar-OCH<sub>2</sub>CH<sub>2</sub>), 29.4 (t, Ar-OCH<sub>2</sub>CH<sub>2</sub>CH<sub>2</sub>CH<sub>2</sub>), 29.2 (CH<sub>2</sub>CH<sub>2</sub>CH<sub>2</sub>CH<sub>2</sub>N<sub>3</sub>), 28.9 (t, CH<sub>2</sub>CH<sub>2</sub>N<sub>3</sub>), 26.8 (t, CH<sub>2</sub>CH<sub>2</sub>CH<sub>2</sub>N<sub>3</sub>), 26.1 (t, Ar-OCH<sub>2</sub>CH<sub>2</sub>CH<sub>2</sub>) ppm.

**IR** (ATR):  $\tilde{\nu}$  = 2926, 2853 (m, aliph. CH), 2094 (s, azide), 1507, 1451 (s, arom.), 1258, 1217, 1137, 1126, 1055 (s, CO), 821 (s, 1,4-disubst.), 739 (s, 1,2-disubst.) cm<sup>-1</sup>.

**MS** (HR-ESI): C<sub>39</sub>H<sub>53</sub>N<sub>3</sub>NaO<sub>10</sub> calcd. *m/z* = 746.3623, found *m/z* = 746.3623 (Δ = -0.05 ppm).

**Elemental analysis:** C<sub>39</sub>H<sub>53</sub>N<sub>3</sub>O<sub>10</sub>: calcd. C 64.71, H 7.38, N 5.81, found C 64.76, H 7.20, N 5.95.

20180822-18-L508Duden\_8617  
 Position 18, Mitarbeiter Duden, Sample TD - P -274 F 3, Menge 15.0 mg/CDCl<sub>3</sub>, Re kein

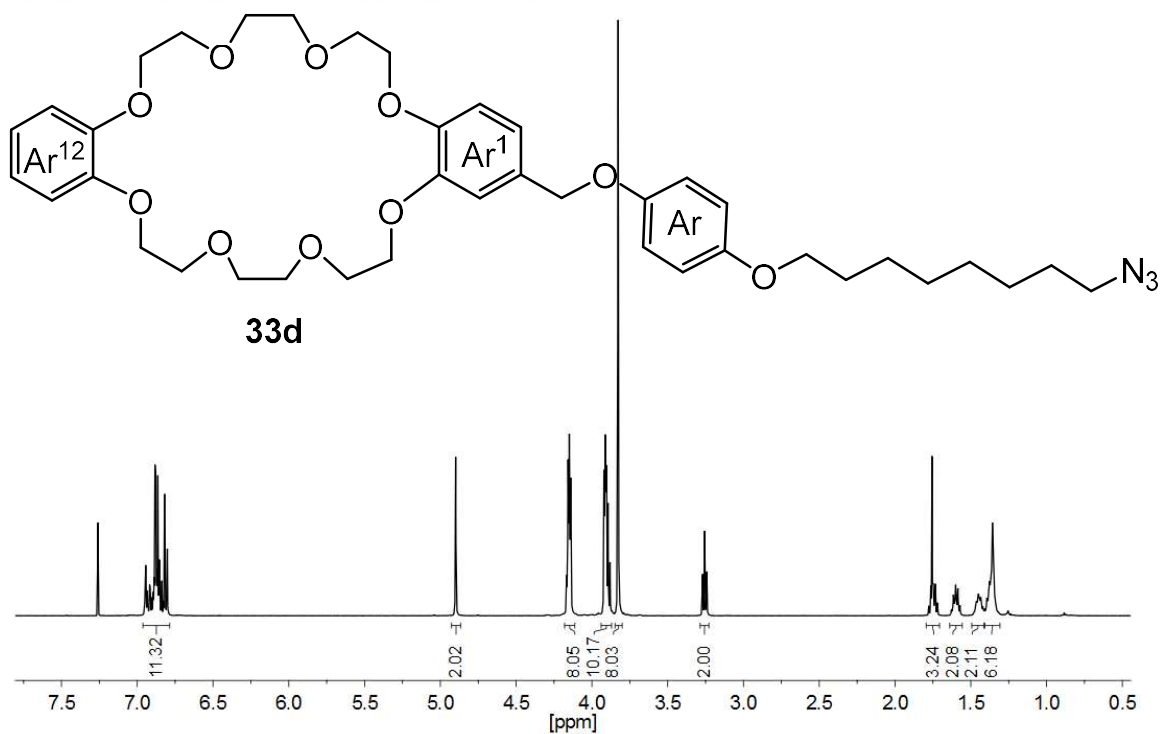

20180822-18-L508Duden\_8617  
 Position 18, Mitarbeiter Duden, Sample TD - P -274 F 3, Menge 15.0 mg/CDCl<sub>3</sub>, Re kein

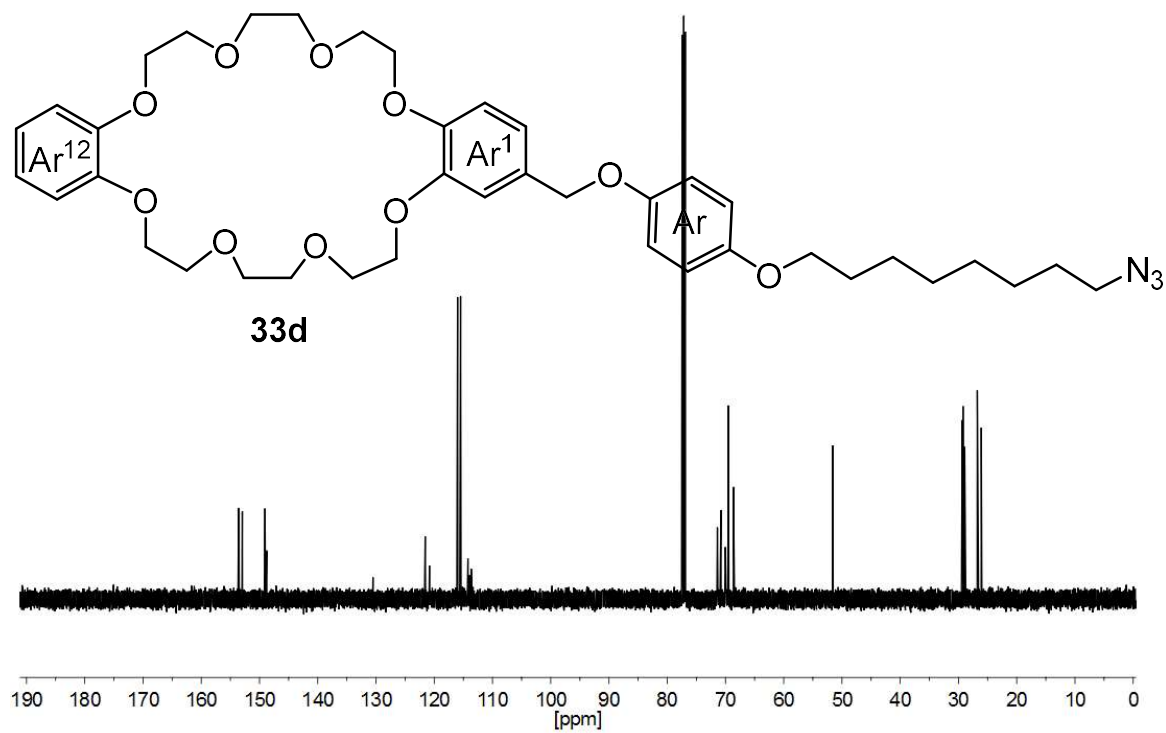



**1<sup>4</sup>-(4-{2-[2-(2-Azidoethoxy)ethoxy]ethoxy}phenoxy)methyl)-1,12-[1,2]dibenzena-2,5,8,11,13,16,19,22-octaoxadocosaphane (34)**

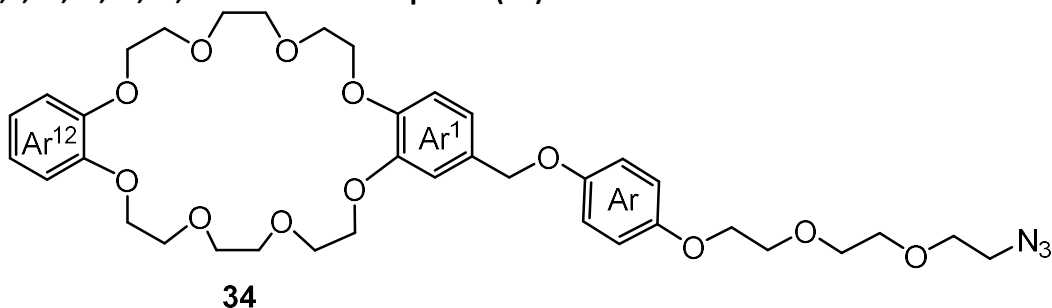

Under nitrogen atmosphere, phenol **32** (1.26 g, 4.72 mmol) and cesium carbonate (4.60 g, 14.0 mmol) were suspended in dry acetone (100 mL) and stirred under reflux for 2 h. A catalytic amount of potassium iodide and DB24C8-CH<sub>2</sub>Br (**24**, 2.43 g, 4.48 mmol) were then added and stirred for 16 h under reflux. After cooling, water (50 mL) was added and the aqueous phase extracted with dichloromethane (3 x 50 mL). The organic phase was dried over magnesium sulphate, filtered and the solvent removed in a vacuum. The raw product was cleaned on silica gel [dichloromethane : acetonitrile (1 : 0) → (3 : 1)]. The colorless solid was recrystallized from *n*-hexane/chloroform.

**Yield:** 1.22 g (1.77 mmol, 37 %).

**Meltingpoint:** 62 °C.

**<sup>1</sup>H-NMR** (500 MHz, CDCl<sub>3</sub>): δ = 6.96-6.81 (m, 11 H, Ar<sup>1</sup>-H-3,5,6, Ar<sup>12</sup>-H-3,4,5,6, Ar-H-2,3,5,6), 4.90 (s, 2 H, Ar<sup>1</sup>-CH<sub>2</sub>), 4.17-4.13 (m, 8 H, Ar<sup>1</sup>-OCH<sub>2</sub>, Ar<sup>12</sup>-OCH<sub>2</sub>), 4.08 (t, <sup>3</sup>J = 5.2 Hz, 2 H, Ar-OCH<sub>2</sub>CH<sub>2</sub>), 3.93-3.89 (m, 8 H, Ar<sup>1</sup>-OCH<sub>2</sub>CH<sub>2</sub>, Ar<sup>12</sup>-OCH<sub>2</sub>CH<sub>2</sub>), 3.86-3.81 (m, 10 H, Ar<sup>1</sup>-OCH<sub>2</sub>CH<sub>2</sub>OCH<sub>2</sub>, Ar<sup>12</sup>-OCH<sub>2</sub>CH<sub>2</sub>OCH<sub>2</sub>, Ar-OCH<sub>2</sub>CH<sub>2</sub>), 3.75-3.71 (m, 2 H, Ar-OCH<sub>2</sub>CH<sub>2</sub>OCH<sub>2</sub>), 3.70-3.66 (m, 4 H, CH<sub>2</sub>OCH<sub>2</sub>CH<sub>2</sub>N<sub>3</sub>), 3.38 (t, <sup>3</sup>J = 5.1 Hz, 2 H, CH<sub>2</sub>N<sub>3</sub>) ppm.

**<sup>13</sup>C-NMR** (125 MHz, CDCl<sub>3</sub>): δ = 153.24 (s, Ar-C-1), 153.21 (s, Ar-C-4), 149.12 (s, Ar<sup>1</sup>-C-2), 149.07 (s, Ar<sup>12</sup>-C-1,2), 148.8 (s, Ar<sup>1</sup>-C-1), 130.4 (s, Ar<sup>1</sup>-C-4), 121.5 (d, Ar<sup>12</sup>-C-4,5), 120.8 (d, Ar<sup>1</sup>-C-5), 116.0 (d, Ar-C-2,6), 115.7 (s, Ar-C-3,5), 114.2 (d, Ar<sup>12</sup>-C-3,6), 113.9 (d, Ar<sup>1</sup>-C-6), 113.6 (d, Ar<sup>1</sup>-C-3), 71.4 (t, CH<sub>2</sub>), 71.0 (t, CH<sub>2</sub>), 70.9 (t, CH<sub>2</sub>), 70.7 (t, Ar<sup>1</sup>-CH<sub>2</sub>), 70.2 (t, CH<sub>2</sub>), 70.08 (t, CH<sub>2</sub>), 70.05 (t, CH<sub>2</sub>), 70.00 (t, CH<sub>2</sub>), 69.98 (t, CH<sub>2</sub>), 69.7 (t, CH<sub>2</sub>), 69.6 (t, CH<sub>2</sub>), 69.5 (t, CH<sub>2</sub>), 68.2 (t, Ar-OCH<sub>2</sub>CH<sub>2</sub>), 50.8 (t, CH<sub>2</sub>N<sub>3</sub>) ppm.

**IR** (ATR):  $\tilde{\nu}$  = 2875 (m, aliph. CH), 2101 (s, azide), 1508, 1447 (s, arom.), 1229, 1104, 1062 (s, CO), 834 (s, 1,4-disubst.), 750 (s, 1,2-disubst.) cm<sup>-1</sup>.

**MS** (HR-ESI): C<sub>37</sub>H<sub>49</sub>N<sub>3</sub>NaO<sub>12</sub> calcd. *m/z* = 750.3208, found *m/z* = 750.3204 (Δ = -0.62 ppm).

**Elemental analysis:** C<sub>37</sub>H<sub>49</sub>N<sub>3</sub>O<sub>12</sub>: calcd. C 61.06, H 6.79, N 5.77, found C 60.70, H 6.76, N 5.73.

20181108-37-LS11Duden\_9620  
Position 37, Mitarbeiter Duden, Sample TD - P - 308 cm, Menge 20.0 mg/CDCl<sub>3</sub>, Re kein

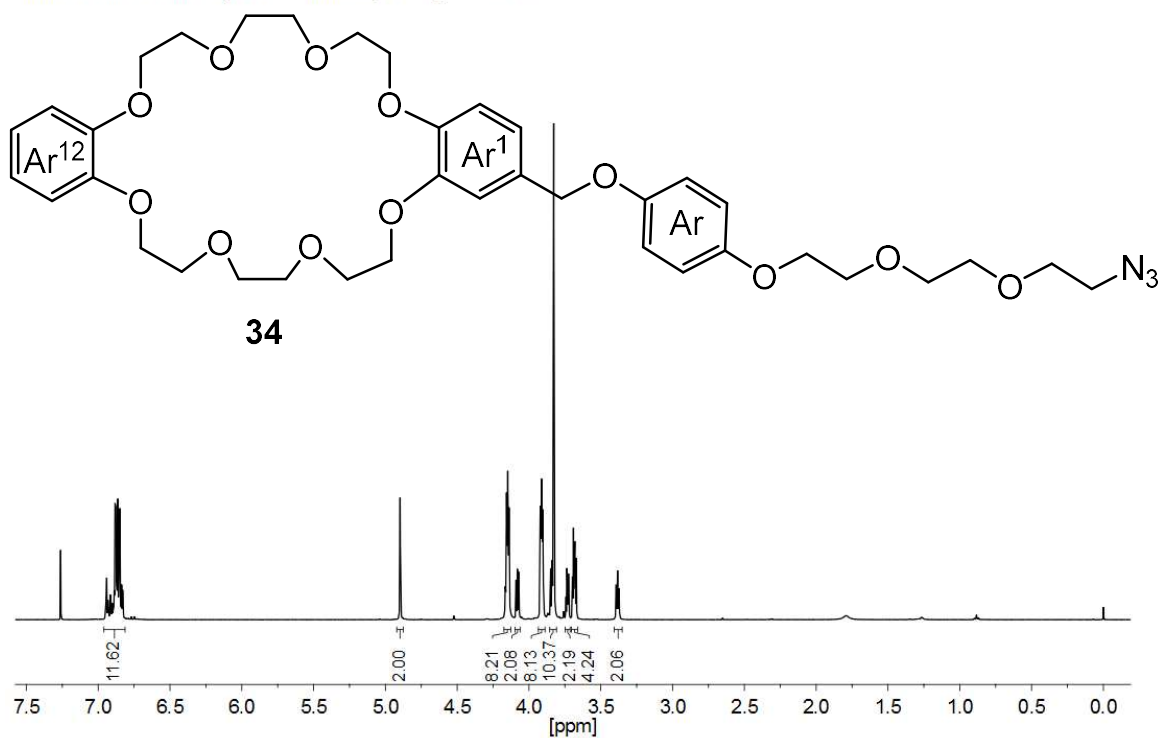

20181102-26-LS11Duden\_9534  
Position 26, Mitarbeiter Duden, Sample TD - P - 302, Menge 11.0 mg/CDCl<sub>3</sub>, Re kein

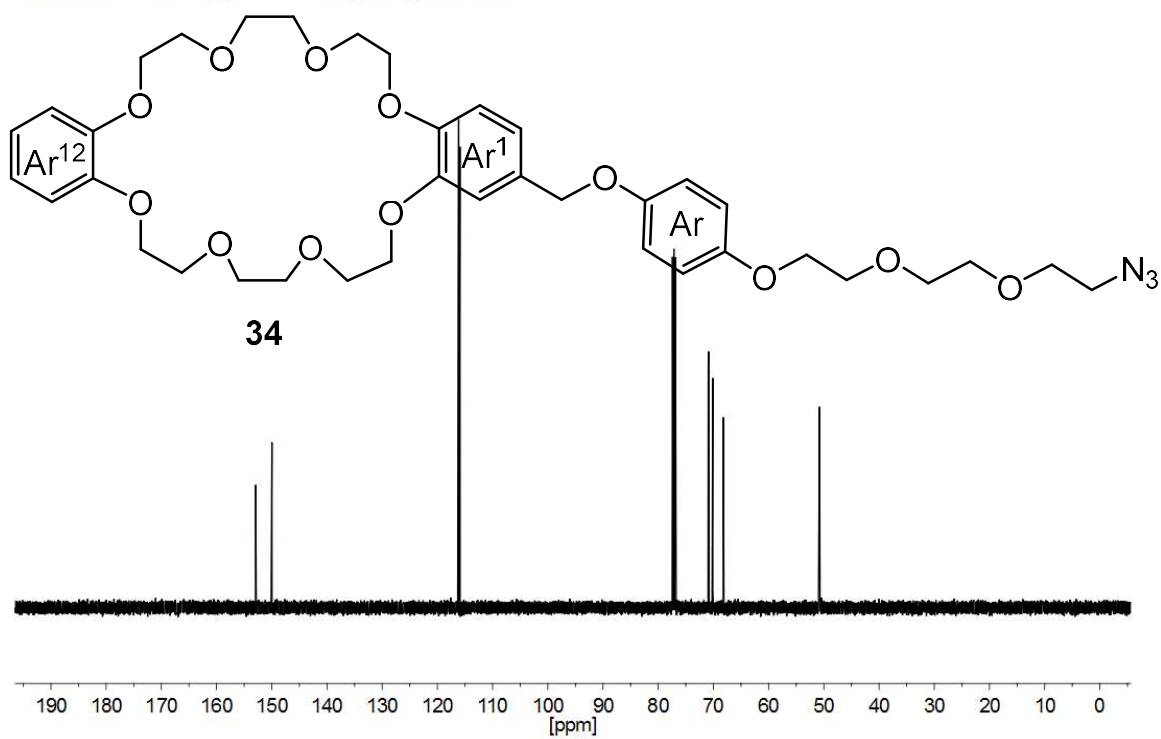

## References

1. Chavez-Acevedo, L.; Miranda, L. D. Synthesis of novel tryptamine-based macrocycles using an Ugi 4-CR/microwave assisted click-cycloaddition reaction protocol, *Org. Biomol. Chem.* **2015**, *13*, 4408-4412.
2. Talotta, C.; Gaeta, C.; Pierro, T.; Neri, P., Sequence stereoisomerism in calixarene-based pseudo[3]rotaxanes, *Org. Lett.* **2011**, *13*, 2098-2101.
3. Zhang, Y., Lai, L.; Cai, P.; Cheng, G.-Z.; Xuc, X.-M.; Liua, Y. Synthesis, characterization and anticancer activity of dinuclear ruthenium(ii) complexes linked by an alkyl chain, *New J. Chem.* **2015**, *39*, 5805-5812.
4. Aucagne, V.; Hänni, K.D.; Leigh, D.A.; Lusby, P.J.; Walke, D.B. Catalytic click rotaxanes: a substoichiometric metal-template pathway to mechanically interlocked architectures, *J. Am. Chem. Soc.* **2006**, *128*, 2186-2187.
5. Yamaguchi, N.; Gibson, H.W. Formation of supramolecular polymers from homoditopic molecules containing secondary ammonium ions and crown ether moieties, *Angew. Chem.* **1999**, *111*, 195-199; *Angew. Chem. Int. Ed.* **1999**, *38*, 143-147.
6. Yang, Y.; Fu, H.; Cui, M.; Peng, C.; Liang, Z.; Dai, J.; Zhang, Z.; Lin, C.; Liu, B. Preliminary evaluation of fluoro-pegylated benzyloxybenzenes for quantification of  $\beta$ -amyloid plaques by positron emission tomography, *Eur. J. Med. Chem.* **2015**, *104*, 86-96.
7. Lim, J.Y.C.; Marques, I.; Thompson, A.L.; Christensen, K.E.; Félix, V.; Beer, P.D. Chalcogen bonding macrocycles and [2]rotaxanes for anion recognition, *J. Am. Chem. Soc.* **2017**, *139*, 3122-3133.
